# Supplementary material for: Whole Genome Sequence of Biosurfactant Producing Bacillus Tequilensis
Source: Research Square preprint supplement (doi:10.21203/rs.3.rs-115961/v2), 2021-04-30
Supplement: Supplementary file 1 [file 5fc796d5b589677f58178bc9.xlsx]

## Sheet: RMVO01_proteins
gb_accession	protein_len	product_name	title	gi	accession
MUF99442.1	251	collagen-like protein	collagen-like protein, partial [Bacillus tequilensis]	0	RMVO01P000001
MUF99443.1	223	glycosyltransferase	glycosyltransferase [Bacillus tequilensis]	0	RMVO01P000002
MUF99444.1	235	class I SAM-dependent methyltransferase	class I SAM-dependent methyltransferase [Bacillus tequilensis]	0	RMVO01P000003
MUF99446.1	458	glycosyltransferase	glycosyltransferase [Bacillus tequilensis]	0	RMVO01P000004
MUF99447.1	64	hypothetical protein	hypothetical protein ECC01_00030 [Bacillus tequilensis]	0	RMVO01P000005
MUF99448.1	500	recombinase family protein	recombinase family protein [Bacillus tequilensis]	0	RMVO01P000006
MUF99450.1	136	sporulation-specific extracellular nuclease	sporulation-specific extracellular nuclease [Bacillus tequilensis]	0	RMVO01P000007
MUF99451.1	240	DUF308 domain-containing protein	DUF308 domain-containing protein [Bacillus tequilensis]	0	RMVO01P000008
MUF99452.1	297	decarboxylating 6-phosphogluconate dehydrogenase	decarboxylating 6-phosphogluconate dehydrogenase [Bacillus tequilensis]	0	RMVO01P000009
MUF99453.1	208	TVP38/TMEM64 family protein	TVP38/TMEM64 family protein [Bacillus tequilensis]	0	RMVO01P000010
MUF99454.1	250	N-acetylmuramoyl-L-alanine amidase	N-acetylmuramoyl-L-alanine amidase [Bacillus tequilensis]	0	RMVO01P000011
MUF99455.1	243	SGNH/GDSL hydrolase family protein	SGNH/GDSL hydrolase family protein [Bacillus tequilensis]	0	RMVO01P000012
MUF99456.1	46	sporulation histidine kinase inhibitor Sda	sporulation histidine kinase inhibitor Sda [Bacillus tequilensis]	0	RMVO01P000013
MUF99457.1	172	YqeG family HAD IIIA-type phosphatase	YqeG family HAD IIIA-type phosphatase [Bacillus tequilensis]	0	RMVO01P000014
MUF99458.1	366	ribosome biogenesis GTPase YqeH	ribosome biogenesis GTPase YqeH [Bacillus tequilensis]	0	RMVO01P000015
MUF99459.1	280	shikimate dehydrogenase	shikimate dehydrogenase [Bacillus tequilensis]	0	RMVO01P000016
MUF99460.1	96	ribosome assembly RNA-binding protein YhbY	ribosome assembly RNA-binding protein YhbY [Bacillus tequilensis]	0	RMVO01P000017
MUF99461.1	189	nicotinate-nucleotide adenylyltransferase	nicotinate-nucleotide adenylyltransferase [Bacillus tequilensis]	0	RMVO01P000018
MUF99462.1	186	HD domain-containing protein	HD domain-containing protein [Bacillus tequilensis]	0	RMVO01P000019
MUF99463.1	118	ribosome silencing factor	ribosome silencing factor [Bacillus tequilensis]	0	RMVO01P000020
MUF99464.1	247	class I SAM-dependent methyltransferase	class I SAM-dependent methyltransferase [Bacillus tequilensis]	0	RMVO01P000021
MUF99465.1	273	late competence protein ComER	late competence protein ComER [Bacillus tequilensis]	0	RMVO01P000022
MUF99466.1	205	ComEA family DNA-binding protein	ComEA family DNA-binding protein [Bacillus tequilensis]	0	RMVO01P000023
MUF99467.1	189	ComE operon protein 2	ComE operon protein 2 [Bacillus tequilensis]	0	RMVO01P000024
MUF99468.1	776	DNA internalization-related competence protein ComEC/Rec2	DNA internalization-related competence protein ComEC/Rec2 [Bacillus tequilensis]	0	RMVO01P000025
MUF99469.1	44	YqzM family protein	YqzM family protein [Bacillus tequilensis]	0	RMVO01P000026
MUF99471.1	347	DNA polymerase III subunit delta	DNA polymerase III subunit delta [Bacillus tequilensis]	0	RMVO01P000027
MUF99472.1	88	30S ribosomal protein S20	30S ribosomal protein S20 [Bacillus tequilensis]	0	RMVO01P000028
MUF99473.1	368	GPR endopeptidase	GPR endopeptidase [Bacillus tequilensis]	0	RMVO01P000029
MUF99474.1	401	stage II sporulation protein P	stage II sporulation protein P [Bacillus tequilensis]	0	RMVO01P000030
MUF99475.1	112	DUF3679 domain-containing protein	DUF3679 domain-containing protein [Bacillus tequilensis]	0	RMVO01P000031
MUF99476.1	612	elongation factor 4	elongation factor 4 [Bacillus tequilensis]	0	RMVO01P000032
MUF99477.1	379	radical SAM family heme chaperone HemW	radical SAM family heme chaperone HemW [Bacillus tequilensis]	0	RMVO01P000033
MUF99478.1	343	heat-inducible transcriptional repressor HrcA	heat-inducible transcriptional repressor HrcA [Bacillus tequilensis]	0	RMVO01P000034
MUF99479.1	187	nucleotide exchange factor GrpE	nucleotide exchange factor GrpE [Bacillus tequilensis]	0	RMVO01P000035
MUF99480.1	611	molecular chaperone DnaK	molecular chaperone DnaK [Bacillus tequilensis]	0	RMVO01P000036
MUF99481.1	375	molecular chaperone DnaJ	molecular chaperone DnaJ [Bacillus tequilensis]	0	RMVO01P000037
MUF99482.1	311	50S ribosomal protein L11 methyltransferase	50S ribosomal protein L11 methyltransferase [Bacillus tequilensis]	0	RMVO01P000038
MUF99483.1	256	16S rRNA (uracil(1498)-N(3))-methyltransferase	16S rRNA (uracil(1498)-N(3))-methyltransferase [Bacillus tequilensis]	0	RMVO01P000039
MUF99484.1	451	tRNA (N(6)-L-threonylcarbamoyladenosine(37)-C(2))-methylthiotransferase MtaB	tRNA (N(6)-L-threonylcarbamoyladenosine(37)-C(2))-methylthiotransferase MtaB [Bacillus tequilensis]	0	RMVO01P000040
MUF99485.1	307	Na/Pi cotransporter family protein	Na/Pi cotransporter family protein [Bacillus tequilensis]	0	RMVO01P000041
MUF99486.1	57	30S ribosomal protein S21	30S ribosomal protein S21 [Bacillus tequilensis]	0	RMVO01P000042
MUF99487.1	148	GatB/YqeY domain-containing protein	GatB/YqeY domain-containing protein [Bacillus tequilensis]	0	RMVO01P000043
MUF99488.1	437	nodulation protein NfeD	nodulation protein NfeD [Bacillus tequilensis]	0	RMVO01P000044
MUF99489.1	331	UPF0365 family protein	UPF0365 family protein [Bacillus tequilensis]	0	RMVO01P000045
MUF99490.1	139	hypothetical protein	hypothetical protein ECC01_00245 [Bacillus tequilensis]	0	RMVO01P000046
MUF99491.1	93	sporulation protein YqfC	sporulation protein YqfC [Bacillus tequilensis]	0	RMVO01P000047
MUF99492.1	398	sporulation protein YqfD	sporulation protein YqfD [Bacillus tequilensis]	0	RMVO01P000048
MUF99493.1	319	PhoH family protein	PhoH family protein [Bacillus tequilensis]	0	RMVO01P000049
MUF99494.1	711	HD family phosphohydrolase	HD family phosphohydrolase [Bacillus tequilensis]	0	RMVO01P000050
MUF99495.1	157	rRNA maturation RNase YbeY	rRNA maturation RNase YbeY [Bacillus tequilensis]	0	RMVO01P000051
MUF99496.1	123	diacylglycerol kinase family protein	diacylglycerol kinase family protein [Bacillus tequilensis]	0	RMVO01P000052
MUF99497.1	136	cytidine deaminase	cytidine deaminase [Bacillus tequilensis]	0	RMVO01P000053
MUF99498.1	301	GTPase Era	GTPase Era [Bacillus tequilensis]	0	RMVO01P000054
MUF99499.1	47	YqzL family protein	YqzL family protein [Bacillus tequilensis]	0	RMVO01P000055
MUF99500.1	255	DNA repair protein RecO	DNA repair protein RecO [Bacillus tequilensis]	0	RMVO01P000056
MUF99501.1	295	glycine--tRNA ligase subunit alpha	glycine--tRNA ligase subunit alpha [Bacillus tequilensis]	0	RMVO01P000057
MUF99502.1	679	glycine--tRNA ligase subunit beta	glycine--tRNA ligase subunit beta [Bacillus tequilensis]	0	RMVO01P000058
MUF99503.1	212	helix-turn-helix transcriptional regulator	helix-turn-helix transcriptional regulator [Bacillus tequilensis]	0	RMVO01P000059
MUF99504.1	270	kinase/pyrophosphorylase	kinase/pyrophosphorylase [Bacillus tequilensis]	0	RMVO01P000060
MUF99505.1	164	YaiI/YqxD family protein	YaiI/YqxD family protein [Bacillus tequilensis]	0	RMVO01P000061
MUF99506.1	603	DNA primase	DNA primase [Bacillus tequilensis]	0	RMVO01P000062
MUF99507.1	371	RNA polymerase sigma factor RpoD	RNA polymerase sigma factor RpoD [Bacillus tequilensis]	0	RMVO01P000063
MUF99508.1	59	hypothetical protein	hypothetical protein ECC01_00335 [Bacillus tequilensis]	0	RMVO01P000064
MUF99509.1	120	cytochrome c	cytochrome c [Bacillus tequilensis]	0	RMVO01P000065
MUF99511.1	373	Nif3-like dinuclear metal center hexameric protein	Nif3-like dinuclear metal center hexameric protein [Bacillus tequilensis]	0	RMVO01P000066
MUF99512.1	314	4-hydroxy-3-methylbut-2-enyl diphosphate reductase	4-hydroxy-3-methylbut-2-enyl diphosphate reductase [Bacillus tequilensis]	0	RMVO01P000067
MUF99513.1	246	hypothetical protein	hypothetical protein ECC01_00360 [Bacillus tequilensis]	0	RMVO01P000068
MUF99514.1	438	DEAD/DEAH box helicase	DEAD/DEAH box helicase [Bacillus tequilensis]	0	RMVO01P000069
MUF99515.1	297	deoxyribonuclease IV	deoxyribonuclease IV [Bacillus tequilensis]	0	RMVO01P000070
MUF99516.1	84	DUF2624 domain-containing protein	DUF2624 domain-containing protein [Bacillus tequilensis]	0	RMVO01P000071
MUF99517.1	293	YitT family protein	YitT family protein [Bacillus tequilensis]	0	RMVO01P000072
MUF99518.1	145	transcriptional repressor	transcriptional repressor [Bacillus tequilensis]	0	RMVO01P000073
MUF99519.1	193	hypothetical protein	hypothetical protein ECC01_00390 [Bacillus tequilensis]	0	RMVO01P000074
MUF99520.1	129	DUF308 domain-containing protein	DUF308 domain-containing protein [Bacillus tequilensis]	0	RMVO01P000075
MUF99521.1	377	flavodoxin-dependent (E)-4-hydroxy-3-methylbut-2-enyl-diphosphate synthase	flavodoxin-dependent (E)-4-hydroxy-3-methylbut-2-enyl-diphosphate synthase [Bacillus tequilensis]	0	RMVO01P000076
MUF99522.1	99	LysM peptidoglycan-binding domain-containing protein	LysM peptidoglycan-binding domain-containing protein [Bacillus tequilensis]	0	RMVO01P000077
MUF99523.1	253	DUF1189 domain-containing protein	DUF1189 domain-containing protein [Bacillus tequilensis]	0	RMVO01P000078
MUF99524.1	160	DUF456 domain-containing protein	DUF456 domain-containing protein [Bacillus tequilensis]	0	RMVO01P000079
MUF99525.1	202	superoxide dismutase [Mn]	superoxide dismutase [Mn] [Bacillus tequilensis]	0	RMVO01P000080
MUF99526.1	430	MFS transporter	MFS transporter [Bacillus tequilensis]	0	RMVO01P000081
MUF99527.1	716	penicillin-binding protein 2	penicillin-binding protein 2 [Bacillus tequilensis]	0	RMVO01P000082
MUF99528.1	300	phosphate ABC transporter substrate-binding protein	phosphate ABC transporter substrate-binding protein [Bacillus tequilensis]	0	RMVO01P000083
MUF99529.1	309	phosphate ABC transporter permease subunit PstC	phosphate ABC transporter permease subunit PstC [Bacillus tequilensis]	0	RMVO01P000084
MUF99530.1	294	phosphate ABC transporter permease PstA	phosphate ABC transporter permease PstA [Bacillus tequilensis]	0	RMVO01P000085
MUF99531.1	269	phosphate ABC transporter ATP-binding protein	phosphate ABC transporter ATP-binding protein [Bacillus tequilensis]	0	RMVO01P000086
MUF99532.1	260	phosphate ABC transporter ATP-binding protein	phosphate ABC transporter ATP-binding protein [Bacillus tequilensis]	0	RMVO01P000087
MUF99533.1	154	endolytic transglycosylase MltG	endolytic transglycosylase MltG [Bacillus tequilensis]	0	RMVO01P000088
MUF99534.1	117	hypothetical protein	hypothetical protein ECC01_00465 [Bacillus tequilensis]	0	RMVO01P000089
MUF99535.1	156	hypothetical protein	hypothetical protein ECC01_00470 [Bacillus tequilensis]	0	RMVO01P000090
MUF99536.1	359	glycosyltransferase family 4 protein	glycosyltransferase family 4 protein [Bacillus tequilensis]	0	RMVO01P000091
MUF99537.1	49	50S ribosomal protein L33	50S ribosomal protein L33 [Bacillus tequilensis]	0	RMVO01P000092
MUF99538.1	187	5-formyltetrahydrofolate cyclo-ligase	5-formyltetrahydrofolate cyclo-ligase [Bacillus tequilensis]	0	RMVO01P000093
MUF99539.1	57	hypothetical protein	hypothetical protein ECC01_00490 [Bacillus tequilensis]	0	RMVO01P000094
MUF99540.1	507	rhomboid family intramembrane serine protease	rhomboid family intramembrane serine protease [Bacillus tequilensis]	0	RMVO01P000095
MUF99541.1	71	DUF910 family protein	DUF910 family protein [Bacillus tequilensis]	0	RMVO01P000096
MUF99542.1	321	ROK family glucokinase	ROK family glucokinase [Bacillus tequilensis]	0	RMVO01P000097
MUF99543.1	638	LTA synthase family protein	LTA synthase family protein [Bacillus tequilensis]	0	RMVO01P000098
MUF99545.1	353	hypothetical protein	hypothetical protein ECC01_00520 [Bacillus tequilensis]	0	RMVO01P000099
MUF99546.1	104	MTH1187 family thiamine-binding protein	MTH1187 family thiamine-binding protein [Bacillus tequilensis]	0	RMVO01P000100
MUF99547.1	57	DUF2759 domain-containing protein	DUF2759 domain-containing protein [Bacillus tequilensis]	0	RMVO01P000101
MUF99548.1	211	MBL fold metallo-hydrolase	MBL fold metallo-hydrolase [Bacillus tequilensis]	0	RMVO01P000102
MUF99549.1	81	DUF2626 domain-containing protein	DUF2626 domain-containing protein [Bacillus tequilensis]	0	RMVO01P000103
MUF99550.1	126	Spx/MgsR family RNA polymerase-binding regulatory protein	Spx/MgsR family RNA polymerase-binding regulatory protein [Bacillus tequilensis]	0	RMVO01P000104
MUF99551.1	278	STAS domain-containing protein	STAS domain-containing protein [Bacillus tequilensis]	0	RMVO01P000105
MUF99552.1	442	HlyC/CorC family transporter	HlyC/CorC family transporter [Bacillus tequilensis]	0	RMVO01P000106
MUF99553.1	317	magnesium transporter	magnesium transporter [Bacillus tequilensis]	0	RMVO01P000107
MUF99554.1	65	CBS domain-containing protein	CBS domain-containing protein [Bacillus tequilensis]	0	RMVO01P000108
MUF99555.1	356	competence protein ComGA	competence protein ComGA [Bacillus tequilensis]	0	RMVO01P000109
MUF99556.1	345	type II secretion system F family protein	type II secretion system F family protein [Bacillus tequilensis]	0	RMVO01P000110
MUF99557.1	98	ComG operon protein 3	ComG operon protein 3 [Bacillus tequilensis]	0	RMVO01P000111
MUF99558.1	143	prepilin-type N-terminal cleavage/methylation domain-containing protein	prepilin-type N-terminal cleavage/methylation domain-containing protein [Bacillus tequilensis]	0	RMVO01P000112
MUF99559.1	115	ComG operon protein 5	ComG operon protein 5 [Bacillus tequilensis]	0	RMVO01P000113
MUF99560.1	127	competence protein ComG	competence protein ComG [Bacillus tequilensis]	0	RMVO01P000114
MUF99561.1	124	competence protein ComG	competence protein ComG [Bacillus tequilensis]	0	RMVO01P000115
MUF99562.1	59	YqzE family protein	YqzE family protein [Bacillus tequilensis]	0	RMVO01P000116
MUF99563.1	108	DUF3889 domain-containing protein	DUF3889 domain-containing protein [Bacillus tequilensis]	0	RMVO01P000117
MUF99564.1	253	amyloid fiber anchoring/assembly protein TapA	amyloid fiber anchoring/assembly protein TapA [Bacillus tequilensis]	0	RMVO01P000118
MUF99566.1	261	spore coat protein	spore coat protein [Bacillus tequilensis]	0	RMVO01P000119
MUF99568.1	57	DNA-binding anti-repressor SinI	DNA-binding anti-repressor SinI [Bacillus tequilensis]	0	RMVO01P000120
MUF99569.1	62	hypothetical protein	hypothetical protein ECC01_00645 [Bacillus tequilensis]	0	RMVO01P000121
MUF99570.1	264	hypothetical protein	hypothetical protein ECC01_00650 [Bacillus tequilensis]	0	RMVO01P000122
MUF99571.1	557	DEAD/DEAH box helicase	DEAD/DEAH box helicase [Bacillus tequilensis]	0	RMVO01P000123
MUF99572.1	362	glycine cleavage system aminomethyltransferase GcvT	glycine cleavage system aminomethyltransferase GcvT [Bacillus tequilensis]	0	RMVO01P000124
MUF99573.1	448	aminomethyl-transferring glycine dehydrogenase subunit GcvPA	aminomethyl-transferring glycine dehydrogenase subunit GcvPA [Bacillus tequilensis]	0	RMVO01P000125
MUF99574.1	488	glycine dehydrogenase subunit 2	glycine dehydrogenase subunit 2 [Bacillus tequilensis]	0	RMVO01P000126
MUF99575.1	126	rhodanese-like domain-containing protein	rhodanese-like domain-containing protein [Bacillus tequilensis]	0	RMVO01P000127
MUF99576.1	278	lipoate--protein ligase family protein	lipoate--protein ligase family protein [Bacillus tequilensis]	0	RMVO01P000128
MUF99577.1	142	transcriptional regulator MntR	transcriptional regulator MntR [Bacillus tequilensis]	0	RMVO01P000129
MUF99578.1	291	patatin-like phospholipase family protein	patatin-like phospholipase family protein [Bacillus tequilensis]	0	RMVO01P000130
MUF99579.1	131	hypothetical protein	hypothetical protein ECC01_00695 [Bacillus tequilensis]	0	RMVO01P000131
MUF99580.1	318	DUF1385 domain-containing protein	DUF1385 domain-containing protein [Bacillus tequilensis]	0	RMVO01P000132
MUF99581.1	178	hypothetical protein	hypothetical protein ECC01_00705 [Bacillus tequilensis]	0	RMVO01P000133
MUF99582.1	148	type II 3-dehydroquinate dehydratase	type II 3-dehydroquinate dehydratase [Bacillus tequilensis]	0	RMVO01P000134
MUF99583.1	353	aminopeptidase P family protein	aminopeptidase P family protein [Bacillus tequilensis]	0	RMVO01P000135
MUF99584.1	185	elongation factor P	elongation factor P [Bacillus tequilensis]	0	RMVO01P000136
MUF99585.1	93	DUF2619 domain-containing protein	DUF2619 domain-containing protein [Bacillus tequilensis]	0	RMVO01P000137
MUF99586.1	307	stage III sporulation protein AA	stage III sporulation protein AA [Bacillus tequilensis]	0	RMVO01P000138
MUF99587.1	171	stage III sporulation protein SpoAB	stage III sporulation protein SpoAB [Bacillus tequilensis]	0	RMVO01P000139
MUF99588.1	68	stage III sporulation protein AC	stage III sporulation protein AC [Bacillus tequilensis]	0	RMVO01P000140
MUF99589.1	133	stage III sporulation protein AD	stage III sporulation protein AD [Bacillus tequilensis]	0	RMVO01P000141
MUF99590.1	399	stage III sporulation protein AE	stage III sporulation protein AE [Bacillus tequilensis]	0	RMVO01P000142
MUF99591.1	206	stage III sporulation protein AF	stage III sporulation protein AF [Bacillus tequilensis]	0	RMVO01P000143
MUF99592.1	229	stage III sporulation protein AG	stage III sporulation protein AG [Bacillus tequilensis]	0	RMVO01P000144
MUF99593.1	218	SpoIIIAH-like family protein	SpoIIIAH-like family protein [Bacillus tequilensis]	0	RMVO01P000145
MUF99594.1	159	acetyl-CoA carboxylase biotin carboxyl carrier protein	acetyl-CoA carboxylase biotin carboxyl carrier protein [Bacillus tequilensis]	0	RMVO01P000146
MUF99595.1	450	acetyl-CoA carboxylase biotin carboxylase subunit	acetyl-CoA carboxylase biotin carboxylase subunit [Bacillus tequilensis]	0	RMVO01P000147
MUF99596.1	135	Asp23/Gls24 family envelope stress response protein	Asp23/Gls24 family envelope stress response protein [Bacillus tequilensis]	0	RMVO01P000148
MUF99597.1	131	transcription antitermination factor NusB	transcription antitermination factor NusB [Bacillus tequilensis]	0	RMVO01P000149
MUF99598.1	283	bifunctional methylenetetrahydrofolate dehydrogenase/methenyltetrahydrofolate cyclohydrolase FolD	bifunctional methylenetetrahydrofolate dehydrogenase/methenyltetrahydrofolate cyclohydrolase FolD [Bacillus tequilensis]	0	RMVO01P000150
MUF99599.1	448	exodeoxyribonuclease VII large subunit	exodeoxyribonuclease VII large subunit [Bacillus tequilensis]	0	RMVO01P000151
MUF99600.1	84	exodeoxyribonuclease VII small subunit	exodeoxyribonuclease VII small subunit [Bacillus tequilensis]	0	RMVO01P000152
MUF99601.1	296	polyprenyl synthetase family protein	polyprenyl synthetase family protein [Bacillus tequilensis]	0	RMVO01P000153
MUF99602.1	633	1-deoxy-D-xylulose-5-phosphate synthase	1-deoxy-D-xylulose-5-phosphate synthase [Bacillus tequilensis]	0	RMVO01P000154
MUF99603.1	281	TlyA family RNA methyltransferase	TlyA family RNA methyltransferase [Bacillus tequilensis]	0	RMVO01P000155
MUF99604.1	149	arginine repressor ArgR	arginine repressor ArgR [Bacillus tequilensis]	0	RMVO01P000156
MUF99605.1	576	DNA repair protein RecN	DNA repair protein RecN [Bacillus tequilensis]	0	RMVO01P000157
MUF99606.1	426	SpoIVB peptidase	SpoIVB peptidase [Bacillus tequilensis]	0	RMVO01P000158
MUF99607.1	267	sporulation transcription factor Spo0A	sporulation transcription factor Spo0A [Bacillus tequilensis]	0	RMVO01P000159
MUF99608.1	372	NADH-dependent flavin oxidoreductase	NADH-dependent flavin oxidoreductase [Bacillus tequilensis]	0	RMVO01P000160
MUF99609.1	50	hypothetical protein	hypothetical protein ECC01_00845 [Bacillus tequilensis]	0	RMVO01P000161
MUF99610.1	98	hypothetical protein	hypothetical protein ECC01_00850 [Bacillus tequilensis]	0	RMVO01P000162
MUF99611.1	206	N-acetylmuramoyl-L-alanine amidase	N-acetylmuramoyl-L-alanine amidase [Bacillus tequilensis]	0	RMVO01P000163
MUF99612.1	243	glycerophosphodiester phosphodiesterase	glycerophosphodiester phosphodiesterase [Bacillus tequilensis]	0	RMVO01P000164
MUF99613.1	393	acetyl-CoA C-acetyltransferase	acetyl-CoA C-acetyltransferase [Bacillus tequilensis]	0	RMVO01P000165
MUF99614.1	287	3-hydroxybutyryl-CoA dehydrogenase	3-hydroxybutyryl-CoA dehydrogenase [Bacillus tequilensis]	0	RMVO01P000166
MUF99615.1	379	acyl-CoA dehydrogenase	acyl-CoA dehydrogenase [Bacillus tequilensis]	0	RMVO01P000167
MUF99616.1	372	citrate synthase	citrate synthase [Bacillus tequilensis]	0	RMVO01P000168
MUF99617.1	472	bifunctional 2-methylcitrate dehydratase/aconitate hydratase	bifunctional 2-methylcitrate dehydratase/aconitate hydratase [Bacillus tequilensis]	0	RMVO01P000169
MUF99618.1	301	methylisocitrate lyase	methylisocitrate lyase [Bacillus tequilensis]	0	RMVO01P000170
MUF99619.1	77	DUF2627 domain-containing protein	DUF2627 domain-containing protein [Bacillus tequilensis]	0	RMVO01P000171
MUF99620.1	692	PAS domain-containing protein	PAS domain-containing protein [Bacillus tequilensis]	0	RMVO01P000172
MUF99621.1	299	phosphate butyryltransferase	phosphate butyryltransferase [Bacillus tequilensis]	0	RMVO01P000173
MUF99622.1	364	Glu/Leu/Phe/Val dehydrogenase	Glu/Leu/Phe/Val dehydrogenase [Bacillus tequilensis]	0	RMVO01P000174
MUF99623.1	363	butyrate kinase	butyrate kinase [Bacillus tequilensis]	0	RMVO01P000175
MUF99624.1	474	dihydrolipoyl dehydrogenase	dihydrolipoyl dehydrogenase [Bacillus tequilensis]	0	RMVO01P000176
MUF99625.1	330	3-methyl-2-oxobutanoate dehydrogenase subunit alpha	3-methyl-2-oxobutanoate dehydrogenase subunit alpha [Bacillus tequilensis]	0	RMVO01P000177
MUF99626.1	327	2-oxoisovalerate dehydrogenase subunit beta	2-oxoisovalerate dehydrogenase subunit beta [Bacillus tequilensis]	0	RMVO01P000178
MUF99627.1	424	branched-chain alpha-keto dehydrogenase complex dihydrolipoyllysine-residue (2-methylpropanoyl)transferase	branched-chain alpha-keto dehydrogenase complex dihydrolipoyllysine-residue (2-methylpropanoyl)transferase [Bacillus tequilensis]	0	RMVO01P000179
MUF99628.1	278	multidrug efflux transcriptional regulator BmrR	multidrug efflux transcriptional regulator BmrR [Bacillus tequilensis]	0	RMVO01P000180
MUF99629.1	389	multidrug efflux MFS transporter Bmr	multidrug efflux MFS transporter Bmr [Bacillus tequilensis]	0	RMVO01P000181
MUF99630.1	297	diacylglycerol kinase family lipid kinase	diacylglycerol kinase family lipid kinase [Bacillus tequilensis]	0	RMVO01P000182
MUF99631.1	145	BrxA/BrxB family bacilliredoxin	BrxA/BrxB family bacilliredoxin [Bacillus tequilensis]	0	RMVO01P000183
MUF99632.1	255	arginine ABC transporter substrate-binding protein ArtP	arginine ABC transporter substrate-binding protein ArtP [Bacillus tequilensis]	0	RMVO01P000184
MUF99633.1	219	amino acid ABC transporter permease	amino acid ABC transporter permease [Bacillus tequilensis]	0	RMVO01P000185
MUF99634.1	240	amino acid ABC transporter ATP-binding protein	amino acid ABC transporter ATP-binding protein [Bacillus tequilensis]	0	RMVO01P000186
MUF99635.1	322	aromatic acid exporter family protein	aromatic acid exporter family protein [Bacillus tequilensis]	0	RMVO01P000187
MUF99636.1	176	L,D-transpeptidase	L,D-transpeptidase [Bacillus tequilensis]	0	RMVO01P000188
MUF99637.1	140	methylmalonyl-CoA epimerase	methylmalonyl-CoA epimerase [Bacillus tequilensis]	0	RMVO01P000189
MUF99639.1	371	M20/M25/M40 family metallo-hydrolase	M20/M25/M40 family metallo-hydrolase [Bacillus tequilensis]	0	RMVO01P000190
MUF99641.1	275	membrane protein insertase YidC	membrane protein insertase YidC [Bacillus tequilensis]	0	RMVO01P000191
MUF99643.1	414	DNA polymerase IV	DNA polymerase IV [Bacillus tequilensis]	0	RMVO01P000192
MUF99644.1	469	NADP-dependent phosphogluconate dehydrogenase	NADP-dependent phosphogluconate dehydrogenase [Bacillus tequilensis]	0	RMVO01P000193
MUF99645.1	489	glucose-6-phosphate dehydrogenase	glucose-6-phosphate dehydrogenase [Bacillus tequilensis]	0	RMVO01P000194
MUF99646.1	307	ribonuclease Z	ribonuclease Z [Bacillus tequilensis]	0	RMVO01P000195
MUF99647.1	49	50S ribosomal protein L33	50S ribosomal protein L33 [Bacillus tequilensis]	0	RMVO01P000196
MUF99648.1	253	alpha/beta hydrolase	alpha/beta hydrolase [Bacillus tequilensis]	0	RMVO01P000197
MUF99649.1	338	NADPH dehydrogenase NamA	NADPH dehydrogenase NamA [Bacillus tequilensis]	0	RMVO01P000198
MUF99650.1	547	M20/M25/M40 family metallo-hydrolase	M20/M25/M40 family metallo-hydrolase [Bacillus tequilensis]	0	RMVO01P000199
MUF99651.1	278	pyrroline-5-carboxylate reductase	pyrroline-5-carboxylate reductase [Bacillus tequilensis]	0	RMVO01P000200
MUF99652.1	319	MBL fold metallo-hydrolase	MBL fold metallo-hydrolase [Bacillus tequilensis]	0	RMVO01P000201
MUF99653.1	259	SDR family oxidoreductase	SDR family oxidoreductase [Bacillus tequilensis]	0	RMVO01P000202
MUF99654.1	448	D-serine ammonia-lyase	D-serine ammonia-lyase [Bacillus tequilensis]	0	RMVO01P000203
MUF99655.1	319	type I pantothenate kinase	type I pantothenate kinase [Bacillus tequilensis]	0	RMVO01P000204
MUF99656.1	128	hypothetical protein	hypothetical protein ECC01_01080 [Bacillus tequilensis]	0	RMVO01P000205
MUF99657.1	417	MFS transporter	MFS transporter [Bacillus tequilensis]	0	RMVO01P000206
MUF99659.1	412	DNA polymerase IV	DNA polymerase IV [Bacillus tequilensis]	0	RMVO01P000207
MUF99660.1	112	YolD-like family protein	YolD-like family protein [Bacillus tequilensis]	0	RMVO01P000208
MUF99661.1	156	GNAT family N-acetyltransferase	GNAT family N-acetyltransferase [Bacillus tequilensis]	0	RMVO01P000209
MUF99662.1	114	antibiotic biosynthesis monooxygenase	antibiotic biosynthesis monooxygenase [Bacillus tequilensis]	0	RMVO01P000210
MUF99663.1	343	GNAT family N-acetyltransferase	GNAT family N-acetyltransferase [Bacillus tequilensis]	0	RMVO01P000211
MUF99664.1	107	hypothetical protein	hypothetical protein ECC01_01120 [Bacillus tequilensis]	0	RMVO01P000212
MUF99665.1	79	DUF2552 domain-containing protein	DUF2552 domain-containing protein [Bacillus tequilensis]	0	RMVO01P000213
MUF99667.1	74	DUF3886 domain-containing protein	DUF3886 domain-containing protein [Bacillus tequilensis]	0	RMVO01P000214
MUF99668.1	306	aldo/keto reductase	aldo/keto reductase [Bacillus tequilensis]	0	RMVO01P000215
MUF99669.1	40	Z-ring formation inhibitor MciZ	Z-ring formation inhibitor MciZ [Bacillus tequilensis]	0	RMVO01P000216
MUF99670.1	185	ADP-ribose pyrophosphatase	ADP-ribose pyrophosphatase [Bacillus tequilensis]	0	RMVO01P000217
MUF99671.1	387	TIGR00375 family protein	TIGR00375 family protein [Bacillus tequilensis]	0	RMVO01P000218
MUF99672.1	116	helix-turn-helix transcriptional regulator	helix-turn-helix transcriptional regulator [Bacillus tequilensis]	0	RMVO01P000219
MUF99673.1	329	asparaginase	asparaginase [Bacillus tequilensis]	0	RMVO01P000220
MUF99674.1	475	aspartate ammonia-lyase	aspartate ammonia-lyase [Bacillus tequilensis]	0	RMVO01P000221
MUF99675.1	468	Na+/H+ antiporter NhaC	Na+/H+ antiporter NhaC [Bacillus tequilensis]	0	RMVO01P000222
MUF99676.1	439	NAD-dependent malic enzyme	NAD-dependent malic enzyme [Bacillus tequilensis]	0	RMVO01P000223
MUF99677.1	71	hypothetical protein	hypothetical protein ECC01_01185 [Bacillus tequilensis]	0	RMVO01P000224
MUF99678.1	214	stage II sporulation protein M	stage II sporulation protein M [Bacillus tequilensis]	0	RMVO01P000225
MUF99679.1	149	transcriptional repressor	transcriptional repressor [Bacillus tequilensis]	0	RMVO01P000226
MUF99680.1	75	DUF4227 family protein	DUF4227 family protein [Bacillus tequilensis]	0	RMVO01P000227
MUF99681.1	296	site-specific tyrosine recombinase XerD	site-specific tyrosine recombinase XerD [Bacillus tequilensis]	0	RMVO01P000228
MUF99682.1	394	phosphopentomutase	phosphopentomutase [Bacillus tequilensis]	0	RMVO01P000229
MUF99683.1	271	purine nucleoside phosphorylase I, inosine and guanosine-specific	purine nucleoside phosphorylase I, inosine and guanosine-specific [Bacillus tequilensis]	0	RMVO01P000230
MUF99684.1	389	D-alanyl-D-alanine carboxypeptidase	D-alanyl-D-alanine carboxypeptidase [Bacillus tequilensis]	0	RMVO01P000231
MUF99685.1	117	anti-sigma F factor antagonist	anti-sigma F factor antagonist [Bacillus tequilensis]	0	RMVO01P000232
MUF99686.1	146	anti-sigma F factor	anti-sigma F factor [Bacillus tequilensis]	0	RMVO01P000233
MUF99687.1	255	RNA polymerase sporulation sigma factor SigF	RNA polymerase sporulation sigma factor SigF [Bacillus tequilensis]	0	RMVO01P000234
MUF99689.1	141	stage V sporulation protein AB	stage V sporulation protein AB [Bacillus tequilensis]	0	RMVO01P000235
MUF99690.1	150	stage V sporulation protein AC	stage V sporulation protein AC [Bacillus tequilensis]	0	RMVO01P000236
MUF99691.1	338	stage V sporulation protein AD	stage V sporulation protein AD [Bacillus tequilensis]	0	RMVO01P000237
MUF99692.1	116	stage V sporulation protein AE	stage V sporulation protein AE [Bacillus tequilensis]	0	RMVO01P000238
MUF99693.1	203	stage V sporulation protein AE	stage V sporulation protein AE [Bacillus tequilensis]	0	RMVO01P000239
MUF99694.1	493	stage V sporulation protein AF	stage V sporulation protein AF [Bacillus tequilensis]	0	RMVO01P000240
MUF99696.1	290	DUF1002 domain-containing protein	DUF1002 domain-containing protein [Bacillus tequilensis]	0	RMVO01P000241
MUF99697.1	143	peptidylprolyl isomerase	peptidylprolyl isomerase [Bacillus tequilensis]	0	RMVO01P000242
MUF99698.1	70	spore germination protein	spore germination protein [Bacillus tequilensis]	0	RMVO01P000243
MUF99699.1	68	hypothetical protein	hypothetical protein ECC01_01300 [Bacillus tequilensis]	0	RMVO01P000244
MUF99700.1	184	signal peptidase I	signal peptidase I [Bacillus tequilensis]	0	RMVO01P000245
MUF99701.1	114	hypothetical protein	hypothetical protein ECC01_01310 [Bacillus tequilensis]	0	RMVO01P000246
MUF99702.1	361	bifunctional diaminohydroxyphosphoribosylaminopyrimidine deaminase/5-amino-6-(5-phosphoribosylamino)uracil reductase RibD	bifunctional diaminohydroxyphosphoribosylaminopyrimidine deaminase/5-amino-6-(5-phosphoribosylamino)uracil reductase RibD [Bacillus tequilensis]	0	RMVO01P000247
MUF99703.1	215	riboflavin synthase subunit alpha	riboflavin synthase subunit alpha [Bacillus tequilensis]	0	RMVO01P000248
MUF99704.1	398	bifunctional 3,4-dihydroxy-2-butanone-4-phosphate synthase/GTP cyclohydrolase II	bifunctional 3,4-dihydroxy-2-butanone-4-phosphate synthase/GTP cyclohydrolase II [Bacillus tequilensis]	0	RMVO01P000249
MUF99705.1	154	6,7-dimethyl-8-ribityllumazine synthase	6,7-dimethyl-8-ribityllumazine synthase [Bacillus tequilensis]	0	RMVO01P000250
MUF99706.1	124	GNAT family N-acetyltransferase RibT	GNAT family N-acetyltransferase RibT [Bacillus tequilensis]	0	RMVO01P000251
MUF99707.1	174	DUF309 domain-containing protein	DUF309 domain-containing protein [Bacillus tequilensis]	0	RMVO01P000252
MUF99709.1	197	SMC-Scp complex subunit ScpB	SMC-Scp complex subunit ScpB [Bacillus tequilensis]	0	RMVO01P000253
MUF99710.1	179	DUF3907 family protein	DUF3907 family protein [Bacillus tequilensis]	0	RMVO01P000254
MUF99711.1	382	D-alanyl-D-alanine carboxypeptidase	D-alanyl-D-alanine carboxypeptidase [Bacillus tequilensis]	0	RMVO01P000255
MUF99712.1	196	spore maturation protein SbmA	spore maturation protein SbmA [Bacillus tequilensis]	0	RMVO01P000256
MUF99713.1	178	spore maturation protein SpmB	spore maturation protein SpmB [Bacillus tequilensis]	0	RMVO01P000257
MUF99714.1	244	23S rRNA pseudouridine(2605) synthase RluB	23S rRNA pseudouridine(2605) synthase RluB [Bacillus tequilensis]	0	RMVO01P000258
MUF99715.1	179	thiol-disulfide oxidoreductase ResA	thiol-disulfide oxidoreductase ResA [Bacillus tequilensis]	0	RMVO01P000259
MUF99716.1	542	cytochrome c biogenesis protein ResB	cytochrome c biogenesis protein ResB [Bacillus tequilensis]	0	RMVO01P000260
MUF99717.1	391	cytochrome c biogenesis protein ResC	cytochrome c biogenesis protein ResC [Bacillus tequilensis]	0	RMVO01P000261
MUF99718.1	240	DNA-binding response regulator ResD	DNA-binding response regulator ResD [Bacillus tequilensis]	0	RMVO01P000262
MUF99719.1	589	sensor histidine kinase ResE	sensor histidine kinase ResE [Bacillus tequilensis]	0	RMVO01P000263
MUF99720.1	194	RNA polymerase sigma factor SigX	RNA polymerase sigma factor SigX [Bacillus tequilensis]	0	RMVO01P000264
MUF99721.1	367	sigma-X negative effector	sigma-X negative effector [Bacillus tequilensis]	0	RMVO01P000265
MUF99722.1	255	type I 3-dehydroquinate dehydratase	type I 3-dehydroquinate dehydratase [Bacillus tequilensis]	0	RMVO01P000266
MUF99723.1	525	D-3-phosphoglycerate dehydrogenase	D-3-phosphoglycerate dehydrogenase [Bacillus tequilensis]	0	RMVO01P000267
MUF99724.1	190	ECF transporter S component	ECF transporter S component [Bacillus tequilensis]	0	RMVO01P000268
MUF99725.1	82	ferredoxin	ferredoxin [Bacillus tequilensis]	0	RMVO01P000269
MUF99727.1	496	ATP-dependent DNA helicase RecQ	ATP-dependent DNA helicase RecQ [Bacillus tequilensis]	0	RMVO01P000270
MUF99728.1	189	CPBP family intramembrane metalloprotease	CPBP family intramembrane metalloprotease [Bacillus tequilensis]	0	RMVO01P000271
MUF99729.1	243	LysM peptidoglycan-binding domain-containing protein	LysM peptidoglycan-binding domain-containing protein [Bacillus tequilensis]	0	RMVO01P000272
MUF99730.1	147	DUF2663 family protein	DUF2663 family protein [Bacillus tequilensis]	0	RMVO01P000273
MUF99731.1	259	metallophosphoesterase	metallophosphoesterase [Bacillus tequilensis]	0	RMVO01P000274
MUF99732.1	194	genetic competence negative regulator	genetic competence negative regulator [Bacillus tequilensis]	0	RMVO01P000275
MUF99733.1	424	NAD-specific glutamate dehydrogenase	NAD-specific glutamate dehydrogenase [Bacillus tequilensis]	0	RMVO01P000276
MUF99734.1	324	YpdA family putative bacillithiol disulfide reductase	YpdA family putative bacillithiol disulfide reductase [Bacillus tequilensis]	0	RMVO01P000277
MUF99735.1	218	intramembrane metalloprotease PrsW	intramembrane metalloprotease PrsW [Bacillus tequilensis]	0	RMVO01P000278
MUF99736.1	305	spore cortex-lytic enzyme	spore cortex-lytic enzyme [Bacillus tequilensis]	0	RMVO01P000279
MUF99737.1	450	germination protein YpeB	germination protein YpeB [Bacillus tequilensis]	0	RMVO01P000280
MUF99738.1	217	flagellar brake protein	flagellar brake protein [Bacillus tequilensis]	0	RMVO01P000281
MUF99739.1	58	hypothetical protein	hypothetical protein ECC01_01500 [Bacillus tequilensis]	0	RMVO01P000282
MUF99740.1	224	(d)CMP kinase	(d)CMP kinase [Bacillus tequilensis]	0	RMVO01P000283
MUF99741.1	382	30S ribosomal protein S1	30S ribosomal protein S1 [Bacillus tequilensis]	0	RMVO01P000284
MUF99742.1	349	type 2 isopentenyl-diphosphate Delta-isomerase	type 2 isopentenyl-diphosphate Delta-isomerase [Bacillus tequilensis]	0	RMVO01P000285
MUF99743.1	43	YpzI family protein	YpzI family protein [Bacillus tequilensis]	0	RMVO01P000286
MUF99744.1	199	hypothetical protein	hypothetical protein ECC01_01525 [Bacillus tequilensis]	0	RMVO01P000287
MUF99745.1	297	hypothetical protein	hypothetical protein ECC01_01530 [Bacillus tequilensis]	0	RMVO01P000288
MUF99746.1	64	hypothetical protein	hypothetical protein ECC01_01535 [Bacillus tequilensis]	0	RMVO01P000289
MUF99747.1	436	ribosome-associated GTPase EngA	ribosome-associated GTPase EngA [Bacillus tequilensis]	0	RMVO01P000290
MUF99748.1	345	NAD(P)H-dependent glycerol-3-phosphate dehydrogenase	NAD(P)H-dependent glycerol-3-phosphate dehydrogenase [Bacillus tequilensis]	0	RMVO01P000291
MUF99749.1	67	DUF2768 domain-containing protein	DUF2768 domain-containing protein [Bacillus tequilensis]	0	RMVO01P000292
MUF99750.1	244	hypothetical protein	hypothetical protein ECC01_01555 [Bacillus tequilensis]	0	RMVO01P000293
MUF99751.1	492	stage IV sporulation protein A	stage IV sporulation protein A [Bacillus tequilensis]	0	RMVO01P000294
MUF99752.1	92	DNA-binding protein HU 1	DNA-binding protein HU 1 [Bacillus tequilensis]	0	RMVO01P000295
MUF99753.1	190	GTP cyclohydrolase I FolE	GTP cyclohydrolase I FolE [Bacillus tequilensis]	0	RMVO01P000296
MUF99754.1	75	trp RNA-binding attenuation protein MtrB	trp RNA-binding attenuation protein MtrB [Bacillus tequilensis]	0	RMVO01P000297
MUF99755.1	251	Heptaprenyl diphosphate synthase component 1	Heptaprenyl diphosphate synthase component 1 [Bacillus tequilensis]	0	RMVO01P000298
MUF99756.1	233	demethylmenaquinone methyltransferase	demethylmenaquinone methyltransferase [Bacillus tequilensis]	0	RMVO01P000299
MUF99757.1	348	Heptaprenyl diphosphate synthase component 2	Heptaprenyl diphosphate synthase component 2 [Bacillus tequilensis]	0	RMVO01P000300
MUF99758.1	149	nucleoside-diphosphate kinase	nucleoside-diphosphate kinase [Bacillus tequilensis]	0	RMVO01P000301
MUF99759.1	256	protein-glutamate O-methyltransferase CheR	protein-glutamate O-methyltransferase CheR [Bacillus tequilensis]	0	RMVO01P000302
MUF99760.1	390	chorismate synthase	chorismate synthase [Bacillus tequilensis]	0	RMVO01P000303
MUF99761.1	362	3-dehydroquinate synthase	3-dehydroquinate synthase [Bacillus tequilensis]	0	RMVO01P000304
MUF99762.1	127	chorismate mutase	chorismate mutase [Bacillus tequilensis]	0	RMVO01P000305
MUF99763.1	515	anthranilate synthase component I	anthranilate synthase component I [Bacillus tequilensis]	0	RMVO01P000306
MUF99764.1	338	anthranilate phosphoribosyltransferase	anthranilate phosphoribosyltransferase [Bacillus tequilensis]	0	RMVO01P000307
MUF99765.1	250	indole-3-glycerol phosphate synthase TrpC	indole-3-glycerol phosphate synthase TrpC [Bacillus tequilensis]	0	RMVO01P000308
MUF99766.1	215	phosphoribosylanthranilate isomerase	phosphoribosylanthranilate isomerase [Bacillus tequilensis]	0	RMVO01P000309
MUF99767.1	400	tryptophan synthase subunit beta	tryptophan synthase subunit beta [Bacillus tequilensis]	0	RMVO01P000310
MUF99768.1	267	tryptophan synthase subunit alpha	tryptophan synthase subunit alpha [Bacillus tequilensis]	0	RMVO01P000311
MUF99769.1	360	histidinol-phosphate transaminase	histidinol-phosphate transaminase [Bacillus tequilensis]	0	RMVO01P000312
MUF99770.1	371	prephenate dehydrogenase	prephenate dehydrogenase [Bacillus tequilensis]	0	RMVO01P000313
MUF99771.1	428	3-phosphoshikimate 1-carboxyvinyltransferase	3-phosphoshikimate 1-carboxyvinyltransferase [Bacillus tequilensis]	0	RMVO01P000314
MUF99772.1	423	tetratricopeptide repeat protein	tetratricopeptide repeat protein [Bacillus tequilensis]	0	RMVO01P000315
MUF99773.1	179	YpiB family protein	YpiB family protein [Bacillus tequilensis]	0	RMVO01P000316
MUF99774.1	148	DUF2487 family protein	DUF2487 family protein [Bacillus tequilensis]	0	RMVO01P000317
MUF99775.1	167	ubiquinol-cytochrome c reductase iron-sulfur subunit	ubiquinol-cytochrome c reductase iron-sulfur subunit [Bacillus tequilensis]	0	RMVO01P000318
MUF99776.1	224	menaquinol-cytochrome c reductase cytochrome b subunit	menaquinol-cytochrome c reductase cytochrome b subunit [Bacillus tequilensis]	0	RMVO01P000319
MUF99777.1	255	c-type cytochrome	c-type cytochrome [Bacillus tequilensis]	0	RMVO01P000320
MUF99779.1	264	sporulation protein YpjB	sporulation protein YpjB [Bacillus tequilensis]	0	RMVO01P000321
MUF99780.1	290	YitT family protein	YitT family protein [Bacillus tequilensis]	0	RMVO01P000322
MUF99781.1	111	nucleotide pyrophosphohydrolase	nucleotide pyrophosphohydrolase [Bacillus tequilensis]	0	RMVO01P000323
MUF99782.1	267	4-hydroxy-tetrahydrodipicolinate reductase	4-hydroxy-tetrahydrodipicolinate reductase [Bacillus tequilensis]	0	RMVO01P000324
MUF99783.1	137	methylglyoxal synthase	methylglyoxal synthase [Bacillus tequilensis]	0	RMVO01P000325
MUF99784.1	236	bacillithiol biosynthesis deacetylase BshB1	bacillithiol biosynthesis deacetylase BshB1 [Bacillus tequilensis]	0	RMVO01P000326
MUF99785.1	377	N-acetyl-alpha-D-glucosaminyl L-malate synthase BshA	N-acetyl-alpha-D-glucosaminyl L-malate synthase BshA [Bacillus tequilensis]	0	RMVO01P000327
MUF99786.1	397	CCA tRNA nucleotidyltransferase	CCA tRNA nucleotidyltransferase [Bacillus tequilensis]	0	RMVO01P000328
MUF99787.1	325	bifunctional biotin--[acetyl-CoA-carboxylase] synthetase/biotin operon repressor	bifunctional biotin--[acetyl-CoA-carboxylase] synthetase/biotin operon repressor [Bacillus tequilensis]	0	RMVO01P000329
MUF99788.1	277	3-methyl-2-oxobutanoate hydroxymethyltransferase	3-methyl-2-oxobutanoate hydroxymethyltransferase [Bacillus tequilensis]	0	RMVO01P000330
MUF99789.1	286	pantoate--beta-alanine ligase	pantoate--beta-alanine ligase [Bacillus tequilensis]	0	RMVO01P000331
MUF99790.1	127	aspartate 1-decarboxylase	aspartate 1-decarboxylase [Bacillus tequilensis]	0	RMVO01P000332
MUF99791.1	931	ATP-dependent DNA helicase DinG	ATP-dependent DNA helicase DinG [Bacillus tequilensis]	0	RMVO01P000333
MUF99792.1	56	DUF4264 domain-containing protein	DUF4264 domain-containing protein [Bacillus tequilensis]	0	RMVO01P000334
MUF99793.1	161	hypothetical protein	hypothetical protein ECC01_01770 [Bacillus tequilensis]	0	RMVO01P000335
MUF99794.1	393	aspartate transaminase AspB	aspartate transaminase AspB [Bacillus tequilensis]	0	RMVO01P000336
MUF99796.1	232	DnaD domain-containing protein	DnaD domain-containing protein [Bacillus tequilensis]	0	RMVO01P000337
MUF99797.1	219	endonuclease III	endonuclease III [Bacillus tequilensis]	0	RMVO01P000338
MUF99798.1	164	hypothetical protein	hypothetical protein ECC01_01795 [Bacillus tequilensis]	0	RMVO01P000339
MUF99799.1	916	PBP1A family penicillin-binding protein	PBP1A family penicillin-binding protein [Bacillus tequilensis]	0	RMVO01P000340
MUF99800.1	206	Holliday junction resolvase RecU	Holliday junction resolvase RecU [Bacillus tequilensis]	0	RMVO01P000341
MUF99801.1	320	DUF2515 domain-containing protein	DUF2515 domain-containing protein [Bacillus tequilensis]	0	RMVO01P000342
MUF99802.1	34	acid-soluble spore protein SspM	acid-soluble spore protein SspM [Bacillus tequilensis]	0	RMVO01P000343
MUF99803.1	81	hypothetical protein	hypothetical protein ECC01_01820 [Bacillus tequilensis]	0	RMVO01P000344
MUF99804.1	123	DUF1798 family protein	DUF1798 family protein [Bacillus tequilensis]	0	RMVO01P000345
MUF99805.1	62	hypothetical protein	hypothetical protein ECC01_01830 [Bacillus tequilensis]	0	RMVO01P000346
MUF99806.1	125	hypothetical protein	hypothetical protein ECC01_01835 [Bacillus tequilensis]	0	RMVO01P000347
MUF99807.1	139	Hsp20/alpha crystallin family protein	Hsp20/alpha crystallin family protein [Bacillus tequilensis]	0	RMVO01P000348
MUF99809.1	749	DEAD/DEAH box helicase	DEAD/DEAH box helicase [Bacillus tequilensis]	0	RMVO01P000349
MUF99810.1	413	hypothetical protein	hypothetical protein ECC01_01855 [Bacillus tequilensis]	0	RMVO01P000350
MUF99811.1	42	hypothetical protein	hypothetical protein ECC01_01860 [Bacillus tequilensis]	0	RMVO01P000351
MUF99812.1	75	spore coat protein D	spore coat protein D [Bacillus tequilensis]	0	RMVO01P000352
MUF99814.1	98	cell division regulator GpsB	cell division regulator GpsB [Bacillus tequilensis]	0	RMVO01P000353
MUF99815.1	385	class I SAM-dependent RNA methyltransferase	class I SAM-dependent RNA methyltransferase [Bacillus tequilensis]	0	RMVO01P000354
MUF99816.1	50	YpzG family protein	YpzG family protein [Bacillus tequilensis]	0	RMVO01P000355
MUF99818.1	641	ATP-dependent DNA helicase	ATP-dependent DNA helicase [Bacillus tequilensis]	0	RMVO01P000356
MUF99819.1	254	2-dehydro-3-deoxy-D-gluconate 5-dehydrogenase KduD	2-dehydro-3-deoxy-D-gluconate 5-dehydrogenase KduD [Bacillus tequilensis]	0	RMVO01P000357
MUF99820.1	275	5-dehydro-4-deoxy-D-glucuronate isomerase	5-dehydro-4-deoxy-D-glucuronate isomerase [Bacillus tequilensis]	0	RMVO01P000358
MUF99821.1	339	LacI family DNA-binding transcriptional regulator	LacI family DNA-binding transcriptional regulator [Bacillus tequilensis]	0	RMVO01P000359
MUF99822.1	324	sugar kinase	sugar kinase [Bacillus tequilensis]	0	RMVO01P000360
MUF99823.1	196	bifunctional 4-hydroxy-2-oxoglutarate aldolase/2-dehydro-3-deoxy-phosphogluconate aldolase	bifunctional 4-hydroxy-2-oxoglutarate aldolase/2-dehydro-3-deoxy-phosphogluconate aldolase [Bacillus tequilensis]	0	RMVO01P000361
MUF99824.1	330	2-keto-3-deoxygluconate transporter	2-keto-3-deoxygluconate transporter [Bacillus tequilensis]	0	RMVO01P000362
MUF99825.1	501	carboxypeptidase	carboxypeptidase [Bacillus tequilensis]	0	RMVO01P000363
MUF99826.1	194	xanthine phosphoribosyltransferase	xanthine phosphoribosyltransferase [Bacillus tequilensis]	0	RMVO01P000364
MUF99827.1	438	xanthine permease	xanthine permease [Bacillus tequilensis]	0	RMVO01P000365
MUF99829.1	168	hypothetical protein	hypothetical protein ECC01_01955 [Bacillus tequilensis]	0	RMVO01P000366
MUF99830.1	29	Fur-regulated basic protein FbpC	Fur-regulated basic protein FbpC [Bacillus tequilensis]	0	RMVO01P000367
MUF99831.1	1193	hypothetical protein	hypothetical protein ECC01_01965 [Bacillus tequilensis]	0	RMVO01P000368
MUF99832.1	85	DUF2533 family protein	DUF2533 family protein [Bacillus tequilensis]	0	RMVO01P000369
MUF99833.1	48	hypothetical protein	hypothetical protein ECC01_01975 [Bacillus tequilensis]	0	RMVO01P000370
MUF99834.1	296	5'-3' exonuclease	5'-3' exonuclease [Bacillus tequilensis]	0	RMVO01P000371
MUF99835.1	42	small, acid-soluble spore protein L	small, acid-soluble spore protein L [Bacillus tequilensis]	0	RMVO01P000372
MUF99836.1	132	reverse transcriptase-like protein	reverse transcriptase-like protein [Bacillus tequilensis]	0	RMVO01P000373
MUF99837.1	229	VUT family protein	VUT family protein [Bacillus tequilensis]	0	RMVO01P000374
MUF99838.1	226	reverse transcriptase-like protein	reverse transcriptase-like protein [Bacillus tequilensis]	0	RMVO01P000375
MUF99839.1	60	zinc-finger domain-containing protein	zinc-finger domain-containing protein [Bacillus tequilensis]	0	RMVO01P000376
MUF99840.1	89	DUF2564 family protein	DUF2564 family protein [Bacillus tequilensis]	0	RMVO01P000377
MUF99841.1	60	transcriptional regulator DegR	transcriptional regulator DegR [Bacillus tequilensis]	0	RMVO01P000378
MUF99842.1	66	cold-shock protein	cold-shock protein [Bacillus tequilensis]	0	RMVO01P000379
MUF99843.1	48	hypothetical protein	hypothetical protein ECC01_02025 [Bacillus tequilensis]	0	RMVO01P000380
MUF99844.1	382	diglucosyl diacylglycerol synthase	diglucosyl diacylglycerol synthase [Bacillus tequilensis]	0	RMVO01P000381
MUF99845.1	301	homoserine O-succinyltransferase	homoserine O-succinyltransferase [Bacillus tequilensis]	0	RMVO01P000382
MUF99846.1	160	glutathione peroxidase	glutathione peroxidase [Bacillus tequilensis]	0	RMVO01P000383
MUF99847.1	205	HD domain-containing protein	HD domain-containing protein [Bacillus tequilensis]	0	RMVO01P000384
MUF99848.1	377	virulence factor	virulence factor [Bacillus tequilensis]	0	RMVO01P000385
MUF99849.1	558	dihydroxy-acid dehydratase	dihydroxy-acid dehydratase [Bacillus tequilensis]	0	RMVO01P000386
MUF99850.1	144	BrxA/BrxB family bacilliredoxin	BrxA/BrxB family bacilliredoxin [Bacillus tequilensis]	0	RMVO01P000387
MUF99851.1	257	hypothetical protein	hypothetical protein ECC01_02065 [Bacillus tequilensis]	0	RMVO01P000388
MUF99852.1	203	hypothetical protein	hypothetical protein ECC01_02070 [Bacillus tequilensis]	0	RMVO01P000389
MUF99853.1	177	phosphatidylglycerophosphatase A	phosphatidylglycerophosphatase A [Bacillus tequilensis]	0	RMVO01P000390
MUF99854.1	168	dihydrofolate reductase	dihydrofolate reductase [Bacillus tequilensis]	0	RMVO01P000391
MUF99855.1	206	1-acyl-sn-glycerol-3-phosphate acyltransferase	1-acyl-sn-glycerol-3-phosphate acyltransferase [Bacillus tequilensis]	0	RMVO01P000392
MUF99856.1	213	hemolysin III family protein	hemolysin III family protein [Bacillus tequilensis]	0	RMVO01P000393
MUF99857.1	331	AAA family ATPase	AAA family ATPase [Bacillus tequilensis]	0	RMVO01P000394
MUF99858.1	422	threonine ammonia-lyase IlvA	threonine ammonia-lyase IlvA [Bacillus tequilensis]	0	RMVO01P000395
MUF99859.1	83	DUF2535 family protein	DUF2535 family protein [Bacillus tequilensis]	0	RMVO01P000396
MUF99860.1	193	SCO family protein	SCO family protein [Bacillus tequilensis]	0	RMVO01P000397
MUF99861.1	255	hypothetical protein	hypothetical protein ECC01_02115 [Bacillus tequilensis]	0	RMVO01P000398
MUF99862.1	187	DUF2140 family protein	DUF2140 family protein [Bacillus tequilensis]	0	RMVO01P000399
MUF99863.1	64	hypothetical protein	hypothetical protein ECC01_02125 [Bacillus tequilensis]	0	RMVO01P000400
MUF99864.1	445	MATE family efflux transporter	MATE family efflux transporter [Bacillus tequilensis]	0	RMVO01P000401
MUF99865.1	141	MarR family transcriptional regulator	MarR family transcriptional regulator [Bacillus tequilensis]	0	RMVO01P000402
MUF99866.1	177	peptide-methionine (S)-S-oxide reductase MsrA	peptide-methionine (S)-S-oxide reductase MsrA [Bacillus tequilensis]	0	RMVO01P000403
MUF99867.1	144	peptide-methionine (R)-S-oxide reductase MsrB	peptide-methionine (R)-S-oxide reductase MsrB [Bacillus tequilensis]	0	RMVO01P000404
MUF99868.1	341	polysaccharide biosynthesis protein	polysaccharide biosynthesis protein [Bacillus tequilensis]	0	RMVO01P000405
MUF99869.1	382	phytase	phytase [Bacillus tequilensis]	0	RMVO01P000406
MUF99870.1	317	hypothetical protein	hypothetical protein ECC01_02160 [Bacillus tequilensis]	0	RMVO01P000407
MUF99871.1	133	spore crust protein CgeA	spore crust protein CgeA [Bacillus tequilensis]	0	RMVO01P000408
MUF99872.1	101	protein CgeC	protein CgeC [Bacillus tequilensis]	0	RMVO01P000409
MUF99873.1	426	glycosyltransferase family 2 protein	glycosyltransferase family 2 protein [Bacillus tequilensis]	0	RMVO01P000410
MUF99874.1	259	GNAT family N-acetyltransferase	GNAT family N-acetyltransferase [Bacillus tequilensis]	0	RMVO01P000411
MUF99875.1	77	YjcZ family sporulation protein	YjcZ family sporulation protein [Bacillus tequilensis]	0	RMVO01P000412
MUF99876.1	51	hypothetical protein	hypothetical protein ECC01_02190 [Bacillus tequilensis]	0	RMVO01P000413
MUF99877.1	444	aspartate aminotransferase family protein	aspartate aminotransferase family protein [Bacillus tequilensis]	0	RMVO01P000414
MUF99878.1	229	CoA transferase subunit A	CoA transferase subunit A [Bacillus tequilensis]	0	RMVO01P000415
MUF99879.1	217	3-oxoacid CoA-transferase subunit B	3-oxoacid CoA-transferase subunit B [Bacillus tequilensis]	0	RMVO01P000416
MUF99880.1	436	peptidase	peptidase [Bacillus tequilensis]	0	RMVO01P000417
MUF99881.1	275	putative beta-lysine N-acetyltransferase	putative beta-lysine N-acetyltransferase [Bacillus tequilensis]	0	RMVO01P000418
MUF99882.1	471	L-lysine 2,3-aminomutase	L-lysine 2,3-aminomutase [Bacillus tequilensis]	0	RMVO01P000419
MUF99883.1	92	YokU family protein	YokU family protein [Bacillus tequilensis]	0	RMVO01P000420
MUF99884.1	74	YozE family protein	YozE family protein [Bacillus tequilensis]	0	RMVO01P000421
MUF99886.1	226	hypothetical protein	hypothetical protein ECC01_02240 [Bacillus tequilensis]	0	RMVO01P000422
MUF99887.1	47	hypothetical protein	hypothetical protein ECC01_02245 [Bacillus tequilensis]	0	RMVO01P000423
MUF99888.1	58	YozD family protein	YozD family protein [Bacillus tequilensis]	0	RMVO01P000424
MUF99889.1	203	phosphatase PAP2 family protein	phosphatase PAP2 family protein [Bacillus tequilensis]	0	RMVO01P000425
MUF99890.1	104	hypothetical protein	hypothetical protein ECC01_02260 [Bacillus tequilensis]	0	RMVO01P000426
MUF99891.1	41	hypothetical protein	hypothetical protein ECC01_02265 [Bacillus tequilensis]	0	RMVO01P000427
MUF99892.1	233	purine-nucleoside phosphorylase	purine-nucleoside phosphorylase [Bacillus tequilensis]	0	RMVO01P000428
MUF99893.1	273	D-alanyl-D-alanine carboxypeptidase family protein	D-alanyl-D-alanine carboxypeptidase family protein [Bacillus tequilensis]	0	RMVO01P000429
MUF99894.1	83	hypothetical protein	hypothetical protein ECC01_02280 [Bacillus tequilensis]	0	RMVO01P000430
MUF99895.1	233	class I SAM-dependent methyltransferase	class I SAM-dependent methyltransferase [Bacillus tequilensis]	0	RMVO01P000431
MUF99896.1	466	PDZ domain-containing protein	PDZ domain-containing protein [Bacillus tequilensis]	0	RMVO01P000432
MUF99897.1	496	symporter	symporter [Bacillus tequilensis]	0	RMVO01P000433
MUF99898.1	66	DUF3311 domain-containing protein	DUF3311 domain-containing protein [Bacillus tequilensis]	0	RMVO01P000434
MUF99899.1	303	ring-cleaving dioxygenase	ring-cleaving dioxygenase [Bacillus tequilensis]	0	RMVO01P000435
MUF99900.1	200	alpha/beta hydrolase	alpha/beta hydrolase [Bacillus tequilensis]	0	RMVO01P000436
MUF99901.1	202	nitroreductase family protein	nitroreductase family protein [Bacillus tequilensis]	0	RMVO01P000437
MUF99902.1	112	winged helix-turn-helix transcriptional regulator	winged helix-turn-helix transcriptional regulator [Bacillus tequilensis]	0	RMVO01P000438
MUF99903.1	129	tautomerase family protein	tautomerase family protein [Bacillus tequilensis]	0	RMVO01P000439
MUF99904.1	444	gluconate permease	gluconate permease [Bacillus tequilensis]	0	RMVO01P000440
MUF99905.1	78	hypothetical protein	hypothetical protein ECC01_02335 [Bacillus tequilensis]	0	RMVO01P000441
MUF99906.1	153	spore gernimation protein GerT	spore gernimation protein GerT [Bacillus tequilensis]	0	RMVO01P000442
MUF99907.1	298	EamA family transporter RarD	EamA family transporter RarD [Bacillus tequilensis]	0	RMVO01P000443
MUF99908.1	92	hypothetical protein	hypothetical protein ECC01_02350 [Bacillus tequilensis]	0	RMVO01P000444
MUF99909.1	116	DUF1806 family protein	DUF1806 family protein [Bacillus tequilensis]	0	RMVO01P000445
MUF99910.1	221	bacillithiol biosynthesis deacetylase BshB2	bacillithiol biosynthesis deacetylase BshB2 [Bacillus tequilensis]	0	RMVO01P000446
MUF99911.1	282	STAS domain-containing protein	STAS domain-containing protein [Bacillus tequilensis]	0	RMVO01P000447
MUF99912.1	452	MATE family efflux transporter	MATE family efflux transporter [Bacillus tequilensis]	0	RMVO01P000448
MUF99914.1	405	glycosyl transferase family 1	glycosyl transferase family 1 [Bacillus tequilensis]	0	RMVO01P000449
MUF99915.1	414	LysM peptidoglycan-binding domain-containing protein	LysM peptidoglycan-binding domain-containing protein [Bacillus tequilensis]	0	RMVO01P000450
MUF99916.1	196	superoxide dismutase-like protein YojM	superoxide dismutase-like protein YojM [Bacillus tequilensis]	0	RMVO01P000451
MUF99917.1	304	MoxR family ATPase	MoxR family ATPase [Bacillus tequilensis]	0	RMVO01P000452
MUF99918.1	638	nitric oxide reductase activation protein NorD	nitric oxide reductase activation protein NorD [Bacillus tequilensis]	0	RMVO01P000453
MUF99919.1	944	2-oxoglutarate dehydrogenase E1 component	2-oxoglutarate dehydrogenase E1 component [Bacillus tequilensis]	0	RMVO01P000454
MUF99920.1	417	2-oxoglutarate dehydrogenase complex dihydrolipoyllysine-residue succinyltransferase	2-oxoglutarate dehydrogenase complex dihydrolipoyllysine-residue succinyltransferase [Bacillus tequilensis]	0	RMVO01P000455
MUF99921.1	321	bile acid:sodium symporter family protein	bile acid:sodium symporter family protein [Bacillus tequilensis]	0	RMVO01P000456
MUF99922.1	445	sodium-dependent transporter	sodium-dependent transporter [Bacillus tequilensis]	0	RMVO01P000457
MUF99923.1	281	superoxide dismutase	superoxide dismutase [Bacillus tequilensis]	0	RMVO01P000458
MUF99924.1	632	squalene--hopene cyclase	squalene--hopene cyclase [Bacillus tequilensis]	0	RMVO01P000459
MUF99925.1	495	aldehyde dehydrogenase DhaS	aldehyde dehydrogenase DhaS [Bacillus tequilensis]	0	RMVO01P000460
MUF99926.1	67	hypothetical protein	hypothetical protein ECC01_02440 [Bacillus tequilensis]	0	RMVO01P000461
MUF99927.1	114	hypothetical protein	hypothetical protein ECC01_02445 [Bacillus tequilensis]	0	RMVO01P000462
MUF99928.1	77	hypothetical protein	hypothetical protein ECC01_02450 [Bacillus tequilensis]	0	RMVO01P000463
MUF99929.1	87	hypothetical protein	hypothetical protein ECC01_02455 [Bacillus tequilensis]	0	RMVO01P000464
MUF99930.1	158	Hsp20/alpha crystallin family protein	Hsp20/alpha crystallin family protein [Bacillus tequilensis]	0	RMVO01P000465
MUF99931.1	75	hypothetical protein	hypothetical protein ECC01_02465 [Bacillus tequilensis]	0	RMVO01P000466
MUF99932.1	110	hypothetical protein	hypothetical protein ECC01_02470 [Bacillus tequilensis]	0	RMVO01P000467
MUF99933.1	163	TraR/DksA family transcriptional regulator	TraR/DksA family transcriptional regulator [Bacillus tequilensis]	0	RMVO01P000468
MUF99934.1	208	FMN-dependent NADH-azoreductase 1	FMN-dependent NADH-azoreductase 1 [Bacillus tequilensis]	0	RMVO01P000469
MUF99935.1	60	hypothetical protein	hypothetical protein ECC01_02485 [Bacillus tequilensis]	0	RMVO01P000470
MUF99936.1	591	DNA helicase RecQ	DNA helicase RecQ [Bacillus tequilensis]	0	RMVO01P000471
MUF99937.1	287	LysM peptidoglycan-binding domain-containing protein	LysM peptidoglycan-binding domain-containing protein [Bacillus tequilensis]	0	RMVO01P000472
MUF99938.1	199	response regulator transcription factor	response regulator transcription factor [Bacillus tequilensis]	0	RMVO01P000473
MUF99939.1	370	sensor histidine kinase	sensor histidine kinase [Bacillus tequilensis]	0	RMVO01P000474
MUF99940.1	352	fatty acid desaturase	fatty acid desaturase [Bacillus tequilensis]	0	RMVO01P000475
MUF99941.1	325	LD-carboxypeptidase	LD-carboxypeptidase [Bacillus tequilensis]	0	RMVO01P000476
MUF99942.1	165	N-acetyltransferase	N-acetyltransferase [Bacillus tequilensis]	0	RMVO01P000477
MUF99943.1	260	hypothetical protein	hypothetical protein ECC01_02530 [Bacillus tequilensis]	0	RMVO01P000478
MUF99944.1	178	DUF420 domain-containing protein	DUF420 domain-containing protein [Bacillus tequilensis]	0	RMVO01P000479
MUF99945.1	225	lysozyme family protein	lysozyme family protein [Bacillus tequilensis]	0	RMVO01P000480
MUF99946.1	107	helix-turn-helix transcriptional regulator	helix-turn-helix transcriptional regulator [Bacillus tequilensis]	0	RMVO01P000481
MUF99947.1	181	kinase	kinase [Bacillus tequilensis]	0	RMVO01P000482
MUF99948.1	312	YafY family transcriptional regulator	YafY family transcriptional regulator [Bacillus tequilensis]	0	RMVO01P000483
MUF99949.1	160	AraC family transcriptional regulator	AraC family transcriptional regulator [Bacillus tequilensis]	0	RMVO01P000484
MUF99950.1	233	MBL fold metallo-hydrolase	MBL fold metallo-hydrolase [Bacillus tequilensis]	0	RMVO01P000485
MUF99951.1	191	TetR/AcrR family transcriptional regulator	TetR/AcrR family transcriptional regulator [Bacillus tequilensis]	0	RMVO01P000486
MUF99952.1	247	GNAT family N-acetyltransferase	GNAT family N-acetyltransferase [Bacillus tequilensis]	0	RMVO01P000487
MUF99954.1	110	chaperone CsaA	chaperone CsaA [Bacillus tequilensis]	0	RMVO01P000488
MUF99955.1	478	flavin monoamine oxidase family protein	flavin monoamine oxidase family protein [Bacillus tequilensis]	0	RMVO01P000489
MUF99956.1	185	SMI1/KNR4 family protein	SMI1/KNR4 family protein [Bacillus tequilensis]	0	RMVO01P000490
MUF99957.1	78	hypothetical protein	hypothetical protein ECC01_02605 [Bacillus tequilensis]	0	RMVO01P000491
MUF99958.1	66	hypothetical protein	hypothetical protein ECC01_02610 [Bacillus tequilensis]	0	RMVO01P000492
MUF99959.1	376	tetratricopeptide repeat protein	tetratricopeptide repeat protein [Bacillus tequilensis]	0	RMVO01P000493
MUF99960.1	60	hypothetical protein	hypothetical protein ECC01_02620 [Bacillus tequilensis]	0	RMVO01P000494
MUF99961.1	124	hypothetical protein	hypothetical protein ECC01_02630 [Bacillus tequilensis]	0	RMVO01P000495
MUF99962.1	121	hypothetical protein	hypothetical protein ECC01_02640 [Bacillus tequilensis]	0	RMVO01P000496
MUF99963.1	62	hypothetical protein	hypothetical protein ECC01_02645 [Bacillus tequilensis]	0	RMVO01P000497
MUF99964.1	233	hypothetical protein	hypothetical protein ECC01_02650 [Bacillus tequilensis]	0	RMVO01P000498
MUF99967.1	54	hypothetical protein	hypothetical protein ECC01_02670 [Bacillus tequilensis]	0	RMVO01P000499
MUF99968.1	210	hypothetical protein	hypothetical protein ECC01_02675 [Bacillus tequilensis]	0	RMVO01P000500
MUF99969.1	79	TM2 domain-containing protein	TM2 domain-containing protein [Bacillus tequilensis]	0	RMVO01P000501
MUF99970.1	213	1,4-beta-xylanase	1,4-beta-xylanase [Bacillus tequilensis]	0	RMVO01P000502
MUF99971.1	866	phosphoenolpyruvate synthase	phosphoenolpyruvate synthase [Bacillus tequilensis]	0	RMVO01P000503
MUF99972.1	87	hypothetical protein	hypothetical protein ECC01_02705 [Bacillus tequilensis]	0	RMVO01P000504
MUF99973.1	77	hypothetical protein	hypothetical protein ECC01_02710 [Bacillus tequilensis]	0	RMVO01P000505
MUF99974.1	117	DUF3221 domain-containing protein	DUF3221 domain-containing protein [Bacillus tequilensis]	0	RMVO01P000506
MUF99975.1	306	class A beta-lactamase	class A beta-lactamase [Bacillus tequilensis]	0	RMVO01P000507
MUF99976.1	210	glutamine amidotransferase	glutamine amidotransferase [Bacillus tequilensis]	0	RMVO01P000508
MUF99977.1	143	hypothetical protein	hypothetical protein ECC01_02730 [Bacillus tequilensis]	0	RMVO01P000509
MUF99978.1	292	DMT family transporter	DMT family transporter [Bacillus tequilensis]	0	RMVO01P000510
MUF99979.1	290	LysR family transcriptional regulator	LysR family transcriptional regulator [Bacillus tequilensis]	0	RMVO01P000511
MUF99980.1	264	DUF817 domain-containing protein	DUF817 domain-containing protein [Bacillus tequilensis]	0	RMVO01P000512
MUF99981.1	78	helix-turn-helix transcriptional regulator	helix-turn-helix transcriptional regulator [Bacillus tequilensis]	0	RMVO01P000513
MUF99982.1	160	DUF2975 domain-containing protein	DUF2975 domain-containing protein [Bacillus tequilensis]	0	RMVO01P000514
MUF99983.1	303	hypothetical protein	hypothetical protein ECC01_02760 [Bacillus tequilensis]	0	RMVO01P000515
MUF99984.1	165	hypothetical protein	hypothetical protein ECC01_02765 [Bacillus tequilensis]	0	RMVO01P000516
MUF99985.1	160	DUF4944 domain-containing protein	DUF4944 domain-containing protein [Bacillus tequilensis]	0	RMVO01P000517
MUF99986.1	392	cupin domain-containing protein	cupin domain-containing protein [Bacillus tequilensis]	0	RMVO01P000518
MUF99987.1	101	hypothetical protein	hypothetical protein ECC01_02785 [Bacillus tequilensis]	0	RMVO01P000519
MUF99988.1	227	SOS response-associated peptidase	SOS response-associated peptidase [Bacillus tequilensis]	0	RMVO01P000520
MUF99989.1	345	polysaccharide lyase family 1 protein	polysaccharide lyase family 1 protein [Bacillus tequilensis]	0	RMVO01P000521
MUF99990.1	225	DUF1275 domain-containing protein	DUF1275 domain-containing protein [Bacillus tequilensis]	0	RMVO01P000522
MUF99991.1	232	expansin-YoaJ	expansin-YoaJ [Bacillus tequilensis]	0	RMVO01P000523
MUF99992.1	483	4-hydroxyphenylacetate 3-monooxygenase, oxygenase component	4-hydroxyphenylacetate 3-monooxygenase, oxygenase component [Bacillus tequilensis]	0	RMVO01P000524
MUF99993.1	561	HAMP domain-containing protein	HAMP domain-containing protein [Bacillus tequilensis]	0	RMVO01P000525
MUF99994.1	97	DUF4025 domain-containing protein	DUF4025 domain-containing protein [Bacillus tequilensis]	0	RMVO01P000526
MUF99995.1	40	biofilm-forming protein	biofilm-forming protein [Bacillus tequilensis]	0	RMVO01P000527
MUF99996.1	339	LacI family transcriptional regulator	LacI family transcriptional regulator [Bacillus tequilensis]	0	RMVO01P000528
MUF99997.1	309	TIM barrel protein	TIM barrel protein [Bacillus tequilensis]	0	RMVO01P000529
MUF99998.1	388	Gfo/Idh/MocA family oxidoreductase	Gfo/Idh/MocA family oxidoreductase [Bacillus tequilensis]	0	RMVO01P000530
MUF99999.1	484	sugar porter family MFS transporter	sugar porter family MFS transporter [Bacillus tequilensis]	0	RMVO01P000531
MUG00001.1	106	hypothetical protein	hypothetical protein ECC01_02855 [Bacillus tequilensis]	0	RMVO01P000532
MUG00002.1	680	molybdopterin oxidoreductase family protein	molybdopterin oxidoreductase family protein [Bacillus tequilensis]	0	RMVO01P000533
MUG00003.1	340	hydroxyacid dehydrogenase	hydroxyacid dehydrogenase [Bacillus tequilensis]	0	RMVO01P000534
MUG00004.1	487	sugar kinase	sugar kinase [Bacillus tequilensis]	0	RMVO01P000535
MUG00005.1	414	MFS transporter	MFS transporter [Bacillus tequilensis]	0	RMVO01P000536
MUG00006.1	183	MarR family transcriptional regulator	MarR family transcriptional regulator [Bacillus tequilensis]	0	RMVO01P000537
MUG00007.1	312	ABC transporter ATP-binding protein	ABC transporter ATP-binding protein [Bacillus tequilensis]	0	RMVO01P000538
MUG00008.1	248	ABC transporter permease	ABC transporter permease [Bacillus tequilensis]	0	RMVO01P000539
MUG00009.1	330	ABC transporter permease	ABC transporter permease [Bacillus tequilensis]	0	RMVO01P000540
MUG00010.1	177	GNAT family N-acetyltransferase	GNAT family N-acetyltransferase [Bacillus tequilensis]	0	RMVO01P000541
MUG00011.1	256	hypothetical protein	hypothetical protein ECC01_02905 [Bacillus tequilensis]	0	RMVO01P000542
MUG00012.1	102	DUF948 domain-containing protein	DUF948 domain-containing protein [Bacillus tequilensis]	0	RMVO01P000543
MUG00013.1	238	3-ketoacyl-ACP reductase	3-ketoacyl-ACP reductase [Bacillus tequilensis]	0	RMVO01P000544
MUG00015.1	297	Pyrroline-5-carboxylate reductase 1	Pyrroline-5-carboxylate reductase 1 [Bacillus tequilensis]	0	RMVO01P000545
MUG00016.1	371	glutamate 5-kinase	glutamate 5-kinase [Bacillus tequilensis]	0	RMVO01P000546
MUG00017.1	300	LysR family transcriptional regulator	LysR family transcriptional regulator [Bacillus tequilensis]	0	RMVO01P000547
MUG00018.1	1520	glutamate synthase large subunit	glutamate synthase large subunit [Bacillus tequilensis]	0	RMVO01P000548
MUG00019.1	493	glutamate synthase small subunit	glutamate synthase small subunit [Bacillus tequilensis]	0	RMVO01P000549
MUG00020.1	329	zinc-binding dehydrogenase	zinc-binding dehydrogenase [Bacillus tequilensis]	0	RMVO01P000550
MUG00021.1	285	LysR family transcriptional regulator	LysR family transcriptional regulator [Bacillus tequilensis]	0	RMVO01P000551
MUG00022.1	587	gamma-glutamyltransferase	gamma-glutamyltransferase [Bacillus tequilensis]	0	RMVO01P000552
MUG00023.1	76	helix-turn-helix domain-containing protein	helix-turn-helix domain-containing protein [Bacillus tequilensis]	0	RMVO01P000553
MUG00024.1	181	site-specific integrase	site-specific integrase [Bacillus tequilensis]	0	RMVO01P000554
MUG00025.1	181	hypothetical protein	hypothetical protein ECC01_02980 [Bacillus tequilensis]	0	RMVO01P000555
MUG00026.1	463	MATE family efflux transporter	MATE family efflux transporter [Bacillus tequilensis]	0	RMVO01P000556
MUG00027.1	325	aldose 1-epimerase	aldose 1-epimerase [Bacillus tequilensis]	0	RMVO01P000557
MUG00028.1	491	D-alanyl-D-alanine carboxypeptidase/D-alanyl-D-alanine-endopeptidase	D-alanyl-D-alanine carboxypeptidase/D-alanyl-D-alanine-endopeptidase [Bacillus tequilensis]	0	RMVO01P000558
MUG00032.1	130	DUF1360 domain-containing protein	DUF1360 domain-containing protein [Bacillus tequilensis]	0	RMVO01P000559
MUG00033.1	510	glycoside hydrolase family 10 protein	glycoside hydrolase family 10 protein [Bacillus tequilensis]	0	RMVO01P000560
MUG00035.1	380	acyl-CoA dehydrogenase	acyl-CoA dehydrogenase [Bacillus tequilensis]	0	RMVO01P000561
MUG00036.1	549	AMP-binding protein	AMP-binding protein [Bacillus tequilensis]	0	RMVO01P000562
MUG00037.1	444	acetyl-CoA carboxylase biotin carboxylase subunit	acetyl-CoA carboxylase biotin carboxylase subunit [Bacillus tequilensis]	0	RMVO01P000563
MUG00038.1	73	acetyl-CoA carboxylase biotin carboxyl carrier protein subunit	acetyl-CoA carboxylase biotin carboxyl carrier protein subunit [Bacillus tequilensis]	0	RMVO01P000564
MUG00039.1	299	hydroxymethylglutaryl-CoA lyase	hydroxymethylglutaryl-CoA lyase [Bacillus tequilensis]	0	RMVO01P000565
MUG00040.1	260	enoyl-CoA hydratase	enoyl-CoA hydratase [Bacillus tequilensis]	0	RMVO01P000566
MUG00041.1	511	acyl-CoA carboxylase subunit beta	acyl-CoA carboxylase subunit beta [Bacillus tequilensis]	0	RMVO01P000567
MUG00042.1	399	DHH family phosphoesterase	DHH family phosphoesterase [Bacillus tequilensis]	0	RMVO01P000568
MUG00043.1	198	DedA family protein	DedA family protein [Bacillus tequilensis]	0	RMVO01P000569
MUG00044.1	297	UTP--glucose-1-phosphate uridylyltransferase GalU	UTP--glucose-1-phosphate uridylyltransferase GalU [Bacillus tequilensis]	0	RMVO01P000570
MUG00045.1	148	GtrA family protein	GtrA family protein [Bacillus tequilensis]	0	RMVO01P000571
MUG00046.1	515	alpha-L-arabinofuranosidase	alpha-L-arabinofuranosidase [Bacillus tequilensis]	0	RMVO01P000572
MUG00047.1	422	glucuronoxylanase	glucuronoxylanase [Bacillus tequilensis]	0	RMVO01P000573
MUG00048.1	87	hypothetical protein	hypothetical protein ECC01_03095 [Bacillus tequilensis]	0	RMVO01P000574
MUG00049.1	499	endoglucanase	endoglucanase [Bacillus tequilensis]	0	RMVO01P000575
MUG00050.1	465	alanine:cation symporter family protein	alanine:cation symporter family protein [Bacillus tequilensis]	0	RMVO01P000576
MUG00051.1	117	hypothetical protein	hypothetical protein ECC01_03110 [Bacillus tequilensis]	0	RMVO01P000577
MUG00052.1	806	DNA topoisomerase IV subunit A	DNA topoisomerase IV subunit A [Bacillus tequilensis]	0	RMVO01P000578
MUG00053.1	655	DNA topoisomerase IV subunit B	DNA topoisomerase IV subunit B [Bacillus tequilensis]	0	RMVO01P000579
MUG00054.1	135	CoA-binding protein	CoA-binding protein [Bacillus tequilensis]	0	RMVO01P000580
MUG00055.1	193	glycerol-3-phosphate 1-O-acyltransferase PlsY	glycerol-3-phosphate 1-O-acyltransferase PlsY [Bacillus tequilensis]	0	RMVO01P000581
MUG00056.1	95	hypothetical protein	hypothetical protein ECC01_03135 [Bacillus tequilensis]	0	RMVO01P000582
MUG00057.1	99	hypothetical protein	hypothetical protein ECC01_03140 [Bacillus tequilensis]	0	RMVO01P000583
MUG00058.1	138	YbgC/FadM family acyl-CoA thioesterase	YbgC/FadM family acyl-CoA thioesterase [Bacillus tequilensis]	0	RMVO01P000584
MUG00059.1	83	small acid-soluble spore protein Tlp	small acid-soluble spore protein Tlp [Bacillus tequilensis]	0	RMVO01P000585
MUG00060.1	48	acid-soluble spore protein SspN	acid-soluble spore protein SspN [Bacillus tequilensis]	0	RMVO01P000586
MUG00061.1	41	FbpB family small basic protein	FbpB family small basic protein [Bacillus tequilensis]	0	RMVO01P000587
MUG00062.1	170	redoxin domain-containing protein	redoxin domain-containing protein [Bacillus tequilensis]	0	RMVO01P000588
MUG00063.1	909	aconitate hydratase AcnA	aconitate hydratase AcnA [Bacillus tequilensis]	0	RMVO01P000589
MUG00065.1	48	small acid-soluble spore protein P	small acid-soluble spore protein P [Bacillus tequilensis]	0	RMVO01P000590
MUG00066.1	130	Hsp20/alpha crystallin family protein	Hsp20/alpha crystallin family protein [Bacillus tequilensis]	0	RMVO01P000591
MUG00067.1	142	DUF2621 domain-containing protein	DUF2621 domain-containing protein [Bacillus tequilensis]	0	RMVO01P000592
MUG00068.1	163	DUF1453 family protein	DUF1453 family protein [Bacillus tequilensis]	0	RMVO01P000593
MUG00069.1	120	response regulator	response regulator [Bacillus tequilensis]	0	RMVO01P000594
MUG00070.1	235	cytochrome c-type biogenesis protein CcdA	cytochrome c-type biogenesis protein CcdA [Bacillus tequilensis]	0	RMVO01P000595
MUG00072.1	72	YneF family protein	YneF family protein [Bacillus tequilensis]	0	RMVO01P000596
MUG00073.1	148	sporulation inhibitor of replication protein SirA	sporulation inhibitor of replication protein SirA [Bacillus tequilensis]	0	RMVO01P000597
MUG00074.1	667	transketolase	transketolase [Bacillus tequilensis]	0	RMVO01P000598
MUG00075.1	77	DUF896 domain-containing protein	DUF896 domain-containing protein [Bacillus tequilensis]	0	RMVO01P000599
MUG00076.1	217	recombinase family protein	recombinase family protein [Bacillus tequilensis]	0	RMVO01P000600
MUG00077.1	105	cell division suppressor protein YneA	cell division suppressor protein YneA [Bacillus tequilensis]	0	RMVO01P000601
MUG00078.1	205	repressor LexA	repressor LexA [Bacillus tequilensis]	0	RMVO01P000602
MUG00079.1	144	metallothiol transferase FosB	metallothiol transferase FosB [Bacillus tequilensis]	0	RMVO01P000603
MUG00080.1	179	DUF2512 family protein	DUF2512 family protein [Bacillus tequilensis]	0	RMVO01P000604
MUG00081.1	252	hypothetical protein	hypothetical protein ECC01_03265 [Bacillus tequilensis]	0	RMVO01P000605
MUG00082.1	122	hypothetical protein	hypothetical protein ECC01_03270 [Bacillus tequilensis]	0	RMVO01P000606
MUG00083.1	546	hypothetical protein	hypothetical protein ECC01_03275 [Bacillus tequilensis]	0	RMVO01P000607
MUG00084.1	205	DUF4166 domain-containing protein	DUF4166 domain-containing protein [Bacillus tequilensis]	0	RMVO01P000608
MUG00085.1	268	hypothetical protein	hypothetical protein ECC01_03285 [Bacillus tequilensis]	0	RMVO01P000609
MUG00086.1	404	Ger(x)C family spore germination protein	Ger(x)C family spore germination protein [Bacillus tequilensis]	0	RMVO01P000610
MUG00087.1	363	spore gernimation protein	spore gernimation protein [Bacillus tequilensis]	0	RMVO01P000611
MUG00088.1	520	spore germination protein	spore germination protein [Bacillus tequilensis]	0	RMVO01P000612
MUG00089.1	62	hypothetical protein	hypothetical protein ECC01_03305 [Bacillus tequilensis]	0	RMVO01P000613
MUG00090.1	144	SRPBCC domain-containing protein	SRPBCC domain-containing protein [Bacillus tequilensis]	0	RMVO01P000614
MUG00091.1	132	hypothetical protein	hypothetical protein ECC01_03315 [Bacillus tequilensis]	0	RMVO01P000615
MUG00092.1	62	twin-arginine translocase TatA/TatE family subunit	twin-arginine translocase TatA/TatE family subunit [Bacillus tequilensis]	0	RMVO01P000616
MUG00093.1	74	spore coat protein C	spore coat protein C [Bacillus tequilensis]	0	RMVO01P000617
MUG00094.1	118	hypothetical protein	hypothetical protein ECC01_03335 [Bacillus tequilensis]	0	RMVO01P000618
MUG00095.1	240	hypothetical protein	hypothetical protein ECC01_03340 [Bacillus tequilensis]	0	RMVO01P000619
MUG00096.1	95	hypothetical protein	hypothetical protein ECC01_03345 [Bacillus tequilensis]	0	RMVO01P000620
MUG00097.1	279	thymidylate synthase	thymidylate synthase [Bacillus tequilensis]	0	RMVO01P000621
MUG00098.1	54	hypothetical protein	hypothetical protein ECC01_03355 [Bacillus tequilensis]	0	RMVO01P000622
MUG00099.1	86	hypothetical protein	hypothetical protein ECC01_03360 [Bacillus tequilensis]	0	RMVO01P000623
MUG00100.1	144	dUTP diphosphatase	dUTP diphosphatase [Bacillus tequilensis]	0	RMVO01P000624
MUG00101.1	153	DUF2691 family protein	DUF2691 family protein [Bacillus tequilensis]	0	RMVO01P000625
MUG00102.1	141	endonuclease	endonuclease [Bacillus tequilensis]	0	RMVO01P000626
MUG00103.1	394	alanine racemase	alanine racemase [Bacillus tequilensis]	0	RMVO01P000627
MUG00104.1	471	sugar porter family MFS transporter	sugar porter family MFS transporter [Bacillus tequilensis]	0	RMVO01P000628
MUG00105.1	499	xylulokinase	xylulokinase [Bacillus tequilensis]	0	RMVO01P000629
MUG00106.1	445	xylose isomerase	xylose isomerase [Bacillus tequilensis]	0	RMVO01P000630
MUG00107.1	384	ROK family protein	ROK family protein [Bacillus tequilensis]	0	RMVO01P000631
MUG00108.1	533	glycoside hydrolase family 43 protein	glycoside hydrolase family 43 protein [Bacillus tequilensis]	0	RMVO01P000632
MUG00109.1	463	MFS transporter	MFS transporter [Bacillus tequilensis]	0	RMVO01P000633
MUG00110.1	156	nucleotidyltransferase family protein	nucleotidyltransferase family protein [Bacillus tequilensis]	0	RMVO01P000634
MUG00111.1	91	hypothetical protein	hypothetical protein ECC01_03435 [Bacillus tequilensis]	0	RMVO01P000635
MUG00113.1	213	DUF3885 domain-containing protein	DUF3885 domain-containing protein [Bacillus tequilensis]	0	RMVO01P000636
MUG00114.1	170	GNAT family N-acetyltransferase	GNAT family N-acetyltransferase [Bacillus tequilensis]	0	RMVO01P000637
MUG00116.1	84	hypothetical protein	hypothetical protein ECC01_03470 [Bacillus tequilensis]	0	RMVO01P000638
MUG00117.1	357	toxin	toxin [Bacillus tequilensis]	0	RMVO01P000639
MUG00118.1	162	hypothetical protein	hypothetical protein ECC01_03480 [Bacillus tequilensis]	0	RMVO01P000640
MUG00119.1	96	hypothetical protein	hypothetical protein ECC01_03485 [Bacillus tequilensis]	0	RMVO01P000641
MUG00120.1	444	type I glutamate--ammonia ligase	type I glutamate--ammonia ligase [Bacillus tequilensis]	0	RMVO01P000642
MUG00121.1	135	transcriptional repressor GlnR	transcriptional repressor GlnR [Bacillus tequilensis]	0	RMVO01P000643
MUG00122.1	421	aminotransferase class I/II-fold pyridoxal phosphate-dependent enzyme	aminotransferase class I/II-fold pyridoxal phosphate-dependent enzyme [Bacillus tequilensis]	0	RMVO01P000644
MUG00123.1	420	GTPase HflX	GTPase HflX [Bacillus tequilensis]	0	RMVO01P000645
MUG00124.1	322	stage V sporulation protein K	stage V sporulation protein K [Bacillus tequilensis]	0	RMVO01P000646
MUG00125.1	255	N-acetylmuramoyl-L-alanine amidase	N-acetylmuramoyl-L-alanine amidase [Bacillus tequilensis]	0	RMVO01P000647
MUG00126.1	206	hypothetical protein	hypothetical protein ECC01_03525 [Bacillus tequilensis]	0	RMVO01P000648
MUG00127.1	329	class 1b ribonucleoside-diphosphate reductase subunit beta	class 1b ribonucleoside-diphosphate reductase subunit beta [Bacillus tequilensis]	0	RMVO01P000649
MUG00128.1	700	class 1b ribonucleoside-diphosphate reductase subunit alpha	class 1b ribonucleoside-diphosphate reductase subunit alpha [Bacillus tequilensis]	0	RMVO01P000650
MUG00129.1	130	class Ib ribonucleoside-diphosphate reductase assembly flavoprotein NrdI	class Ib ribonucleoside-diphosphate reductase assembly flavoprotein NrdI [Bacillus tequilensis]	0	RMVO01P000651
MUG00130.1	76	hypothetical protein	hypothetical protein ECC01_03545 [Bacillus tequilensis]	0	RMVO01P000652
MUG00131.1	90	hypothetical protein	hypothetical protein ECC01_03550 [Bacillus tequilensis]	0	RMVO01P000653
MUG00132.1	73	RNA chaperone Hfq	RNA chaperone Hfq [Bacillus tequilensis]	0	RMVO01P000654
MUG00133.1	314	tRNA (adenosine(37)-N6)-dimethylallyltransferase MiaA	tRNA (adenosine(37)-N6)-dimethylallyltransferase MiaA [Bacillus tequilensis]	0	RMVO01P000655
MUG00134.1	137	hypothetical protein	hypothetical protein ECC01_03565 [Bacillus tequilensis]	0	RMVO01P000656
MUG00135.1	81	hypothetical protein	hypothetical protein ECC01_03570 [Bacillus tequilensis]	0	RMVO01P000657
MUG00136.1	105	multidrug efflux SMR transporter subunit EbrA	multidrug efflux SMR transporter subunit EbrA [Bacillus tequilensis]	0	RMVO01P000658
MUG00137.1	117	multidrug efflux SMR transporter subunit EbrB	multidrug efflux SMR transporter subunit EbrB [Bacillus tequilensis]	0	RMVO01P000659
MUG00138.1	150	OsmC family protein	OsmC family protein [Bacillus tequilensis]	0	RMVO01P000660
MUG00139.1	235	hypothetical protein	hypothetical protein ECC01_03590 [Bacillus tequilensis]	0	RMVO01P000661
MUG00140.1	77	WYL domain-containing protein	WYL domain-containing protein [Bacillus tequilensis]	0	RMVO01P000662
MUG00141.1	442	serine protease	serine protease [Bacillus tequilensis]	0	RMVO01P000663
MUG00142.1	274	MBL fold metallo-hydrolase	MBL fold metallo-hydrolase [Bacillus tequilensis]	0	RMVO01P000664
MUG00143.1	118	hypothetical protein	hypothetical protein ECC01_03610 [Bacillus tequilensis]	0	RMVO01P000665
MUG00144.1	405	cytochrome P450	cytochrome P450 [Bacillus tequilensis]	0	RMVO01P000666
MUG00145.1	2543	methyltransferase	methyltransferase [Bacillus tequilensis]	0	RMVO01P000667
MUG00147.1	4266	SDR family NAD(P)-dependent oxidoreductase	SDR family NAD(P)-dependent oxidoreductase [Bacillus tequilensis]	0	RMVO01P000668
MUG00148.1	4538	SDR family NAD(P)-dependent oxidoreductase	SDR family NAD(P)-dependent oxidoreductase [Bacillus tequilensis]	0	RMVO01P000669
MUG00149.1	5040	amino acid adenylation domain-containing protein	amino acid adenylation domain-containing protein [Bacillus tequilensis]	0	RMVO01P000670
MUG00150.1	249	enoyl-CoA hydratase	enoyl-CoA hydratase [Bacillus tequilensis]	0	RMVO01P000671
MUG00151.1	259	enoyl-CoA hydratase/isomerase	enoyl-CoA hydratase/isomerase [Bacillus tequilensis]	0	RMVO01P000672
MUG00152.1	420	hydroxymethylglutaryl-CoA synthase family protein	hydroxymethylglutaryl-CoA synthase family protein [Bacillus tequilensis]	0	RMVO01P000673
MUG00153.1	415	polyketide biosynthesis malonyl-ACP decarboxylase PksF	polyketide biosynthesis malonyl-ACP decarboxylase PksF [Bacillus tequilensis]	0	RMVO01P000674
MUG00154.1	82	acyl carrier protein	acyl carrier protein [Bacillus tequilensis]	0	RMVO01P000675
MUG00155.1	767	ACP S-malonyltransferase	ACP S-malonyltransferase [Bacillus tequilensis]	0	RMVO01P000676
MUG00156.1	324	acyltransferase domain-containing protein	acyltransferase domain-containing protein [Bacillus tequilensis]	0	RMVO01P000677
MUG00157.1	288	ACP S-malonyltransferase	ACP S-malonyltransferase [Bacillus tequilensis]	0	RMVO01P000678
MUG00158.1	88	hypothetical protein	hypothetical protein ECC01_03685 [Bacillus tequilensis]	0	RMVO01P000679
MUG00159.1	225	MBL fold metallo-hydrolase	MBL fold metallo-hydrolase [Bacillus tequilensis]	0	RMVO01P000680
MUG00160.1	205	TetR family transcriptional regulator	TetR family transcriptional regulator [Bacillus tequilensis]	0	RMVO01P000681
MUG00161.1	185	hypothetical protein	hypothetical protein ECC01_03700 [Bacillus tequilensis]	0	RMVO01P000682
MUG00163.1	627	DNA mismatch repair endonuclease MutL	DNA mismatch repair endonuclease MutL [Bacillus tequilensis]	0	RMVO01P000683
MUG00164.1	858	DNA mismatch repair protein MutS	DNA mismatch repair protein MutS [Bacillus tequilensis]	0	RMVO01P000684
MUG00165.1	181	outer spore coat protein CotE	outer spore coat protein CotE [Bacillus tequilensis]	0	RMVO01P000685
MUG00166.1	143	hypothetical protein	hypothetical protein ECC01_03725 [Bacillus tequilensis]	0	RMVO01P000686
MUG00167.1	509	tRNA (N6-isopentenyl adenosine(37)-C2)-methylthiotransferase MiaB	tRNA (N6-isopentenyl adenosine(37)-C2)-methylthiotransferase MiaB [Bacillus tequilensis]	0	RMVO01P000687
MUG00168.1	392	glycine C-acetyltransferase	glycine C-acetyltransferase [Bacillus tequilensis]	0	RMVO01P000688
MUG00169.1	347	L-threonine 3-dehydrogenase	L-threonine 3-dehydrogenase [Bacillus tequilensis]	0	RMVO01P000689
MUG00170.1	86	stage V sporulation protein SpoVS	stage V sporulation protein SpoVS [Bacillus tequilensis]	0	RMVO01P000690
MUG00171.1	264	TIGR00282 family metallophosphoesterase	TIGR00282 family metallophosphoesterase [Bacillus tequilensis]	0	RMVO01P000691
MUG00172.1	520	ribonuclease Y	ribonuclease Y [Bacillus tequilensis]	0	RMVO01P000692
MUG00173.1	391	beta-lactamase family protein	beta-lactamase family protein [Bacillus tequilensis]	0	RMVO01P000693
MUG00174.1	348	recombinase RecA	recombinase RecA [Bacillus tequilensis]	0	RMVO01P000694
MUG00175.1	416	competence/damage-inducible protein A	competence/damage-inducible protein A [Bacillus tequilensis]	0	RMVO01P000695
MUG00176.1	193	CDP-diacylglycerol--glycerol-3-phosphate 3-phosphatidyltransferase	CDP-diacylglycerol--glycerol-3-phosphate 3-phosphatidyltransferase [Bacillus tequilensis]	0	RMVO01P000696
MUG00177.1	304	helix-turn-helix domain-containing protein	helix-turn-helix domain-containing protein [Bacillus tequilensis]	0	RMVO01P000697
MUG00178.1	263	DUF3388 domain-containing protein	DUF3388 domain-containing protein [Bacillus tequilensis]	0	RMVO01P000698
MUG00179.1	85	DUF3243 domain-containing protein	DUF3243 domain-containing protein [Bacillus tequilensis]	0	RMVO01P000699
MUG00180.1	242	SDR family oxidoreductase	SDR family oxidoreductase [Bacillus tequilensis]	0	RMVO01P000700
MUG00181.1	428	insulinase family protein	insulinase family protein [Bacillus tequilensis]	0	RMVO01P000701
MUG00182.1	426	insulinase family protein	insulinase family protein [Bacillus tequilensis]	0	RMVO01P000702
MUG00183.1	403	MFS transporter	MFS transporter [Bacillus tequilensis]	0	RMVO01P000703
MUG00184.1	241	GntR family transcriptional regulator	GntR family transcriptional regulator [Bacillus tequilensis]	0	RMVO01P000704
MUG00185.1	787	DNA translocase FtsK	DNA translocase FtsK [Bacillus tequilensis]	0	RMVO01P000705
MUG00186.1	70	hypothetical protein	hypothetical protein ECC01_03825 [Bacillus tequilensis]	0	RMVO01P000706
MUG00187.1	245	translocation-enhancing protein TepA	translocation-enhancing protein TepA [Bacillus tequilensis]	0	RMVO01P000707
MUG00188.1	555	ribonuclease J	ribonuclease J [Bacillus tequilensis]	0	RMVO01P000708
MUG00189.1	290	4-hydroxy-tetrahydrodipicolinate synthase	4-hydroxy-tetrahydrodipicolinate synthase [Bacillus tequilensis]	0	RMVO01P000709
MUG00190.1	404	aspartate kinase	aspartate kinase [Bacillus tequilensis]	0	RMVO01P000710
MUG00191.1	346	aspartate-semialdehyde dehydrogenase	aspartate-semialdehyde dehydrogenase [Bacillus tequilensis]	0	RMVO01P000711
MUG00192.1	200	dipicolinate synthase subunit B	dipicolinate synthase subunit B [Bacillus tequilensis]	0	RMVO01P000712
MUG00193.1	297	dipicolinic acid synthetase subunit A	dipicolinic acid synthetase subunit A [Bacillus tequilensis]	0	RMVO01P000713
MUG00194.1	85	YlmC/YmxH family sporulation protein	YlmC/YmxH family sporulation protein [Bacillus tequilensis]	0	RMVO01P000714
MUG00195.1	409	insulinase family protein	insulinase family protein [Bacillus tequilensis]	0	RMVO01P000715
MUG00196.1	319	hypothetical protein	hypothetical protein ECC01_03875 [Bacillus tequilensis]	0	RMVO01P000716
MUG00197.1	705	polyribonucleotide nucleotidyltransferase	polyribonucleotide nucleotidyltransferase [Bacillus tequilensis]	0	RMVO01P000717
MUG00198.1	89	30S ribosomal protein S15	30S ribosomal protein S15 [Bacillus tequilensis]	0	RMVO01P000718
MUG00199.1	316	bifunctional riboflavin kinase/FAD synthetase	bifunctional riboflavin kinase/FAD synthetase [Bacillus tequilensis]	0	RMVO01P000719
MUG00200.1	309	tRNA pseudouridine(55) synthase TruB	tRNA pseudouridine(55) synthase TruB [Bacillus tequilensis]	0	RMVO01P000720
MUG00201.1	117	30S ribosome-binding factor RbfA	30S ribosome-binding factor RbfA [Bacillus tequilensis]	0	RMVO01P000721
MUG00202.1	92	DUF503 domain-containing protein	DUF503 domain-containing protein [Bacillus tequilensis]	0	RMVO01P000722
MUG00203.1	716	translation initiation factor IF-2	translation initiation factor IF-2 [Bacillus tequilensis]	0	RMVO01P000723
MUG00204.1	100	YlxQ family RNA-binding protein	YlxQ family RNA-binding protein [Bacillus tequilensis]	0	RMVO01P000724
MUG00205.1	91	YlxR family protein	YlxR family protein [Bacillus tequilensis]	0	RMVO01P000725
MUG00206.1	371	transcription termination/antitermination protein NusA	transcription termination/antitermination protein NusA [Bacillus tequilensis]	0	RMVO01P000726
MUG00207.1	156	ribosome maturation factor RimP	ribosome maturation factor RimP [Bacillus tequilensis]	0	RMVO01P000727
MUG00208.1	1437	PolC-type DNA polymerase III	PolC-type DNA polymerase III [Bacillus tequilensis]	0	RMVO01P000728
MUG00209.1	564	proline--tRNA ligase	proline--tRNA ligase [Bacillus tequilensis]	0	RMVO01P000729
MUG00210.1	422	RIP metalloprotease RseP	RIP metalloprotease RseP [Bacillus tequilensis]	0	RMVO01P000730
MUG00211.1	383	1-deoxy-D-xylulose-5-phosphate reductoisomerase	1-deoxy-D-xylulose-5-phosphate reductoisomerase [Bacillus tequilensis]	0	RMVO01P000731
MUG00212.1	269	phosphatidate cytidylyltransferase	phosphatidate cytidylyltransferase [Bacillus tequilensis]	0	RMVO01P000732
MUG00213.1	260	isoprenyl transferase	isoprenyl transferase [Bacillus tequilensis]	0	RMVO01P000733
MUG00214.1	185	ribosome recycling factor	ribosome recycling factor [Bacillus tequilensis]	0	RMVO01P000734
MUG00215.1	240	UMP kinase	UMP kinase [Bacillus tequilensis]	0	RMVO01P000735
MUG00216.1	293	elongation factor Ts	elongation factor Ts [Bacillus tequilensis]	0	RMVO01P000736
MUG00217.1	246	30S ribosomal protein S2	30S ribosomal protein S2 [Bacillus tequilensis]	0	RMVO01P000737
MUG00218.1	167	swarming motility protein SwrB	swarming motility protein SwrB [Bacillus tequilensis]	0	RMVO01P000738
MUG00219.1	254	FliA/WhiG family RNA polymerase sigma factor	FliA/WhiG family RNA polymerase sigma factor [Bacillus tequilensis]	0	RMVO01P000739
MUG00220.1	166	chemoreceptor glutamine deamidase CheD	chemoreceptor glutamine deamidase CheD [Bacillus tequilensis]	0	RMVO01P000740
MUG00221.1	209	chemotaxis protein CheC	chemotaxis protein CheC [Bacillus tequilensis]	0	RMVO01P000741
MUG00222.1	156	chemotaxis protein CheW	chemotaxis protein CheW [Bacillus tequilensis]	0	RMVO01P000742
MUG00223.1	672	chemotaxis protein CheA	chemotaxis protein CheA [Bacillus tequilensis]	0	RMVO01P000743
MUG00224.1	357	chemotaxis response regulator protein-glutamate methylesterase	chemotaxis response regulator protein-glutamate methylesterase [Bacillus tequilensis]	0	RMVO01P000744
MUG00225.1	298	MinD/ParA family protein	MinD/ParA family protein [Bacillus tequilensis]	0	RMVO01P000745
MUG00226.1	366	flagellar biosynthesis protein FlhF	flagellar biosynthesis protein FlhF [Bacillus tequilensis]	0	RMVO01P000746
MUG00227.1	677	flagellar biosynthesis protein FlhA	flagellar biosynthesis protein FlhA [Bacillus tequilensis]	0	RMVO01P000747
MUG00228.1	360	flagellar biosynthesis protein FlhB	flagellar biosynthesis protein FlhB [Bacillus tequilensis]	0	RMVO01P000748
MUG00229.1	259	flagellar type III secretion system protein FliR	flagellar type III secretion system protein FliR [Bacillus tequilensis]	0	RMVO01P000749
MUG00230.1	89	flagellar biosynthesis protein FliQ	flagellar biosynthesis protein FliQ [Bacillus tequilensis]	0	RMVO01P000750
MUG00231.1	221	flagellar type III secretion system pore protein FliP	flagellar type III secretion system pore protein FliP [Bacillus tequilensis]	0	RMVO01P000751
MUG00232.1	219	flagella biosynthesis regulatory protein FliZ	flagella biosynthesis regulatory protein FliZ [Bacillus tequilensis]	0	RMVO01P000752
MUG00233.1	120	response regulator	response regulator [Bacillus tequilensis]	0	RMVO01P000753
MUG00234.1	378	flagellar motor switch phosphatase FliY	flagellar motor switch phosphatase FliY [Bacillus tequilensis]	0	RMVO01P000754
MUG00235.1	332	flagellar motor switch protein FliM	flagellar motor switch protein FliM [Bacillus tequilensis]	0	RMVO01P000755
MUG00236.1	140	flagellar basal body-associated protein FliL	flagellar basal body-associated protein FliL [Bacillus tequilensis]	0	RMVO01P000756
MUG00237.1	71	hypothetical protein	hypothetical protein ECC01_04080 [Bacillus tequilensis]	0	RMVO01P000757
MUG00238.1	264	flagellar basal body rod protein FlgG	flagellar basal body rod protein FlgG [Bacillus tequilensis]	0	RMVO01P000758
MUG00239.1	140	flagellar hook assembly protein FlgD	flagellar hook assembly protein FlgD [Bacillus tequilensis]	0	RMVO01P000759
MUG00240.1	487	flagellar hook-length control protein FliK	flagellar hook-length control protein FliK [Bacillus tequilensis]	0	RMVO01P000760
MUG00241.1	204	hypothetical protein	hypothetical protein ECC01_04100 [Bacillus tequilensis]	0	RMVO01P000761
MUG00242.1	147	flagellar biosynthesis chaperone FliJ	flagellar biosynthesis chaperone FliJ [Bacillus tequilensis]	0	RMVO01P000762
MUG00243.1	438	flagellar protein export ATPase FliI	flagellar protein export ATPase FliI [Bacillus tequilensis]	0	RMVO01P000763
MUG00244.1	253	flagellar assembly protein FliH	flagellar assembly protein FliH [Bacillus tequilensis]	0	RMVO01P000764
MUG00245.1	338	flagellar motor switch protein FliG	flagellar motor switch protein FliG [Bacillus tequilensis]	0	RMVO01P000765
MUG00246.1	536	flagellar basal body M-ring protein FliF	flagellar basal body M-ring protein FliF [Bacillus tequilensis]	0	RMVO01P000766
MUG00247.1	106	flagellar hook-basal body complex protein FliE	flagellar hook-basal body complex protein FliE [Bacillus tequilensis]	0	RMVO01P000767
MUG00248.1	150	flagellar basal body rod protein FlgC	flagellar basal body rod protein FlgC [Bacillus tequilensis]	0	RMVO01P000768
MUG00249.1	129	flagellar basal body rod protein FlgB	flagellar basal body rod protein FlgB [Bacillus tequilensis]	0	RMVO01P000769
MUG00250.1	259	GTP-sensing pleiotropic transcriptional regulator CodY	GTP-sensing pleiotropic transcriptional regulator CodY [Bacillus tequilensis]	0	RMVO01P000770
MUG00251.1	467	HslU--HslV peptidase ATPase subunit	HslU--HslV peptidase ATPase subunit [Bacillus tequilensis]	0	RMVO01P000771
MUG00252.1	181	ATP-dependent protease subunit HslV	ATP-dependent protease subunit HslV [Bacillus tequilensis]	0	RMVO01P000772
MUG00253.1	304	tyrosine recombinase XerC	tyrosine recombinase XerC [Bacillus tequilensis]	0	RMVO01P000773
MUG00254.1	435	FADH(2)-oxidizing methylenetetrahydrofolate--tRNA-(uracil(54)-C(5))-methyltransferase TrmFO	FADH(2)-oxidizing methylenetetrahydrofolate--tRNA-(uracil(54)-C(5))-methyltransferase TrmFO [Bacillus tequilensis]	0	RMVO01P000774
MUG00255.1	691	DNA topoisomerase 1	DNA topoisomerase 1 [Bacillus tequilensis]	0	RMVO01P000775
MUG00256.1	297	DNA-protecting protein DprA	DNA-protecting protein DprA [Bacillus tequilensis]	0	RMVO01P000776
MUG00257.1	300	succinate--CoA ligase subunit alpha	succinate--CoA ligase subunit alpha [Bacillus tequilensis]	0	RMVO01P000777
MUG00258.1	385	ADP-forming succinate--CoA ligase subunit beta	ADP-forming succinate--CoA ligase subunit beta [Bacillus tequilensis]	0	RMVO01P000778
MUG00259.1	93	FlhB-like flagellar biosynthesis protein	FlhB-like flagellar biosynthesis protein [Bacillus tequilensis]	0	RMVO01P000779
MUG00260.1	576	hypothetical protein	hypothetical protein ECC01_04195 [Bacillus tequilensis]	0	RMVO01P000780
MUG00261.1	255	ribonuclease HII	ribonuclease HII [Bacillus tequilensis]	0	RMVO01P000781
MUG00262.1	282	ribosome biogenesis GTPase YlqF	ribosome biogenesis GTPase YlqF [Bacillus tequilensis]	0	RMVO01P000782
MUG00263.1	115	50S ribosomal protein L19	50S ribosomal protein L19 [Bacillus tequilensis]	0	RMVO01P000783
MUG00264.1	243	tRNA (guanosine(37)-N1)-methyltransferase TrmD	tRNA (guanosine(37)-N1)-methyltransferase TrmD [Bacillus tequilensis]	0	RMVO01P000784
MUG00265.1	174	ribosome maturation factor RimM	ribosome maturation factor RimM [Bacillus tequilensis]	0	RMVO01P000785
MUG00266.1	128	hypothetical protein	hypothetical protein ECC01_04225 [Bacillus tequilensis]	0	RMVO01P000786
MUG00267.1	81	KH domain-containing protein	KH domain-containing protein [Bacillus tequilensis]	0	RMVO01P000787
MUG00268.1	90	30S ribosomal protein S16	30S ribosomal protein S16 [Bacillus tequilensis]	0	RMVO01P000788
MUG00269.1	446	signal recognition particle protein	signal recognition particle protein [Bacillus tequilensis]	0	RMVO01P000789
MUG00270.1	110	putative DNA-binding protein	putative DNA-binding protein [Bacillus tequilensis]	0	RMVO01P000790
MUG00271.1	161	hypothetical protein	hypothetical protein ECC01_04250 [Bacillus tequilensis]	0	RMVO01P000791
MUG00272.1	329	signal recognition particle-docking protein FtsY	signal recognition particle-docking protein FtsY [Bacillus tequilensis]	0	RMVO01P000792
MUG00273.1	1186	chromosome segregation protein SMC	chromosome segregation protein SMC [Bacillus tequilensis]	0	RMVO01P000793
MUG00274.1	249	ribonuclease III	ribonuclease III [Bacillus tequilensis]	0	RMVO01P000794
MUG00275.1	77	acyl carrier protein	acyl carrier protein [Bacillus tequilensis]	0	RMVO01P000795
MUG00276.1	246	3-oxoacyl-[acyl-carrier-protein] reductase	3-oxoacyl-[acyl-carrier-protein] reductase [Bacillus tequilensis]	0	RMVO01P000796
MUG00277.1	317	ACP S-malonyltransferase	ACP S-malonyltransferase [Bacillus tequilensis]	0	RMVO01P000797
MUG00278.1	333	phosphate acyltransferase PlsX	phosphate acyltransferase PlsX [Bacillus tequilensis]	0	RMVO01P000798
MUG00279.1	188	transcription factor FapR	transcription factor FapR [Bacillus tequilensis]	0	RMVO01P000799
MUG00280.1	682	ATP-dependent DNA helicase RecG	ATP-dependent DNA helicase RecG [Bacillus tequilensis]	0	RMVO01P000800
MUG00281.1	300	L-serine ammonia-lyase, iron-sulfur-dependent, subunit alpha	L-serine ammonia-lyase, iron-sulfur-dependent, subunit alpha [Bacillus tequilensis]	0	RMVO01P000801
MUG00282.1	220	L-serine ammonia-lyase, iron-sulfur-dependent, subunit beta	L-serine ammonia-lyase, iron-sulfur-dependent, subunit beta [Bacillus tequilensis]	0	RMVO01P000802
MUG00283.1	553	DAK2 domain-containing protein	DAK2 domain-containing protein [Bacillus tequilensis]	0	RMVO01P000803
MUG00284.1	120	Asp23/Gls24 family envelope stress response protein	Asp23/Gls24 family envelope stress response protein [Bacillus tequilensis]	0	RMVO01P000804
MUG00285.1	62	50S ribosomal protein L28	50S ribosomal protein L28 [Bacillus tequilensis]	0	RMVO01P000805
MUG00287.1	214	thiamine diphosphokinase	thiamine diphosphokinase [Bacillus tequilensis]	0	RMVO01P000806
MUG00288.1	217	ribulose-phosphate 3-epimerase	ribulose-phosphate 3-epimerase [Bacillus tequilensis]	0	RMVO01P000807
MUG00289.1	298	ribosome small subunit-dependent GTPase A	ribosome small subunit-dependent GTPase A [Bacillus tequilensis]	0	RMVO01P000808
MUG00290.1	648	Stk1 family PASTA domain-containing Ser/Thr kinase	Stk1 family PASTA domain-containing Ser/Thr kinase [Bacillus tequilensis]	0	RMVO01P000809
MUG00291.1	254	Stp1/IreP family PP2C-type Ser/Thr phosphatase	Stp1/IreP family PP2C-type Ser/Thr phosphatase [Bacillus tequilensis]	0	RMVO01P000810
MUG00292.1	363	23S rRNA (adenine(2503)-C(2))-methyltransferase RlmN	23S rRNA (adenine(2503)-C(2))-methyltransferase RlmN [Bacillus tequilensis]	0	RMVO01P000811
MUG00293.1	447	16S rRNA (cytosine(967)-C(5))-methyltransferase RsmB	16S rRNA (cytosine(967)-C(5))-methyltransferase RsmB [Bacillus tequilensis]	0	RMVO01P000812
MUG00294.1	317	methionyl-tRNA formyltransferase	methionyl-tRNA formyltransferase [Bacillus tequilensis]	0	RMVO01P000813
MUG00295.1	165	peptide deformylase	peptide deformylase [Bacillus tequilensis]	0	RMVO01P000814
MUG00296.1	805	primosomal protein N'	primosomal protein N' [Bacillus tequilensis]	0	RMVO01P000815
MUG00297.1	406	bifunctional phosphopantothenoylcysteine decarboxylase/phosphopantothenate--cysteine ligase CoaBC	bifunctional phosphopantothenoylcysteine decarboxylase/phosphopantothenate--cysteine ligase CoaBC [Bacillus tequilensis]	0	RMVO01P000816
MUG00298.1	67	DNA-directed RNA polymerase subunit omega	DNA-directed RNA polymerase subunit omega [Bacillus tequilensis]	0	RMVO01P000817
MUG00299.1	204	guanylate kinase	guanylate kinase [Bacillus tequilensis]	0	RMVO01P000818
MUG00300.1	89	DUF370 domain-containing protein	DUF370 domain-containing protein [Bacillus tequilensis]	0	RMVO01P000819
MUG00301.1	291	YicC family protein	YicC family protein [Bacillus tequilensis]	0	RMVO01P000820
MUG00302.1	890	calcium-translocating P-type ATPase, SERCA-type	calcium-translocating P-type ATPase, SERCA-type [Bacillus tequilensis]	0	RMVO01P000821
MUG00303.1	572	fibronectin/fibrinogen-binding protein	fibronectin/fibrinogen-binding protein [Bacillus tequilensis]	0	RMVO01P000822
MUG00304.1	162	bifunctional precorrin-2 dehydrogenase/sirohydrochlorin ferrochelatase	bifunctional precorrin-2 dehydrogenase/sirohydrochlorin ferrochelatase [Bacillus tequilensis]	0	RMVO01P000823
MUG00305.1	261	sirohydrochlorin chelatase	sirohydrochlorin chelatase [Bacillus tequilensis]	0	RMVO01P000824
MUG00306.1	257	uroporphyrinogen-III C-methyltransferase	uroporphyrinogen-III C-methyltransferase [Bacillus tequilensis]	0	RMVO01P000825
MUG00307.1	197	adenylyl-sulfate kinase	adenylyl-sulfate kinase [Bacillus tequilensis]	0	RMVO01P000826
MUG00308.1	382	sulfate adenylyltransferase	sulfate adenylyltransferase [Bacillus tequilensis]	0	RMVO01P000827
MUG00309.1	354	inorganic phosphate transporter	inorganic phosphate transporter [Bacillus tequilensis]	0	RMVO01P000828
MUG00310.1	233	phosphoadenylyl-sulfate reductase	phosphoadenylyl-sulfate reductase [Bacillus tequilensis]	0	RMVO01P000829
MUG00311.1	216	orotate phosphoribosyltransferase	orotate phosphoribosyltransferase [Bacillus tequilensis]	0	RMVO01P000830
MUG00312.1	239	orotidine-5'-phosphate decarboxylase	orotidine-5'-phosphate decarboxylase [Bacillus tequilensis]	0	RMVO01P000831
MUG00313.1	311	dihydroorotate dehydrogenase	dihydroorotate dehydrogenase [Bacillus tequilensis]	0	RMVO01P000832
MUG00314.1	256	dihydroorotate oxidase B electron transfer subunit	dihydroorotate oxidase B electron transfer subunit [Bacillus tequilensis]	0	RMVO01P000833
MUG00315.1	1071	carbamoyl-phosphate synthase (glutamine-hydrolyzing) large subunit	carbamoyl-phosphate synthase (glutamine-hydrolyzing) large subunit [Bacillus tequilensis]	0	RMVO01P000834
MUG00316.1	364	glutamine-hydrolyzing carbamoyl-phosphate synthase small subunit	glutamine-hydrolyzing carbamoyl-phosphate synthase small subunit [Bacillus tequilensis]	0	RMVO01P000835
MUG00317.1	428	dihydroorotase	dihydroorotase [Bacillus tequilensis]	0	RMVO01P000836
MUG00318.1	304	aspartate carbamoyltransferase catalytic subunit	aspartate carbamoyltransferase catalytic subunit [Bacillus tequilensis]	0	RMVO01P000837
MUG00319.1	434	uracil permease	uracil permease [Bacillus tequilensis]	0	RMVO01P000838
MUG00320.1	181	bifunctional pyrimidine operon transcriptional regulator/uracil phosphoribosyltransferase	bifunctional pyrimidine operon transcriptional regulator/uracil phosphoribosyltransferase [Bacillus tequilensis]	0	RMVO01P000839
MUG00321.1	303	RluA family pseudouridine synthase	RluA family pseudouridine synthase [Bacillus tequilensis]	0	RMVO01P000840
MUG00322.1	154	lipoprotein signal peptidase	lipoprotein signal peptidase [Bacillus tequilensis]	0	RMVO01P000841
MUG00323.1	124	TraR/DksA family transcriptional regulator	TraR/DksA family transcriptional regulator [Bacillus tequilensis]	0	RMVO01P000842
MUG00324.1	921	isoleucine--tRNA ligase	isoleucine--tRNA ligase [Bacillus tequilensis]	0	RMVO01P000843
MUG00325.1	164	septum site-determining protein DivIVA	septum site-determining protein DivIVA [Bacillus tequilensis]	0	RMVO01P000844
MUG00326.1	257	RNA-binding protein	RNA-binding protein [Bacillus tequilensis]	0	RMVO01P000845
MUG00327.1	90	YggT family protein	YggT family protein [Bacillus tequilensis]	0	RMVO01P000846
MUG00328.1	151	cell division protein SepF	cell division protein SepF [Bacillus tequilensis]	0	RMVO01P000847
MUG00329.1	230	YggS family pyridoxal phosphate-dependent enzyme	YggS family pyridoxal phosphate-dependent enzyme [Bacillus tequilensis]	0	RMVO01P000848
MUG00330.1	278	peptidoglycan editing factor PgeF	peptidoglycan editing factor PgeF [Bacillus tequilensis]	0	RMVO01P000849
MUG00331.1	81	YlmC/YmxH family sporulation protein	YlmC/YmxH family sporulation protein [Bacillus tequilensis]	0	RMVO01P000850
MUG00332.1	426	acetylornithine deacetylase	acetylornithine deacetylase [Bacillus tequilensis]	0	RMVO01P000851
MUG00333.1	264	ABC transporter ATP-binding protein	ABC transporter ATP-binding protein [Bacillus tequilensis]	0	RMVO01P000852
MUG00334.1	260	RNA polymerase sporulation sigma factor SigG	RNA polymerase sporulation sigma factor SigG [Bacillus tequilensis]	0	RMVO01P000853
MUG00335.1	239	RNA polymerase sporulation sigma factor SigE	RNA polymerase sporulation sigma factor SigE [Bacillus tequilensis]	0	RMVO01P000854
MUG00337.1	1433	bacillopeptidase F	bacillopeptidase F [Bacillus tequilensis]	0	RMVO01P000855
MUG00338.1	382	cell division protein FtsZ	cell division protein FtsZ [Bacillus tequilensis]	0	RMVO01P000856
MUG00339.1	440	cell division protein FtsA	cell division protein FtsA [Bacillus tequilensis]	0	RMVO01P000857
MUG00340.1	121	DUF1290 domain-containing protein	DUF1290 domain-containing protein [Bacillus tequilensis]	0	RMVO01P000858
MUG00341.1	235	DUF881 domain-containing protein	DUF881 domain-containing protein [Bacillus tequilensis]	0	RMVO01P000859
MUG00342.1	231	DUF881 domain-containing protein	DUF881 domain-containing protein [Bacillus tequilensis]	0	RMVO01P000860
MUG00343.1	263	cell division protein DivIB	cell division protein DivIB [Bacillus tequilensis]	0	RMVO01P000861
MUG00344.1	303	UDP-N-acetylmuramate dehydrogenase	UDP-N-acetylmuramate dehydrogenase [Bacillus tequilensis]	0	RMVO01P000862
MUG00345.1	363	undecaprenyldiphospho-muramoylpentapeptide beta-N-acetylglucosaminyltransferase	undecaprenyldiphospho-muramoylpentapeptide beta-N-acetylglucosaminyltransferase [Bacillus tequilensis]	0	RMVO01P000863
MUG00346.1	366	stage V sporulation protein E	stage V sporulation protein E [Bacillus tequilensis]	0	RMVO01P000864
MUG00347.1	451	UDP-N-acetylmuramoyl-L-alanine--D-glutamate ligase	UDP-N-acetylmuramoyl-L-alanine--D-glutamate ligase [Bacillus tequilensis]	0	RMVO01P000865
MUG00348.1	324	phospho-N-acetylmuramoyl-pentapeptide-transferase	phospho-N-acetylmuramoyl-pentapeptide-transferase [Bacillus tequilensis]	0	RMVO01P000866
MUG00349.1	494	UDP-N-acetylmuramoyl-L-alanyl-D-glutamate--2,6-diaminopimelate ligase	UDP-N-acetylmuramoyl-L-alanyl-D-glutamate--2,6-diaminopimelate ligase [Bacillus tequilensis]	0	RMVO01P000867
MUG00350.1	646	stage V sporulation protein D	stage V sporulation protein D [Bacillus tequilensis]	0	RMVO01P000868
MUG00351.1	716	penicillin-binding protein	penicillin-binding protein [Bacillus tequilensis]	0	RMVO01P000869
MUG00352.1	117	cell division protein FtsL	cell division protein FtsL [Bacillus tequilensis]	0	RMVO01P000870
MUG00353.1	311	16S rRNA (cytosine(1402)-N(4))-methyltransferase RsmH	16S rRNA (cytosine(1402)-N(4))-methyltransferase RsmH [Bacillus tequilensis]	0	RMVO01P000871
MUG00355.1	539	bacillithiol biosynthesis cysteine-adding enzyme BshC	bacillithiol biosynthesis cysteine-adding enzyme BshC [Bacillus tequilensis]	0	RMVO01P000872
MUG00356.1	298	2-dehydropantoate 2-reductase	2-dehydropantoate 2-reductase [Bacillus tequilensis]	0	RMVO01P000873
MUG00357.1	160	N-acetyltransferase	N-acetyltransferase [Bacillus tequilensis]	0	RMVO01P000874
MUG00358.1	193	RsfA family transcriptional regulator	RsfA family transcriptional regulator [Bacillus tequilensis]	0	RMVO01P000875
MUG00359.1	59	50S ribosomal protein L32	50S ribosomal protein L32 [Bacillus tequilensis]	0	RMVO01P000876
MUG00360.1	172	DUF177 domain-containing protein	DUF177 domain-containing protein [Bacillus tequilensis]	0	RMVO01P000877
MUG00361.1	61	hypothetical protein	hypothetical protein ECC01_04700 [Bacillus tequilensis]	0	RMVO01P000878
MUG00362.1	415	nucleotidyltransferase	nucleotidyltransferase [Bacillus tequilensis]	0	RMVO01P000879
MUG00363.1	341	PDZ domain-containing protein	PDZ domain-containing protein [Bacillus tequilensis]	0	RMVO01P000880
MUG00364.1	260	patatin family protein	patatin family protein [Bacillus tequilensis]	0	RMVO01P000881
MUG00365.1	408	sporulation integral membrane protein YlbJ	sporulation integral membrane protein YlbJ [Bacillus tequilensis]	0	RMVO01P000882
MUG00366.1	161	pantetheine-phosphate adenylyltransferase	pantetheine-phosphate adenylyltransferase [Bacillus tequilensis]	0	RMVO01P000883
MUG00367.1	184	16S rRNA (guanine(966)-N(2))-methyltransferase RsmD	16S rRNA (guanine(966)-N(2))-methyltransferase RsmD [Bacillus tequilensis]	0	RMVO01P000884
MUG00368.1	90	DUF2129 domain-containing protein	DUF2129 domain-containing protein [Bacillus tequilensis]	0	RMVO01P000885
MUG00369.1	149	YlbF family regulator	YlbF family regulator [Bacillus tequilensis]	0	RMVO01P000886
MUG00370.1	79	hypothetical protein	hypothetical protein ECC01_04745 [Bacillus tequilensis]	0	RMVO01P000887
MUG00371.1	132	hypothetical protein	hypothetical protein ECC01_04750 [Bacillus tequilensis]	0	RMVO01P000888
MUG00372.1	346	hypothetical protein	hypothetical protein ECC01_04755 [Bacillus tequilensis]	0	RMVO01P000889
MUG00373.1	148	CBS domain-containing protein	CBS domain-containing protein [Bacillus tequilensis]	0	RMVO01P000890
MUG00374.1	120	hypothetical protein	hypothetical protein ECC01_04765 [Bacillus tequilensis]	0	RMVO01P000891
MUG00375.1	297	cytochrome c oxidase assembly factor CtaG	cytochrome c oxidase assembly factor CtaG [Bacillus tequilensis]	0	RMVO01P000892
MUG00376.1	110	cytochrome c oxidase subunit IVB	cytochrome c oxidase subunit IVB [Bacillus tequilensis]	0	RMVO01P000893
MUG00377.1	207	cytochrome (ubi)quinol oxidase subunit III	cytochrome (ubi)quinol oxidase subunit III [Bacillus tequilensis]	0	RMVO01P000894
MUG00378.1	622	cytochrome c oxidase subunit I	cytochrome c oxidase subunit I [Bacillus tequilensis]	0	RMVO01P000895
MUG00379.1	356	cytochrome c oxidase subunit II	cytochrome c oxidase subunit II [Bacillus tequilensis]	0	RMVO01P000896
MUG00380.1	305	protoheme IX farnesyltransferase	protoheme IX farnesyltransferase [Bacillus tequilensis]	0	RMVO01P000897
MUG00381.1	306	heme A synthase CtaA	heme A synthase CtaA [Bacillus tequilensis]	0	RMVO01P000898
MUG00382.1	1148	pyruvate carboxylase	pyruvate carboxylase [Bacillus tequilensis]	0	RMVO01P000899
MUG00383.1	403	FtsW/RodA/SpoVE family cell cycle protein	FtsW/RodA/SpoVE family cell cycle protein [Bacillus tequilensis]	0	RMVO01P000900
MUG00384.1	93	DUF1507 family protein	DUF1507 family protein [Bacillus tequilensis]	0	RMVO01P000901
MUG00385.1	309	glutaminase A	glutaminase A [Bacillus tequilensis]	0	RMVO01P000902
MUG00386.1	161	peptidyl-prolyl cis-trans isomerase	peptidyl-prolyl cis-trans isomerase [Bacillus tequilensis]	0	RMVO01P000903
MUG00387.1	442	PhoH family protein	PhoH family protein [Bacillus tequilensis]	0	RMVO01P000904
MUG00388.1	209	YhcN/YlaJ family sporulation lipoprotein	YhcN/YlaJ family sporulation lipoprotein [Bacillus tequilensis]	0	RMVO01P000905
MUG00389.1	69	DUF2197 domain-containing protein	DUF2197 domain-containing protein [Bacillus tequilensis]	0	RMVO01P000906
MUG00390.1	105	hypothetical protein	hypothetical protein ECC01_04845 [Bacillus tequilensis]	0	RMVO01P000907
MUG00391.1	612	translational GTPase TypA	translational GTPase TypA [Bacillus tequilensis]	0	RMVO01P000908
MUG00392.1	62	hypothetical protein	hypothetical protein ECC01_04855 [Bacillus tequilensis]	0	RMVO01P000909
MUG00393.1	203	hypothetical protein	hypothetical protein ECC01_04860 [Bacillus tequilensis]	0	RMVO01P000910
MUG00394.1	97	anti-sigma-YlaC factor YlaD	anti-sigma-YlaC factor YlaD [Bacillus tequilensis]	0	RMVO01P000911
MUG00395.1	89	hypothetical protein	hypothetical protein ECC01_04875 [Bacillus tequilensis]	0	RMVO01P000912
MUG00396.1	646	hypothetical protein	hypothetical protein ECC01_04880 [Bacillus tequilensis]	0	RMVO01P000913
MUG00397.1	521	peptidase M4 family protein	peptidase M4 family protein [Bacillus tequilensis]	0	RMVO01P000914
MUG00398.1	144	Rrf2 family transcriptional regulator	Rrf2 family transcriptional regulator [Bacillus tequilensis]	0	RMVO01P000915
MUG00399.1	300	alpha/beta hydrolase	alpha/beta hydrolase [Bacillus tequilensis]	0	RMVO01P000916
MUG00400.1	304	class I SAM-dependent methyltransferase	class I SAM-dependent methyltransferase [Bacillus tequilensis]	0	RMVO01P000917
MUG00402.1	265	inositol monophosphatase family protein	inositol monophosphatase family protein [Bacillus tequilensis]	0	RMVO01P000918
MUG00403.1	62	hypothetical protein	hypothetical protein ECC01_04915 [Bacillus tequilensis]	0	RMVO01P000919
MUG00404.1	212	DUF1054 family protein	DUF1054 family protein [Bacillus tequilensis]	0	RMVO01P000920
MUG00405.1	88	UPF0223 family protein	UPF0223 family protein [Bacillus tequilensis]	0	RMVO01P000921
MUG00406.1	490	aminotransferase class I/II-fold pyridoxal phosphate-dependent enzyme	aminotransferase class I/II-fold pyridoxal phosphate-dependent enzyme [Bacillus tequilensis]	0	RMVO01P000922
MUG00407.1	39	GapA-binding peptide SR1P	GapA-binding peptide SR1P [Bacillus tequilensis]	0	RMVO01P000923
MUG00408.1	124	Pal-related lipoprotein	Pal-related lipoprotein [Bacillus tequilensis]	0	RMVO01P000924
MUG00409.1	470	dihydrolipoyl dehydrogenase	dihydrolipoyl dehydrogenase [Bacillus tequilensis]	0	RMVO01P000925
MUG00410.1	442	pyruvate dehydrogenase complex dihydrolipoyllysine-residue acetyltransferase	pyruvate dehydrogenase complex dihydrolipoyllysine-residue acetyltransferase [Bacillus tequilensis]	0	RMVO01P000926
MUG00411.1	325	alpha-ketoacid dehydrogenase subunit beta	alpha-ketoacid dehydrogenase subunit beta [Bacillus tequilensis]	0	RMVO01P000927
MUG00412.1	371	pyruvate dehydrogenase (acetyl-transferring) E1 component subunit alpha	pyruvate dehydrogenase (acetyl-transferring) E1 component subunit alpha [Bacillus tequilensis]	0	RMVO01P000928
MUG00413.1	223	hypothetical protein	hypothetical protein ECC01_04965 [Bacillus tequilensis]	0	RMVO01P000929
MUG00414.1	52	YjcZ family sporulation protein	YjcZ family sporulation protein [Bacillus tequilensis]	0	RMVO01P000930
MUG00415.1	184	peptide deformylase	peptide deformylase [Bacillus tequilensis]	0	RMVO01P000931
MUG00416.1	257	Cof-type HAD-IIB family hydrolase	Cof-type HAD-IIB family hydrolase [Bacillus tequilensis]	0	RMVO01P000932
MUG00417.1	69	DUF1447 family protein	DUF1447 family protein [Bacillus tequilensis]	0	RMVO01P000933
MUG00418.1	555	ribonuclease J	ribonuclease J [Bacillus tequilensis]	0	RMVO01P000934
MUG00419.1	577	adenine deaminase	adenine deaminase [Bacillus tequilensis]	0	RMVO01P000935
MUG00420.1	221	Ktr system potassium uptake protein C	Ktr system potassium uptake protein C [Bacillus tequilensis]	0	RMVO01P000936
MUG00421.1	275	gamma-glutamylcyclotransferase	gamma-glutamylcyclotransferase [Bacillus tequilensis]	0	RMVO01P000937
MUG00422.1	428	PAS domain-containing protein	PAS domain-containing protein [Bacillus tequilensis]	0	RMVO01P000938
MUG00423.1	92	AbrB/MazE/SpoVT family DNA-binding domain-containing protein	AbrB/MazE/SpoVT family DNA-binding domain-containing protein [Bacillus tequilensis]	0	RMVO01P000939
MUG00424.1	335	rod shape-determining protein	rod shape-determining protein [Bacillus tequilensis]	0	RMVO01P000940
MUG00425.1	44	hypothetical protein	hypothetical protein ECC01_05025 [Bacillus tequilensis]	0	RMVO01P000941
MUG00426.1	410	aminopeptidase	aminopeptidase [Bacillus tequilensis]	0	RMVO01P000942
MUG00427.1	303	ketopantoate reductase family protein	ketopantoate reductase family protein [Bacillus tequilensis]	0	RMVO01P000943
MUG00428.1	540	ATP-binding cassette domain-containing protein	ATP-binding cassette domain-containing protein [Bacillus tequilensis]	0	RMVO01P000944
MUG00429.1	89	hypothetical protein	hypothetical protein ECC01_05045 [Bacillus tequilensis]	0	RMVO01P000945
MUG00430.1	193	Signal peptidase I T	Signal peptidase I T [Bacillus tequilensis]	0	RMVO01P000946
MUG00431.1	635	PTS fructose transporter subunit IIA	PTS fructose transporter subunit IIA [Bacillus tequilensis]	0	RMVO01P000947
MUG00432.1	303	1-phosphofructokinase	1-phosphofructokinase [Bacillus tequilensis]	0	RMVO01P000948
MUG00433.1	251	DeoR/GlpR transcriptional regulator	DeoR/GlpR transcriptional regulator [Bacillus tequilensis]	0	RMVO01P000949
MUG00434.1	397	FtsX-like permease family protein	FtsX-like permease family protein [Bacillus tequilensis]	0	RMVO01P000950
MUG00435.1	230	ABC transporter ATP-binding protein	ABC transporter ATP-binding protein [Bacillus tequilensis]	0	RMVO01P000951
MUG00436.1	377	efflux RND transporter periplasmic adaptor subunit	efflux RND transporter periplasmic adaptor subunit [Bacillus tequilensis]	0	RMVO01P000952
MUG00437.1	231	YIP1 family protein	YIP1 family protein [Bacillus tequilensis]	0	RMVO01P000953
MUG00438.1	604	ABC transporter ATP-binding protein	ABC transporter ATP-binding protein [Bacillus tequilensis]	0	RMVO01P000954
MUG00439.1	585	ABC transporter ATP-binding protein	ABC transporter ATP-binding protein [Bacillus tequilensis]	0	RMVO01P000955
MUG00440.1	77	molybdopterin converting factor subunit 1	molybdopterin converting factor subunit 1 [Bacillus tequilensis]	0	RMVO01P000956
MUG00441.1	157	molybdenum cofactor biosynthesis protein MoaE	molybdenum cofactor biosynthesis protein MoaE [Bacillus tequilensis]	0	RMVO01P000957
MUG00442.1	173	molybdopterin-guanine dinucleotide biosynthesis protein B	molybdopterin-guanine dinucleotide biosynthesis protein B [Bacillus tequilensis]	0	RMVO01P000958
MUG00443.1	430	molybdopterin molybdotransferase MoeA	molybdopterin molybdotransferase MoeA [Bacillus tequilensis]	0	RMVO01P000959
MUG00444.1	339	molybdopterin-synthase adenylyltransferase MoeB	molybdopterin-synthase adenylyltransferase MoeB [Bacillus tequilensis]	0	RMVO01P000960
MUG00445.1	199	molybdenum cofactor guanylyltransferase	molybdenum cofactor guanylyltransferase [Bacillus tequilensis]	0	RMVO01P000961
MUG00446.1	321	sporulation protein	sporulation protein [Bacillus tequilensis]	0	RMVO01P000962
MUG00447.1	194	transcriptional regulator Rok	transcriptional regulator Rok [Bacillus tequilensis]	0	RMVO01P000963
MUG00448.1	148	TlpA family protein disulfide reductase	TlpA family protein disulfide reductase [Bacillus tequilensis]	0	RMVO01P000964
MUG00449.1	180	peroxiredoxin	peroxiredoxin [Bacillus tequilensis]	0	RMVO01P000965
MUG00450.1	267	mechanosensitive ion channel family protein	mechanosensitive ion channel family protein [Bacillus tequilensis]	0	RMVO01P000966
MUG00451.1	81	YkuS family protein	YkuS family protein [Bacillus tequilensis]	0	RMVO01P000967
MUG00452.1	374	N-acetyldiaminopimelate deacetylase	N-acetyldiaminopimelate deacetylase [Bacillus tequilensis]	0	RMVO01P000968
MUG00453.1	236	2,3,4,5-tetrahydropyridine-2,6-dicarboxylate N-acetyltransferase	2,3,4,5-tetrahydropyridine-2,6-dicarboxylate N-acetyltransferase [Bacillus tequilensis]	0	RMVO01P000969
MUG00454.1	151	flavodoxin	flavodoxin [Bacillus tequilensis]	0	RMVO01P000970
MUG00455.1	297	exo-alpha-sialidase	exo-alpha-sialidase [Bacillus tequilensis]	0	RMVO01P000971
MUG00456.1	158	flavodoxin	flavodoxin [Bacillus tequilensis]	0	RMVO01P000972
MUG00457.1	293	LysR family transcriptional regulator	LysR family transcriptional regulator [Bacillus tequilensis]	0	RMVO01P000973
MUG00458.1	147	CBS domain-containing protein	CBS domain-containing protein [Bacillus tequilensis]	0	RMVO01P000974
MUG00459.1	65	antirepressor AbbA	antirepressor AbbA [Bacillus tequilensis]	0	RMVO01P000975
MUG00460.1	172	hypothetical protein	hypothetical protein ECC01_05200 [Bacillus tequilensis]	0	RMVO01P000976
MUG00461.1	79	DUF1797 family protein	DUF1797 family protein [Bacillus tequilensis]	0	RMVO01P000977
MUG00462.1	407	EAL domain-containing protein	EAL domain-containing protein [Bacillus tequilensis]	0	RMVO01P000978
MUG00463.1	254	2,4-dienoyl-CoA reductase	2,4-dienoyl-CoA reductase [Bacillus tequilensis]	0	RMVO01P000979
MUG00464.1	286	metallophosphoesterase	metallophosphoesterase [Bacillus tequilensis]	0	RMVO01P000980
MUG00466.1	430	MFS transporter	MFS transporter [Bacillus tequilensis]	0	RMVO01P000981
MUG00467.1	154	hypothetical protein	hypothetical protein ECC01_05235 [Bacillus tequilensis]	0	RMVO01P000982
MUG00468.1	303	chemotaxis protein CheV	chemotaxis protein CheV [Bacillus tequilensis]	0	RMVO01P000983
MUG00469.1	53	hypothetical protein	hypothetical protein ECC01_05245 [Bacillus tequilensis]	0	RMVO01P000984
MUG00470.1	393	aminotransferase A	aminotransferase A [Bacillus tequilensis]	0	RMVO01P000985
MUG00471.1	606	PAS domain-containing protein	PAS domain-containing protein [Bacillus tequilensis]	0	RMVO01P000986
MUG00472.1	706	penicillin-binding protein 2	penicillin-binding protein 2 [Bacillus tequilensis]	0	RMVO01P000987
MUG00473.1	257	hypothetical protein	hypothetical protein ECC01_05265 [Bacillus tequilensis]	0	RMVO01P000988
MUG00474.1	296	Virginiamycin B lyase	Virginiamycin B lyase [Bacillus tequilensis]	0	RMVO01P000989
MUG00475.1	288	NAD(P)-dependent oxidoreductase	NAD(P)-dependent oxidoreductase [Bacillus tequilensis]	0	RMVO01P000990
MUG00476.1	655	methyl-accepting chemotaxis protein	methyl-accepting chemotaxis protein [Bacillus tequilensis]	0	RMVO01P000991
MUG00478.1	342	spore photoproduct lyase	spore photoproduct lyase [Bacillus tequilensis]	0	RMVO01P000992
MUG00479.1	79	transcriptional regulator	transcriptional regulator [Bacillus tequilensis]	0	RMVO01P000993
MUG00480.1	570	phosphoenolpyruvate--protein phosphotransferase	phosphoenolpyruvate--protein phosphotransferase [Bacillus tequilensis]	0	RMVO01P000994
MUG00481.1	88	phosphocarrier protein HPr	phosphocarrier protein HPr [Bacillus tequilensis]	0	RMVO01P000995
MUG00482.1	699	PTS glucose transporter subunit IICBA	PTS glucose transporter subunit IICBA [Bacillus tequilensis]	0	RMVO01P000996
MUG00483.1	288	ptsGHI operon transcription antiterminator GlcT	ptsGHI operon transcription antiterminator GlcT [Bacillus tequilensis]	0	RMVO01P000997
MUG00484.1	321	LacI family DNA-binding transcriptional regulator	LacI family DNA-binding transcriptional regulator [Bacillus tequilensis]	0	RMVO01P000998
MUG00485.1	364	aminopeptidase P family protein	aminopeptidase P family protein [Bacillus tequilensis]	0	RMVO01P000999
MUG00486.1	67	hypothetical protein	hypothetical protein ECC01_05330 [Bacillus tequilensis]	0	RMVO01P001000
MUG00487.1	637	cadmium-translocating P-type ATPase	cadmium-translocating P-type ATPase [Bacillus tequilensis]	0	RMVO01P001001
MUG00488.1	165	TlpA family protein disulfide reductase	TlpA family protein disulfide reductase [Bacillus tequilensis]	0	RMVO01P001002
MUG00489.1	445	polysaccharide biosynthesis protein	polysaccharide biosynthesis protein [Bacillus tequilensis]	0	RMVO01P001003
MUG00490.1	208	cell wall hydrolase	cell wall hydrolase [Bacillus tequilensis]	0	RMVO01P001004
MUG00492.1	61	DUF2187 domain-containing protein	DUF2187 domain-containing protein [Bacillus tequilensis]	0	RMVO01P001005
MUG00493.1	96	DUF3219 family protein	DUF3219 family protein [Bacillus tequilensis]	0	RMVO01P001006
MUG00494.1	311	glycosylase	glycosylase [Bacillus tequilensis]	0	RMVO01P001007
MUG00495.1	75	LysM peptidoglycan-binding domain-containing protein	LysM peptidoglycan-binding domain-containing protein [Bacillus tequilensis]	0	RMVO01P001008
MUG00496.1	399	LysM peptidoglycan-binding domain-containing protein	LysM peptidoglycan-binding domain-containing protein [Bacillus tequilensis]	0	RMVO01P001009
MUG00497.1	248	glucose 1-dehydrogenase	glucose 1-dehydrogenase [Bacillus tequilensis]	0	RMVO01P001010
MUG00498.1	118	winged helix-turn-helix transcriptional regulator	winged helix-turn-helix transcriptional regulator [Bacillus tequilensis]	0	RMVO01P001011
MUG00499.1	165	NADPH-dependent 7-cyano-7-deazaguanine reductase QueF	NADPH-dependent 7-cyano-7-deazaguanine reductase QueF [Bacillus tequilensis]	0	RMVO01P001012
MUG00500.1	243	7-carboxy-7-deazaguanine synthase QueE	7-carboxy-7-deazaguanine synthase QueE [Bacillus tequilensis]	0	RMVO01P001013
MUG00501.1	149	6-carboxytetrahydropterin synthase QueD	6-carboxytetrahydropterin synthase QueD [Bacillus tequilensis]	0	RMVO01P001014
MUG00502.1	219	7-cyano-7-deazaguanine synthase QueC	7-cyano-7-deazaguanine synthase QueC [Bacillus tequilensis]	0	RMVO01P001015
MUG00503.1	347	hypothetical protein	hypothetical protein ECC01_05415 [Bacillus tequilensis]	0	RMVO01P001016
MUG00504.1	699	AAA family ATPase	AAA family ATPase [Bacillus tequilensis]	0	RMVO01P001017
MUG00505.1	78	hypothetical protein	hypothetical protein ECC01_05425 [Bacillus tequilensis]	0	RMVO01P001018
MUG00506.1	270	flagellar motor stator protein MotA	flagellar motor stator protein MotA [Bacillus tequilensis]	0	RMVO01P001019
MUG00507.1	261	flagellar motor protein MotB	flagellar motor protein MotB [Bacillus tequilensis]	0	RMVO01P001020
MUG00508.1	145	MarR family transcriptional regulator	MarR family transcriptional regulator [Bacillus tequilensis]	0	RMVO01P001021
MUG00509.1	506	two-component sensor histidine kinase	two-component sensor histidine kinase [Bacillus tequilensis]	0	RMVO01P001022
MUG00510.1	143	hypothetical protein	hypothetical protein ECC01_05450 [Bacillus tequilensis]	0	RMVO01P001023
MUG00511.1	85	aspartyl-phosphate phosphatase Spo0E family protein	aspartyl-phosphate phosphatase Spo0E family protein [Bacillus tequilensis]	0	RMVO01P001024
MUG00512.1	106	DUF1232 domain-containing protein	DUF1232 domain-containing protein [Bacillus tequilensis]	0	RMVO01P001025
MUG00513.1	178	cupin domain-containing protein	cupin domain-containing protein [Bacillus tequilensis]	0	RMVO01P001026
MUG00514.1	209	methylthioribulose 1-phosphate dehydratase	methylthioribulose 1-phosphate dehydratase [Bacillus tequilensis]	0	RMVO01P001027
MUG00515.1	235	2-hydroxy-3-keto-5-methylthiopentenyl-1-phosphate phosphatase	2-hydroxy-3-keto-5-methylthiopentenyl-1-phosphate phosphatase [Bacillus tequilensis]	0	RMVO01P001028
MUG00516.1	405	2,3-diketo-5-methylthiopentyl-1-phosphate enolase	2,3-diketo-5-methylthiopentyl-1-phosphate enolase [Bacillus tequilensis]	0	RMVO01P001029
MUG00517.1	398	pyridoxal phosphate-dependent aminotransferase	pyridoxal phosphate-dependent aminotransferase [Bacillus tequilensis]	0	RMVO01P001030
MUG00518.1	259	carbon-nitrogen family hydrolase	carbon-nitrogen family hydrolase [Bacillus tequilensis]	0	RMVO01P001031
MUG00519.1	397	S-methyl-5-thioribose kinase	S-methyl-5-thioribose kinase [Bacillus tequilensis]	0	RMVO01P001032
MUG00520.1	353	S-methyl-5-thioribose-1-phosphate isomerase	S-methyl-5-thioribose-1-phosphate isomerase [Bacillus tequilensis]	0	RMVO01P001033
MUG00521.1	41	hypothetical protein	hypothetical protein ECC01_05505 [Bacillus tequilensis]	0	RMVO01P001034
MUG00522.1	165	methylated-DNA--[protein]-cysteine S-methyltransferase	methylated-DNA--[protein]-cysteine S-methyltransferase [Bacillus tequilensis]	0	RMVO01P001035
MUG00523.1	738	PAS domain S-box protein	PAS domain S-box protein [Bacillus tequilensis]	0	RMVO01P001036
MUG00524.1	340	acyltransferase family protein	acyltransferase family protein [Bacillus tequilensis]	0	RMVO01P001037
MUG00525.1	60	hypothetical protein	hypothetical protein ECC01_05525 [Bacillus tequilensis]	0	RMVO01P001038
MUG00526.1	51	hypothetical protein	hypothetical protein ECC01_05530 [Bacillus tequilensis]	0	RMVO01P001039
MUG00527.1	449	Ktr system potassium uptake protein D	Ktr system potassium uptake protein D [Bacillus tequilensis]	0	RMVO01P001040
MUG00528.1	298	protease HtpX	protease HtpX [Bacillus tequilensis]	0	RMVO01P001041
MUG00529.1	233	DUF1836 domain-containing protein	DUF1836 domain-containing protein [Bacillus tequilensis]	0	RMVO01P001042
MUG00530.1	64	alpha/beta-type small acid-soluble spore protein	alpha/beta-type small acid-soluble spore protein [Bacillus tequilensis]	0	RMVO01P001043
MUG00531.1	381	anti-sigma-I factor RsgI	anti-sigma-I factor RsgI [Bacillus tequilensis]	0	RMVO01P001044
MUG00532.1	251	RNA polymerase sigma factor SigI	RNA polymerase sigma factor SigI [Bacillus tequilensis]	0	RMVO01P001045
MUG00533.1	324	TerC family protein	TerC family protein [Bacillus tequilensis]	0	RMVO01P001046
MUG00534.1	221	DedA family protein	DedA family protein [Bacillus tequilensis]	0	RMVO01P001047
MUG00535.1	800	GGDEF and EAL domain-containing protein	GGDEF and EAL domain-containing protein [Bacillus tequilensis]	0	RMVO01P001048
MUG00536.1	311	Ku protein	Ku protein [Bacillus tequilensis]	0	RMVO01P001049
MUG00537.1	611	DNA ligase D	DNA ligase D [Bacillus tequilensis]	0	RMVO01P001050
MUG00538.1	337	glycosyltransferase family 2 protein	glycosyltransferase family 2 protein [Bacillus tequilensis]	0	RMVO01P001051
MUG00539.1	564	hypothetical protein	hypothetical protein ECC01_05595 [Bacillus tequilensis]	0	RMVO01P001052
MUG00540.1	270	metallophosphoesterase	metallophosphoesterase [Bacillus tequilensis]	0	RMVO01P001053
MUG00541.1	183	hypothetical protein	hypothetical protein ECC01_05605 [Bacillus tequilensis]	0	RMVO01P001054
MUG00542.1	373	glycosyltransferase	glycosyltransferase [Bacillus tequilensis]	0	RMVO01P001055
MUG00543.1	154	MarR family transcriptional regulator	MarR family transcriptional regulator [Bacillus tequilensis]	0	RMVO01P001056
MUG00544.1	60	stress response protein YkoL	stress response protein YkoL [Bacillus tequilensis]	0	RMVO01P001057
MUG00545.1	51	hypothetical protein	hypothetical protein ECC01_05625 [Bacillus tequilensis]	0	RMVO01P001058
MUG00546.1	110	MerR family transcriptional regulator	MerR family transcriptional regulator [Bacillus tequilensis]	0	RMVO01P001059
MUG00547.1	451	magnesium transporter	magnesium transporter [Bacillus tequilensis]	0	RMVO01P001060
MUG00548.1	59	hypothetical protein	hypothetical protein ECC01_05640 [Bacillus tequilensis]	0	RMVO01P001061
MUG00549.1	45	hypothetical protein	hypothetical protein ECC01_05645 [Bacillus tequilensis]	0	RMVO01P001062
MUG00550.1	170	hypothetical protein	hypothetical protein ECC01_05650 [Bacillus tequilensis]	0	RMVO01P001063
MUG00551.1	226	hypothetical protein	hypothetical protein ECC01_05655 [Bacillus tequilensis]	0	RMVO01P001064
MUG00552.1	454	HAMP domain-containing histidine kinase	HAMP domain-containing histidine kinase [Bacillus tequilensis]	0	RMVO01P001065
MUG00553.1	228	response regulator transcription factor	response regulator transcription factor [Bacillus tequilensis]	0	RMVO01P001066
MUG00554.1	200	thiamine-binding protein	thiamine-binding protein [Bacillus tequilensis]	0	RMVO01P001067
MUG00555.1	199	thiamine permease	thiamine permease [Bacillus tequilensis]	0	RMVO01P001068
MUG00556.1	547	energy-coupling factor ABC transporter ATP-binding protein	energy-coupling factor ABC transporter ATP-binding protein [Bacillus tequilensis]	0	RMVO01P001069
MUG00557.1	254	thiamine permease	thiamine permease [Bacillus tequilensis]	0	RMVO01P001070
MUG00558.1	277	RsbT co-antagonist protein RsbRB	RsbT co-antagonist protein RsbRB [Bacillus tequilensis]	0	RMVO01P001071
MUG00559.1	319	major intracellular serine protease	major intracellular serine protease [Bacillus tequilensis]	0	RMVO01P001072
MUG00560.1	762	5-methyltetrahydropteroyltriglutamate--homocysteine S-methyltransferase	5-methyltetrahydropteroyltriglutamate--homocysteine S-methyltransferase [Bacillus tequilensis]	0	RMVO01P001073
MUG00561.1	156	nucleoside deaminase	nucleoside deaminase [Bacillus tequilensis]	0	RMVO01P001074
MUG00562.1	136	organic hydroperoxide resistance protein	organic hydroperoxide resistance protein [Bacillus tequilensis]	0	RMVO01P001075
MUG00563.1	147	MarR family transcriptional regulator	MarR family transcriptional regulator [Bacillus tequilensis]	0	RMVO01P001076
MUG00564.1	141	organic hydroperoxide resistance protein	organic hydroperoxide resistance protein [Bacillus tequilensis]	0	RMVO01P001077
MUG00565.1	415	glutamate-5-semialdehyde dehydrogenase	glutamate-5-semialdehyde dehydrogenase [Bacillus tequilensis]	0	RMVO01P001078
MUG00566.1	365	glutamate 5-kinase	glutamate 5-kinase [Bacillus tequilensis]	0	RMVO01P001079
MUG00567.1	300	formyltetrahydrofolate deformylase	formyltetrahydrofolate deformylase [Bacillus tequilensis]	0	RMVO01P001080
MUG00568.1	105	multidrug efflux SMR transporter subunit YkkD	multidrug efflux SMR transporter subunit YkkD [Bacillus tequilensis]	0	RMVO01P001081
MUG00569.1	112	multidrug efflux SMR transporter subunit YkkC	multidrug efflux SMR transporter subunit YkkC [Bacillus tequilensis]	0	RMVO01P001082
MUG00570.1	172	GNAT family N-acetyltransferase	GNAT family N-acetyltransferase [Bacillus tequilensis]	0	RMVO01P001083
MUG00571.1	175	DinB family protein	DinB family protein [Bacillus tequilensis]	0	RMVO01P001084
MUG00572.1	243	DUF421 domain-containing protein	DUF421 domain-containing protein [Bacillus tequilensis]	0	RMVO01P001085
MUG00573.1	74	hypothetical protein	hypothetical protein ECC01_05770 [Bacillus tequilensis]	0	RMVO01P001086
MUG00574.1	399	NO-inducible flavohemoprotein	NO-inducible flavohemoprotein [Bacillus tequilensis]	0	RMVO01P001087
MUG00575.1	172	acyl-CoA thioesterase	acyl-CoA thioesterase [Bacillus tequilensis]	0	RMVO01P001088
MUG00576.1	286	hypothetical protein	hypothetical protein ECC01_05785 [Bacillus tequilensis]	0	RMVO01P001089
MUG00577.1	349	lactonase family protein	lactonase family protein [Bacillus tequilensis]	0	RMVO01P001090
MUG00578.1	329	ATP-binding cassette domain-containing protein	ATP-binding cassette domain-containing protein [Bacillus tequilensis]	0	RMVO01P001091
MUG00579.1	296	NlpC/P60 family protein	NlpC/P60 family protein [Bacillus tequilensis]	0	RMVO01P001092
MUG00580.1	366	dipeptide epimerase	dipeptide epimerase [Bacillus tequilensis]	0	RMVO01P001093
MUG00581.1	319	LD-carboxypeptidase	LD-carboxypeptidase [Bacillus tequilensis]	0	RMVO01P001094
MUG00583.1	335	ABC transporter ATP-binding protein	ABC transporter ATP-binding protein [Bacillus tequilensis]	0	RMVO01P001095
MUG00584.1	320	ABC transporter permease	ABC transporter permease [Bacillus tequilensis]	0	RMVO01P001096
MUG00585.1	308	ABC transporter permease	ABC transporter permease [Bacillus tequilensis]	0	RMVO01P001097
MUG00586.1	274	aminopeptidase	aminopeptidase [Bacillus tequilensis]	0	RMVO01P001098
MUG00587.1	272	pyrroline-5-carboxylate reductase	pyrroline-5-carboxylate reductase [Bacillus tequilensis]	0	RMVO01P001099
MUG00589.1	323	glycosyltransferase family 2 protein	glycosyltransferase family 2 protein [Bacillus tequilensis]	0	RMVO01P001100
MUG00590.1	722	glycosyltransferase family 39 protein	glycosyltransferase family 39 protein [Bacillus tequilensis]	0	RMVO01P001101
MUG00591.1	48	hypothetical protein	hypothetical protein ECC01_05860 [Bacillus tequilensis]	0	RMVO01P001102
MUG00592.1	316	ring-cleaving dioxygenase	ring-cleaving dioxygenase [Bacillus tequilensis]	0	RMVO01P001103
MUG00593.1	438	amino acid permease	amino acid permease [Bacillus tequilensis]	0	RMVO01P001104
MUG00594.1	205	DUF47 domain-containing protein	DUF47 domain-containing protein [Bacillus tequilensis]	0	RMVO01P001105
MUG00595.1	333	inorganic phosphate transporter	inorganic phosphate transporter [Bacillus tequilensis]	0	RMVO01P001106
MUG00596.1	248	type II toxin-antitoxin system SpoIISA family toxin	type II toxin-antitoxin system SpoIISA family toxin [Bacillus tequilensis]	0	RMVO01P001107
MUG00597.1	56	type II toxin-antitoxin system SpoIISB family antitoxin	type II toxin-antitoxin system SpoIISB family antitoxin [Bacillus tequilensis]	0	RMVO01P001108
MUG00598.1	45	hypothetical protein	hypothetical protein ECC01_05895 [Bacillus tequilensis]	0	RMVO01P001109
MUG00599.1	297	LysM peptidoglycan-binding domain-containing protein	LysM peptidoglycan-binding domain-containing protein [Bacillus tequilensis]	0	RMVO01P001110
MUG00600.1	87	phage holin	phage holin [Bacillus tequilensis]	0	RMVO01P001111
MUG00601.1	89	protein xhlA	protein xhlA [Bacillus tequilensis]	0	RMVO01P001112
MUG00602.1	279	phage-like element PBSX protein XepA	phage-like element PBSX protein XepA [Bacillus tequilensis]	0	RMVO01P001113
MUG00603.1	54	XkdX family protein	XkdX family protein [Bacillus tequilensis]	0	RMVO01P001114
MUG00604.1	109	phage portal protein	phage portal protein [Bacillus tequilensis]	0	RMVO01P001115
MUG00605.1	685	terminase	terminase [Bacillus tequilensis]	0	RMVO01P001116
MUG00606.1	90	hypothetical protein	hypothetical protein ECC01_05935 [Bacillus tequilensis]	0	RMVO01P001117
MUG00607.1	192	DUF2313 domain-containing protein	DUF2313 domain-containing protein [Bacillus tequilensis]	0	RMVO01P001118
MUG00608.1	348	baseplate J/gp47 family protein	baseplate J/gp47 family protein [Bacillus tequilensis]	0	RMVO01P001119
MUG00609.1	141	DUF2634 domain-containing protein	DUF2634 domain-containing protein [Bacillus tequilensis]	0	RMVO01P001120
MUG00610.1	88	DUF2577 domain-containing protein	DUF2577 domain-containing protein [Bacillus tequilensis]	0	RMVO01P001121
MUG00612.1	219	LysM peptidoglycan-binding domain-containing protein	LysM peptidoglycan-binding domain-containing protein [Bacillus tequilensis]	0	RMVO01P001122
MUG00613.1	1293	lytic transglycosylase	lytic transglycosylase [Bacillus tequilensis]	0	RMVO01P001123
MUG00614.1	49	hypothetical protein	hypothetical protein ECC01_05975 [Bacillus tequilensis]	0	RMVO01P001124
MUG00615.1	148	phage-like element PBSX protein XkdN	phage-like element PBSX protein XkdN [Bacillus tequilensis]	0	RMVO01P001125
MUG00616.1	147	phage-like element PBSX protein XkdM	phage-like element PBSX protein XkdM [Bacillus tequilensis]	0	RMVO01P001126
MUG00617.1	466	phage-like element PBSX protein XkdK	phage-like element PBSX protein XkdK [Bacillus tequilensis]	0	RMVO01P001127
MUG00618.1	72	hypothetical protein	hypothetical protein ECC01_05995 [Bacillus tequilensis]	0	RMVO01P001128
MUG00619.1	146	phage-like element PBSX protein XkdJ	phage-like element PBSX protein XkdJ [Bacillus tequilensis]	0	RMVO01P001129
MUG00620.1	161	HK97 gp10 family phage protein	HK97 gp10 family phage protein [Bacillus tequilensis]	0	RMVO01P001130
MUG00621.1	118	DUF3599 family protein	DUF3599 family protein [Bacillus tequilensis]	0	RMVO01P001131
MUG00622.1	127	DUF3199 family protein	DUF3199 family protein [Bacillus tequilensis]	0	RMVO01P001132
MUG00623.1	311	phage-like element PBSX protein XkdG	phage-like element PBSX protein XkdG [Bacillus tequilensis]	0	RMVO01P001133
MUG00624.1	275	phage-like element PBSX protein XkdF	phage-like element PBSX protein XkdF [Bacillus tequilensis]	0	RMVO01P001134
MUG00625.1	495	phage portal protein	phage portal protein [Bacillus tequilensis]	0	RMVO01P001135
MUG00626.1	433	PBSX family phage terminase large subunit	PBSX family phage terminase large subunit [Bacillus tequilensis]	0	RMVO01P001136
MUG00627.1	265	terminase	terminase [Bacillus tequilensis]	0	RMVO01P001137
MUG00628.1	169	sigma-70 family RNA polymerase sigma factor	sigma-70 family RNA polymerase sigma factor [Bacillus tequilensis]	0	RMVO01P001138
MUG00629.1	68	phage-like element PBSX protein XtrA	phage-like element PBSX protein XtrA [Bacillus tequilensis]	0	RMVO01P001139
MUG00630.1	116	phage-like element PBSX protein XkdD	phage-like element PBSX protein XkdD [Bacillus tequilensis]	0	RMVO01P001140
MUG00631.1	55	hypothetical protein	hypothetical protein ECC01_06060 [Bacillus tequilensis]	0	RMVO01P001141
MUG00632.1	266	ATP-binding protein	ATP-binding protein [Bacillus tequilensis]	0	RMVO01P001142
MUG00633.1	278	phage-like element PBSX protein XkdB	phage-like element PBSX protein XkdB [Bacillus tequilensis]	0	RMVO01P001143
MUG00634.1	59	hypothetical protein	hypothetical protein ECC01_06075 [Bacillus tequilensis]	0	RMVO01P001144
MUG00635.1	113	helix-turn-helix transcriptional regulator	helix-turn-helix transcriptional regulator [Bacillus tequilensis]	0	RMVO01P001145
MUG00636.1	198	ImmA/IrrE family metallo-endopeptidase	ImmA/IrrE family metallo-endopeptidase [Bacillus tequilensis]	0	RMVO01P001146
MUG00637.1	278	manganese catalase family protein	manganese catalase family protein [Bacillus tequilensis]	0	RMVO01P001147
MUG00638.1	200	hypothetical protein	hypothetical protein ECC01_06095 [Bacillus tequilensis]	0	RMVO01P001148
MUG00639.1	125	PH domain-containing protein	PH domain-containing protein [Bacillus tequilensis]	0	RMVO01P001149
MUG00640.1	317	LysM peptidoglycan-binding domain-containing protein	LysM peptidoglycan-binding domain-containing protein [Bacillus tequilensis]	0	RMVO01P001150
MUG00641.1	85	YciI family protein	YciI family protein [Bacillus tequilensis]	0	RMVO01P001151
MUG00642.1	44	phosphatase RapA inhibitor PhrA	phosphatase RapA inhibitor PhrA [Bacillus tequilensis]	0	RMVO01P001152
MUG00643.1	378	tetratricopeptide repeat protein	tetratricopeptide repeat protein [Bacillus tequilensis]	0	RMVO01P001153
MUG00644.1	423	ATP-dependent metallopeptidase FtsH/Yme1/Tma family protein	ATP-dependent metallopeptidase FtsH/Yme1/Tma family protein [Bacillus tequilensis]	0	RMVO01P001154
MUG00645.1	154	hypothetical protein	hypothetical protein ECC01_06130 [Bacillus tequilensis]	0	RMVO01P001155
MUG00646.1	254	sulfite exporter TauE/SafE family protein	sulfite exporter TauE/SafE family protein [Bacillus tequilensis]	0	RMVO01P001156
MUG00647.1	497	altronate dehydratase	altronate dehydratase [Bacillus tequilensis]	0	RMVO01P001157
MUG00648.1	480	tagaturonate reductase	tagaturonate reductase [Bacillus tequilensis]	0	RMVO01P001158
MUG00649.1	333	LacI family transcriptional regulator	LacI family transcriptional regulator [Bacillus tequilensis]	0	RMVO01P001159
MUG00650.1	422	MFS transporter	MFS transporter [Bacillus tequilensis]	0	RMVO01P001160
MUG00651.1	278	SDR family NAD(P)-dependent oxidoreductase	SDR family NAD(P)-dependent oxidoreductase [Bacillus tequilensis]	0	RMVO01P001161
MUG00652.1	359	mannonate dehydratase	mannonate dehydratase [Bacillus tequilensis]	0	RMVO01P001162
MUG00653.1	339	zinc-binding alcohol dehydrogenase family protein	zinc-binding alcohol dehydrogenase family protein [Bacillus tequilensis]	0	RMVO01P001163
MUG00654.1	459	MFS transporter	MFS transporter [Bacillus tequilensis]	0	RMVO01P001164
MUG00655.1	473	glucuronate isomerase	glucuronate isomerase [Bacillus tequilensis]	0	RMVO01P001165
MUG00656.1	392	NAD(P)/FAD-dependent oxidoreductase	NAD(P)/FAD-dependent oxidoreductase [Bacillus tequilensis]	0	RMVO01P001166
MUG00657.1	140	DUF1641 domain-containing protein	DUF1641 domain-containing protein [Bacillus tequilensis]	0	RMVO01P001167
MUG00658.1	165	cupin domain-containing protein	cupin domain-containing protein [Bacillus tequilensis]	0	RMVO01P001168
MUG00659.1	324	multidrug resistance efflux transporter family protein	multidrug resistance efflux transporter family protein [Bacillus tequilensis]	0	RMVO01P001169
MUG00660.1	250	phosphate ABC transporter ATP-binding protein	phosphate ABC transporter ATP-binding protein [Bacillus tequilensis]	0	RMVO01P001170
MUG00661.1	250	iron export ABC transporter permease subunit FetB	iron export ABC transporter permease subunit FetB [Bacillus tequilensis]	0	RMVO01P001171
MUG00662.1	270	uroporphyrinogen-III synthase	uroporphyrinogen-III synthase [Bacillus tequilensis]	0	RMVO01P001172
MUG00663.1	62	hypothetical protein	hypothetical protein ECC01_06225 [Bacillus tequilensis]	0	RMVO01P001173
MUG00664.1	392	UDP-glucosyltransferase	UDP-glucosyltransferase [Bacillus tequilensis]	0	RMVO01P001174
MUG00665.1	396	cytochrome P450	cytochrome P450 [Bacillus tequilensis]	0	RMVO01P001175
MUG00666.1	92	hypothetical protein	hypothetical protein ECC01_06240 [Bacillus tequilensis]	0	RMVO01P001176
MUG00667.1	208	NUDIX hydrolase	NUDIX hydrolase [Bacillus tequilensis]	0	RMVO01P001177
MUG00668.1	213	DUF4352 domain-containing protein	DUF4352 domain-containing protein [Bacillus tequilensis]	0	RMVO01P001178
MUG00669.1	186	DUF1641 domain-containing protein	DUF1641 domain-containing protein [Bacillus tequilensis]	0	RMVO01P001179
MUG00670.1	985	formate dehydrogenase subunit alpha	formate dehydrogenase subunit alpha [Bacillus tequilensis]	0	RMVO01P001180
MUG00671.1	191	DUF4309 domain-containing protein	DUF4309 domain-containing protein [Bacillus tequilensis]	0	RMVO01P001181
MUG00672.1	132	DUF2809 domain-containing protein	DUF2809 domain-containing protein [Bacillus tequilensis]	0	RMVO01P001182
MUG00673.1	55	putative motility protein	putative motility protein [Bacillus tequilensis]	0	RMVO01P001183
MUG00674.1	157	DUF2690 domain-containing protein	DUF2690 domain-containing protein [Bacillus tequilensis]	0	RMVO01P001184
MUG00675.1	467	DUF4163 domain-containing protein	DUF4163 domain-containing protein [Bacillus tequilensis]	0	RMVO01P001185
MUG00676.1	77	spore coat protein	spore coat protein [Bacillus tequilensis]	0	RMVO01P001186
MUG00677.1	320	protoheme IX farnesyltransferase	protoheme IX farnesyltransferase [Bacillus tequilensis]	0	RMVO01P001187
MUG00678.1	64	hypothetical protein	hypothetical protein ECC01_06305 [Bacillus tequilensis]	0	RMVO01P001188
MUG00679.1	109	DUF4306 domain-containing protein	DUF4306 domain-containing protein [Bacillus tequilensis]	0	RMVO01P001189
MUG00680.1	64	DUF4177 domain-containing protein	DUF4177 domain-containing protein [Bacillus tequilensis]	0	RMVO01P001190
MUG00681.1	159	Cys-tRNA(Pro) deacylase	Cys-tRNA(Pro) deacylase [Bacillus tequilensis]	0	RMVO01P001191
MUG00682.1	131	hypothetical protein	hypothetical protein ECC01_06325 [Bacillus tequilensis]	0	RMVO01P001192
MUG00683.1	168	GNAT family N-acetyltransferase	GNAT family N-acetyltransferase [Bacillus tequilensis]	0	RMVO01P001193
MUG00684.1	160	DUF2992 family protein	DUF2992 family protein [Bacillus tequilensis]	0	RMVO01P001194
MUG00685.1	315	mannose-6-phosphate isomerase, class I	mannose-6-phosphate isomerase, class I [Bacillus tequilensis]	0	RMVO01P001195
MUG00686.1	646	PTS mannose transporter subunit IIABC	PTS mannose transporter subunit IIABC [Bacillus tequilensis]	0	RMVO01P001196
MUG00687.1	648	BglG family transcription antiterminator	BglG family transcription antiterminator [Bacillus tequilensis]	0	RMVO01P001197
MUG00688.1	105	hypothetical protein	hypothetical protein ECC01_06355 [Bacillus tequilensis]	0	RMVO01P001198
MUG00689.1	105	antibiotic biosynthesis monooxygenase	antibiotic biosynthesis monooxygenase [Bacillus tequilensis]	0	RMVO01P001199
MUG00690.1	367	tetratricopeptide repeat protein	tetratricopeptide repeat protein [Bacillus tequilensis]	0	RMVO01P001200
MUG00691.1	126	hypothetical protein	hypothetical protein ECC01_06370 [Bacillus tequilensis]	0	RMVO01P001201
MUG00692.1	219	hypothetical protein	hypothetical protein ECC01_06375 [Bacillus tequilensis]	0	RMVO01P001202
MUG00693.1	620	hypothetical protein	hypothetical protein ECC01_06385 [Bacillus tequilensis]	0	RMVO01P001203
MUG00694.1	96	hypothetical protein	hypothetical protein ECC01_06390 [Bacillus tequilensis]	0	RMVO01P001204
MUG00695.1	100	hypothetical protein	hypothetical protein ECC01_06400 [Bacillus tequilensis]	0	RMVO01P001205
MUG00696.1	176	hypothetical protein	hypothetical protein ECC01_06405 [Bacillus tequilensis]	0	RMVO01P001206
MUG00697.1	254	hypothetical protein	hypothetical protein ECC01_06410 [Bacillus tequilensis]	0	RMVO01P001207
MUG00699.1	76	helix-turn-helix domain-containing protein	helix-turn-helix domain-containing protein [Bacillus tequilensis]	0	RMVO01P001208
MUG00700.1	62	hypothetical protein	hypothetical protein ECC01_06425 [Bacillus tequilensis]	0	RMVO01P001209
MUG00701.1	317	hypothetical protein	hypothetical protein ECC01_06430 [Bacillus tequilensis]	0	RMVO01P001210
MUG00702.1	99	hypothetical protein	hypothetical protein ECC01_06435 [Bacillus tequilensis]	0	RMVO01P001211
MUG00703.1	173	hypothetical protein	hypothetical protein ECC01_06440 [Bacillus tequilensis]	0	RMVO01P001212
MUG00704.1	67	hypothetical protein	hypothetical protein ECC01_06445 [Bacillus tequilensis]	0	RMVO01P001213
MUG00705.1	265	hypothetical protein	hypothetical protein ECC01_06450 [Bacillus tequilensis]	0	RMVO01P001214
MUG00706.1	265	nucleotidyltransferase	nucleotidyltransferase [Bacillus tequilensis]	0	RMVO01P001215
MUG00707.1	241	hypothetical protein	hypothetical protein ECC01_06460 [Bacillus tequilensis]	0	RMVO01P001216
MUG00708.1	377	tetratricopeptide repeat protein	tetratricopeptide repeat protein [Bacillus tequilensis]	0	RMVO01P001217
MUG00709.1	348	DNA (cytosine-5-)-methyltransferase	DNA (cytosine-5-)-methyltransferase [Bacillus tequilensis]	0	RMVO01P001218
MUG00710.1	380	hypothetical protein	hypothetical protein ECC01_06475 [Bacillus tequilensis]	0	RMVO01P001219
MUG00711.1	225	hypothetical protein	hypothetical protein ECC01_06480 [Bacillus tequilensis]	0	RMVO01P001220
MUG00712.1	121	hypothetical protein	hypothetical protein ECC01_06485 [Bacillus tequilensis]	0	RMVO01P001221
MUG00713.1	132	hypothetical protein	hypothetical protein ECC01_06490 [Bacillus tequilensis]	0	RMVO01P001222
MUG00714.1	138	hypothetical protein	hypothetical protein ECC01_06495 [Bacillus tequilensis]	0	RMVO01P001223
MUG00715.1	216	HD domain-containing protein	HD domain-containing protein [Bacillus tequilensis]	0	RMVO01P001224
MUG00716.1	285	PD-(D/E)XK nuclease family protein	PD-(D/E)XK nuclease family protein [Bacillus tequilensis]	0	RMVO01P001225
MUG00717.1	349	hypothetical protein	hypothetical protein ECC01_06510 [Bacillus tequilensis]	0	RMVO01P001226
MUG00718.1	77	hypothetical protein	hypothetical protein ECC01_06515 [Bacillus tequilensis]	0	RMVO01P001227
MUG00719.1	184	crossover junction endodeoxyribonuclease RuvC	crossover junction endodeoxyribonuclease RuvC [Bacillus tequilensis]	0	RMVO01P001228
MUG00720.1	128	hypothetical protein	hypothetical protein ECC01_06525 [Bacillus tequilensis]	0	RMVO01P001229
MUG00721.1	178	hypothetical protein	hypothetical protein ECC01_06530 [Bacillus tequilensis]	0	RMVO01P001230
MUG00722.1	249	hypothetical protein	hypothetical protein ECC01_06535 [Bacillus tequilensis]	0	RMVO01P001231
MUG00723.1	404	hypothetical protein	hypothetical protein ECC01_06540 [Bacillus tequilensis]	0	RMVO01P001232
MUG00724.1	60	hypothetical protein	hypothetical protein ECC01_06545 [Bacillus tequilensis]	0	RMVO01P001233
MUG00725.1	130	hypothetical protein	hypothetical protein ECC01_06550 [Bacillus tequilensis]	0	RMVO01P001234
MUG00726.1	124	thioredoxin family protein	thioredoxin family protein [Bacillus tequilensis]	0	RMVO01P001235
MUG00727.1	343	hypothetical protein	hypothetical protein ECC01_06560 [Bacillus tequilensis]	0	RMVO01P001236
MUG00728.1	244	hypothetical protein	hypothetical protein ECC01_06565 [Bacillus tequilensis]	0	RMVO01P001237
MUG00729.1	245	sigma-70 family RNA polymerase sigma factor	sigma-70 family RNA polymerase sigma factor [Bacillus tequilensis]	0	RMVO01P001238
MUG00730.1	108	hypothetical protein	hypothetical protein ECC01_06575 [Bacillus tequilensis]	0	RMVO01P001239
MUG00731.1	258	hypothetical protein	hypothetical protein ECC01_06580 [Bacillus tequilensis]	0	RMVO01P001240
MUG00732.1	93	hypothetical protein	hypothetical protein ECC01_06585 [Bacillus tequilensis]	0	RMVO01P001241
MUG00733.1	99	HU family DNA-binding protein	HU family DNA-binding protein [Bacillus tequilensis]	0	RMVO01P001242
MUG00734.1	74	hypothetical protein	hypothetical protein ECC01_06595 [Bacillus tequilensis]	0	RMVO01P001243
MUG00735.1	203	hypothetical protein	hypothetical protein ECC01_06600 [Bacillus tequilensis]	0	RMVO01P001244
MUG00736.1	320	sigma-70 family RNA polymerase sigma factor	sigma-70 family RNA polymerase sigma factor [Bacillus tequilensis]	0	RMVO01P001245
MUG00737.1	123	nucleotide pyrophosphohydrolase	nucleotide pyrophosphohydrolase [Bacillus tequilensis]	0	RMVO01P001246
MUG00738.1	100	hypothetical protein	hypothetical protein ECC01_06615 [Bacillus tequilensis]	0	RMVO01P001247
MUG00739.1	96	hypothetical protein	hypothetical protein ECC01_06620 [Bacillus tequilensis]	0	RMVO01P001248
MUG00740.1	305	flagellin	flagellin [Bacillus tequilensis]	0	RMVO01P001249
MUG00741.1	69	carbon storage regulator	carbon storage regulator [Bacillus tequilensis]	0	RMVO01P001250
MUG00742.1	401	LysM peptidoglycan-binding domain-containing protein	LysM peptidoglycan-binding domain-containing protein [Bacillus tequilensis]	0	RMVO01P001251
MUG00743.1	102	hypothetical protein	hypothetical protein ECC01_06640 [Bacillus tequilensis]	0	RMVO01P001252
MUG00744.1	117	hypothetical protein	hypothetical protein ECC01_06645 [Bacillus tequilensis]	0	RMVO01P001253
MUG00745.1	285	site-specific tyrosine recombinase XerD	site-specific tyrosine recombinase XerD [Bacillus tequilensis]	0	RMVO01P001254
MUG00746.1	1284	DNRLRE domain-containing protein	DNRLRE domain-containing protein [Bacillus tequilensis]	0	RMVO01P001255
MUG00747.1	948	halomucin	halomucin [Bacillus tequilensis]	0	RMVO01P001256
MUG00748.1	203	hypothetical protein	hypothetical protein ECC01_06665 [Bacillus tequilensis]	0	RMVO01P001257
MUG00749.1	163	hypothetical protein	hypothetical protein ECC01_06670 [Bacillus tequilensis]	0	RMVO01P001258
MUG00750.1	148	hypothetical protein	hypothetical protein ECC01_06675 [Bacillus tequilensis]	0	RMVO01P001259
MUG00751.1	243	hypothetical protein	hypothetical protein ECC01_06680 [Bacillus tequilensis]	0	RMVO01P001260
MUG00752.1	374	hypothetical protein	hypothetical protein ECC01_06685 [Bacillus tequilensis]	0	RMVO01P001261
MUG00753.1	1210	hypothetical protein	hypothetical protein ECC01_06690 [Bacillus tequilensis]	0	RMVO01P001262
MUG00754.1	629	hypothetical protein	hypothetical protein ECC01_06695 [Bacillus tequilensis]	0	RMVO01P001263
MUG00755.1	711	hypothetical protein	hypothetical protein ECC01_06700 [Bacillus tequilensis]	0	RMVO01P001264
MUG00756.1	561	hypothetical protein	hypothetical protein ECC01_06705 [Bacillus tequilensis]	0	RMVO01P001265
MUG00757.1	516	hypothetical protein	hypothetical protein ECC01_06710 [Bacillus tequilensis]	0	RMVO01P001266
MUG00758.1	99	hypothetical protein	hypothetical protein ECC01_06715 [Bacillus tequilensis]	0	RMVO01P001267
MUG00759.1	849	hypothetical protein	hypothetical protein ECC01_06720 [Bacillus tequilensis]	0	RMVO01P001268
MUG00760.1	152	hypothetical protein	hypothetical protein ECC01_06725 [Bacillus tequilensis]	0	RMVO01P001269
MUG00761.1	260	hypothetical protein	hypothetical protein ECC01_06730 [Bacillus tequilensis]	0	RMVO01P001270
MUG00762.1	1162	M23 family metallopeptidase	M23 family metallopeptidase [Bacillus tequilensis]	0	RMVO01P001271
MUG00763.1	357	hypothetical protein	hypothetical protein ECC01_06740 [Bacillus tequilensis]	0	RMVO01P001272
MUG00764.1	205	S-layer homology domain-containing protein	S-layer homology domain-containing protein [Bacillus tequilensis]	0	RMVO01P001273
MUG00766.1	91	hypothetical protein	hypothetical protein ECC01_06755 [Bacillus tequilensis]	0	RMVO01P001274
MUG00767.1	163	DNA polymerase III subunit gamma/tau	DNA polymerase III subunit gamma/tau [Bacillus tequilensis]	0	RMVO01P001275
MUG00768.1	363	hypothetical protein	hypothetical protein ECC01_06765 [Bacillus tequilensis]	0	RMVO01P001276
MUG00769.1	149	hypothetical protein	hypothetical protein ECC01_06770 [Bacillus tequilensis]	0	RMVO01P001277
MUG00770.1	205	hypothetical protein	hypothetical protein ECC01_06775 [Bacillus tequilensis]	0	RMVO01P001278
MUG00771.1	207	hypothetical protein	hypothetical protein ECC01_06780 [Bacillus tequilensis]	0	RMVO01P001279
MUG00772.1	151	hypothetical protein	hypothetical protein ECC01_06785 [Bacillus tequilensis]	0	RMVO01P001280
MUG00773.1	154	hypothetical protein	hypothetical protein ECC01_06790 [Bacillus tequilensis]	0	RMVO01P001281
MUG00774.1	337	hypothetical protein	hypothetical protein ECC01_06795 [Bacillus tequilensis]	0	RMVO01P001282
MUG00775.1	133	hypothetical protein	hypothetical protein ECC01_06800 [Bacillus tequilensis]	0	RMVO01P001283
MUG00776.1	478	hypothetical protein	hypothetical protein ECC01_06805 [Bacillus tequilensis]	0	RMVO01P001284
MUG00777.1	486	hypothetical protein	hypothetical protein ECC01_06810 [Bacillus tequilensis]	0	RMVO01P001285
MUG00778.1	116	hypothetical protein	hypothetical protein ECC01_06815 [Bacillus tequilensis]	0	RMVO01P001286
MUG00779.1	564	hypothetical protein	hypothetical protein ECC01_06820 [Bacillus tequilensis]	0	RMVO01P001287
MUG00780.1	257	hypothetical protein	hypothetical protein ECC01_06825 [Bacillus tequilensis]	0	RMVO01P001288
MUG00781.1	197	hypothetical protein	hypothetical protein ECC01_06830 [Bacillus tequilensis]	0	RMVO01P001289
MUG00783.1	700	class 1b ribonucleoside-diphosphate reductase subunit alpha	class 1b ribonucleoside-diphosphate reductase subunit alpha [Bacillus tequilensis]	0	RMVO01P001290
MUG00784.1	35	hypothetical protein	hypothetical protein ECC01_06845 [Bacillus tequilensis]	0	RMVO01P001291
MUG00785.1	329	class 1b ribonucleoside-diphosphate reductase subunit beta	class 1b ribonucleoside-diphosphate reductase subunit beta [Bacillus tequilensis]	0	RMVO01P001292
MUG00786.1	60	hypothetical protein	hypothetical protein ECC01_06855 [Bacillus tequilensis]	0	RMVO01P001293
MUG00787.1	80	hypothetical protein	hypothetical protein ECC01_06860 [Bacillus tequilensis]	0	RMVO01P001294
MUG00788.1	362	hypothetical protein	hypothetical protein ECC01_06865 [Bacillus tequilensis]	0	RMVO01P001295
MUG00789.1	80	hypothetical protein	hypothetical protein ECC01_06870 [Bacillus tequilensis]	0	RMVO01P001296
MUG00790.1	137	cell division protein DedD	cell division protein DedD [Bacillus tequilensis]	0	RMVO01P001297
MUG00791.1	219	hypothetical protein	hypothetical protein ECC01_06880 [Bacillus tequilensis]	0	RMVO01P001298
MUG00792.1	71	hypothetical protein	hypothetical protein ECC01_06885 [Bacillus tequilensis]	0	RMVO01P001299
MUG00793.1	68	hypothetical protein	hypothetical protein ECC01_06890 [Bacillus tequilensis]	0	RMVO01P001300
MUG00794.1	149	hypothetical protein	hypothetical protein ECC01_06895 [Bacillus tequilensis]	0	RMVO01P001301
MUG00795.1	453	hypothetical protein	hypothetical protein ECC01_06900 [Bacillus tequilensis]	0	RMVO01P001302
MUG00796.1	90	hypothetical protein	hypothetical protein ECC01_06905 [Bacillus tequilensis]	0	RMVO01P001303
MUG00797.1	138	hypothetical protein	hypothetical protein ECC01_06910 [Bacillus tequilensis]	0	RMVO01P001304
MUG00798.1	412	hypothetical protein	hypothetical protein ECC01_06915 [Bacillus tequilensis]	0	RMVO01P001305
MUG00799.1	371	M42 family metallopeptidase	M42 family metallopeptidase [Bacillus tequilensis]	0	RMVO01P001306
MUG00800.1	110	hypothetical protein	hypothetical protein ECC01_06925 [Bacillus tequilensis]	0	RMVO01P001307
MUG00801.1	173	hypothetical protein	hypothetical protein ECC01_06930 [Bacillus tequilensis]	0	RMVO01P001308
MUG00802.1	112	hypothetical protein	hypothetical protein ECC01_06935 [Bacillus tequilensis]	0	RMVO01P001309
MUG00803.1	93	hypothetical protein	hypothetical protein ECC01_06940 [Bacillus tequilensis]	0	RMVO01P001310
MUG00804.1	90	helix-turn-helix domain-containing protein	helix-turn-helix domain-containing protein [Bacillus tequilensis]	0	RMVO01P001311
MUG00805.1	187	hypothetical protein	hypothetical protein ECC01_06950 [Bacillus tequilensis]	0	RMVO01P001312
MUG00806.1	133	hypothetical protein	hypothetical protein ECC01_06955 [Bacillus tequilensis]	0	RMVO01P001313
MUG00807.1	93	transcriptional regulator	transcriptional regulator [Bacillus tequilensis]	0	RMVO01P001314
MUG00808.1	174	hypothetical protein	hypothetical protein ECC01_06965 [Bacillus tequilensis]	0	RMVO01P001315
MUG00809.1	65	hypothetical protein	hypothetical protein ECC01_06970 [Bacillus tequilensis]	0	RMVO01P001316
MUG00810.1	171	DUF262 domain-containing protein	DUF262 domain-containing protein [Bacillus tequilensis]	0	RMVO01P001317
MUG00811.1	570	DEAD/DEAH box helicase	DEAD/DEAH box helicase [Bacillus tequilensis]	0	RMVO01P001318
MUG00812.1	84	hypothetical protein	hypothetical protein ECC01_06985 [Bacillus tequilensis]	0	RMVO01P001319
MUG00813.1	72	hypothetical protein	hypothetical protein ECC01_06990 [Bacillus tequilensis]	0	RMVO01P001320
MUG00814.1	257	hypothetical protein	hypothetical protein ECC01_06995 [Bacillus tequilensis]	0	RMVO01P001321
MUG00815.1	103	hypothetical protein	hypothetical protein ECC01_07000 [Bacillus tequilensis]	0	RMVO01P001322
MUG00816.1	120	hypothetical protein	hypothetical protein ECC01_07005 [Bacillus tequilensis]	0	RMVO01P001323
MUG00817.1	128	hypothetical protein	hypothetical protein ECC01_07010 [Bacillus tequilensis]	0	RMVO01P001324
MUG00818.1	358	hypothetical protein	hypothetical protein ECC01_07015 [Bacillus tequilensis]	0	RMVO01P001325
MUG00819.1	256	ATP-binding protein	ATP-binding protein [Bacillus tequilensis]	0	RMVO01P001326
MUG00820.1	154	hypothetical protein	hypothetical protein ECC01_07025 [Bacillus tequilensis]	0	RMVO01P001327
MUG00821.1	429	DNA helicase	DNA helicase [Bacillus tequilensis]	0	RMVO01P001328
MUG00822.1	357	hypothetical protein	hypothetical protein ECC01_07035 [Bacillus tequilensis]	0	RMVO01P001329
MUG00823.1	191	sigma-70 family RNA polymerase sigma factor	sigma-70 family RNA polymerase sigma factor [Bacillus tequilensis]	0	RMVO01P001330
MUG00824.1	250	hypothetical protein	hypothetical protein ECC01_07045 [Bacillus tequilensis]	0	RMVO01P001331
MUG00826.1	125	hypothetical protein	hypothetical protein ECC01_07060 [Bacillus tequilensis]	0	RMVO01P001332
MUG00827.1	69	hypothetical protein	hypothetical protein ECC01_07065 [Bacillus tequilensis]	0	RMVO01P001333
MUG00828.1	394	site-specific integrase	site-specific integrase [Bacillus tequilensis]	0	RMVO01P001334
MUG00829.1	396	DUF819 domain-containing protein	DUF819 domain-containing protein [Bacillus tequilensis]	0	RMVO01P001335
MUG00830.1	181	GNAT family N-acetyltransferase	GNAT family N-acetyltransferase [Bacillus tequilensis]	0	RMVO01P001336
MUG00831.1	390	cystathionine beta-lyase	cystathionine beta-lyase [Bacillus tequilensis]	0	RMVO01P001337
MUG00833.1	240	esterase family protein	esterase family protein [Bacillus tequilensis]	0	RMVO01P001338
MUG00834.1	171	hypothetical protein	hypothetical protein ECC01_07105 [Bacillus tequilensis]	0	RMVO01P001339
MUG00835.1	140	GNAT family N-acetyltransferase	GNAT family N-acetyltransferase [Bacillus tequilensis]	0	RMVO01P001340
MUG00836.1	84	hypothetical protein	hypothetical protein ECC01_07115 [Bacillus tequilensis]	0	RMVO01P001341
MUG00837.1	759	ATP-dependent helicase	ATP-dependent helicase [Bacillus tequilensis]	0	RMVO01P001342
MUG00838.1	84	sporulation-specific transcription factor SpoVIF	sporulation-specific transcription factor SpoVIF [Bacillus tequilensis]	0	RMVO01P001343
MUG00839.1	49	sporulation protein YjcZ	sporulation protein YjcZ [Bacillus tequilensis]	0	RMVO01P001344
MUG00840.1	68	hypothetical protein	hypothetical protein ECC01_07135 [Bacillus tequilensis]	0	RMVO01P001345
MUG00841.1	118	DUF1360 domain-containing protein	DUF1360 domain-containing protein [Bacillus tequilensis]	0	RMVO01P001346
MUG00842.1	128	spore coat protein V	spore coat protein V [Bacillus tequilensis]	0	RMVO01P001347
MUG00843.1	109	spore coat protein	spore coat protein [Bacillus tequilensis]	0	RMVO01P001348
MUG00844.1	171	spore coat protein	spore coat protein [Bacillus tequilensis]	0	RMVO01P001349
MUG00845.1	162	spore coat protein Y	spore coat protein Y [Bacillus tequilensis]	0	RMVO01P001350
MUG00846.1	148	spore coat protein Z	spore coat protein Z [Bacillus tequilensis]	0	RMVO01P001351
MUG00847.1	227	spore coat protein	spore coat protein [Bacillus tequilensis]	0	RMVO01P001352
MUG00848.1	258	enoyl-ACP reductase FabI	enoyl-ACP reductase FabI [Bacillus tequilensis]	0	RMVO01P001353
MUG00849.1	271	bifunctional hydroxymethylpyrimidine kinase/phosphomethylpyrimidine kinase	bifunctional hydroxymethylpyrimidine kinase/phosphomethylpyrimidine kinase [Bacillus tequilensis]	0	RMVO01P001354
MUG00850.1	336	thiazole biosynthesis adenylyltransferase ThiF	thiazole biosynthesis adenylyltransferase ThiF [Bacillus tequilensis]	0	RMVO01P001355
MUG00851.1	256	thiazole synthase	thiazole synthase [Bacillus tequilensis]	0	RMVO01P001356
MUG00853.1	369	glycine oxidase ThiO	glycine oxidase ThiO [Bacillus tequilensis]	0	RMVO01P001357
MUG00854.1	205	thiazole tautomerase TenI	thiazole tautomerase TenI [Bacillus tequilensis]	0	RMVO01P001358
MUG00855.1	236	thiaminase II	thiaminase II [Bacillus tequilensis]	0	RMVO01P001359
MUG00856.1	614	sodium:proton antiporter	sodium:proton antiporter [Bacillus tequilensis]	0	RMVO01P001360
MUG00857.1	244	bis(5'-nucleosyl)-tetraphosphatase PrpE	bis(5'-nucleosyl)-tetraphosphatase PrpE [Bacillus tequilensis]	0	RMVO01P001361
MUG00859.1	266	NAD(+) kinase	NAD(+) kinase [Bacillus tequilensis]	0	RMVO01P001362
MUG00860.1	211	GTP pyrophosphokinase YjbM	GTP pyrophosphokinase YjbM [Bacillus tequilensis]	0	RMVO01P001363
MUG00861.1	122	hypothetical protein	hypothetical protein ECC01_07240 [Bacillus tequilensis]	0	RMVO01P001364
MUG00862.1	190	CYTH domain-containing protein	CYTH domain-containing protein [Bacillus tequilensis]	0	RMVO01P001365
MUG00864.1	132	thiol management oxidoreductase	thiol management oxidoreductase [Bacillus tequilensis]	0	RMVO01P001366
MUG00865.1	299	DsbA family protein	DsbA family protein [Bacillus tequilensis]	0	RMVO01P001367
MUG00866.1	67	hypothetical protein	hypothetical protein ECC01_07265 [Bacillus tequilensis]	0	RMVO01P001368
MUG00867.1	55	hypothetical protein	hypothetical protein ECC01_07270 [Bacillus tequilensis]	0	RMVO01P001369
MUG00868.1	670	oligoendopeptidase F	oligoendopeptidase F [Bacillus tequilensis]	0	RMVO01P001370
MUG00869.1	383	competence protein CoiA	competence protein CoiA [Bacillus tequilensis]	0	RMVO01P001371
MUG00870.1	218	adaptor protein MecA	adaptor protein MecA [Bacillus tequilensis]	0	RMVO01P001372
MUG00871.1	46	hypothetical protein	hypothetical protein ECC01_07295 [Bacillus tequilensis]	0	RMVO01P001373
MUG00872.1	218	TerC family protein	TerC family protein [Bacillus tequilensis]	0	RMVO01P001374
MUG00873.1	131	transcriptional regulator Spx	transcriptional regulator Spx [Bacillus tequilensis]	0	RMVO01P001375
MUG00874.1	192	GNAT family N-acetyltransferase	GNAT family N-acetyltransferase [Bacillus tequilensis]	0	RMVO01P001376
MUG00875.1	405	MFS transporter	MFS transporter [Bacillus tequilensis]	0	RMVO01P001377
MUG00876.1	305	ATP-binding cassette domain-containing protein	ATP-binding cassette domain-containing protein [Bacillus tequilensis]	0	RMVO01P001378
MUG00877.1	358	ABC transporter ATP-binding protein	ABC transporter ATP-binding protein [Bacillus tequilensis]	0	RMVO01P001379
MUG00878.1	305	ABC transporter permease	ABC transporter permease [Bacillus tequilensis]	0	RMVO01P001380
MUG00879.1	311	ABC transporter permease	ABC transporter permease [Bacillus tequilensis]	0	RMVO01P001381
MUG00880.1	545	peptide ABC transporter substrate-binding protein	peptide ABC transporter substrate-binding protein [Bacillus tequilensis]	0	RMVO01P001382
MUG00881.1	330	tryptophan--tRNA ligase	tryptophan--tRNA ligase [Bacillus tequilensis]	0	RMVO01P001383
MUG00882.1	250	DUF3603 family protein	DUF3603 family protein [Bacillus tequilensis]	0	RMVO01P001384
MUG00883.1	304	ABC transporter permease	ABC transporter permease [Bacillus tequilensis]	0	RMVO01P001385
MUG00884.1	316	ABC transporter permease	ABC transporter permease [Bacillus tequilensis]	0	RMVO01P001386
MUG00885.1	542	peptide-binding protein	peptide-binding protein [Bacillus tequilensis]	0	RMVO01P001387
MUG00886.1	329	dipeptide ABC transporter ATP-binding protein	dipeptide ABC transporter ATP-binding protein [Bacillus tequilensis]	0	RMVO01P001388
MUG00887.1	328	ABC transporter ATP-binding protein	ABC transporter ATP-binding protein [Bacillus tequilensis]	0	RMVO01P001389
MUG00888.1	261	hypothetical protein	hypothetical protein ECC01_07380 [Bacillus tequilensis]	0	RMVO01P001390
MUG00889.1	413	beta-ketoacyl-ACP synthase II	beta-ketoacyl-ACP synthase II [Bacillus tequilensis]	0	RMVO01P001391
MUG00890.1	312	beta-ketoacyl-ACP synthase III	beta-ketoacyl-ACP synthase III [Bacillus tequilensis]	0	RMVO01P001392
MUG00891.1	78	hypothetical protein	hypothetical protein ECC01_07395 [Bacillus tequilensis]	0	RMVO01P001393
MUG00892.1	63	ComG operon repressor	ComG operon repressor [Bacillus tequilensis]	0	RMVO01P001394
MUG00893.1	317	BMP family ABC transporter substrate-binding protein	BMP family ABC transporter substrate-binding protein [Bacillus tequilensis]	0	RMVO01P001395
MUG00894.1	185	hypothetical protein	hypothetical protein ECC01_07410 [Bacillus tequilensis]	0	RMVO01P001396
MUG00895.1	244	hypothetical protein	hypothetical protein ECC01_07415 [Bacillus tequilensis]	0	RMVO01P001397
MUG00896.1	61	DUF2929 domain-containing protein	DUF2929 domain-containing protein [Bacillus tequilensis]	0	RMVO01P001398
MUG00898.1	319	ornithine carbamoyltransferase	ornithine carbamoyltransferase [Bacillus tequilensis]	0	RMVO01P001399
MUG00899.1	1030	carbamoyl phosphate synthase large subunit	carbamoyl phosphate synthase large subunit [Bacillus tequilensis]	0	RMVO01P001400
MUG00900.1	353	carbamoyl phosphate synthase small subunit	carbamoyl phosphate synthase small subunit [Bacillus tequilensis]	0	RMVO01P001401
MUG00901.1	385	acetylornithine transaminase	acetylornithine transaminase [Bacillus tequilensis]	0	RMVO01P001402
MUG00902.1	258	acetylglutamate kinase	acetylglutamate kinase [Bacillus tequilensis]	0	RMVO01P001403
MUG00903.1	406	bifunctional ornithine acetyltransferase/N-acetylglutamate synthase	bifunctional ornithine acetyltransferase/N-acetylglutamate synthase [Bacillus tequilensis]	0	RMVO01P001404
MUG00904.1	345	N-acetyl-gamma-glutamyl-phosphate reductase	N-acetyl-gamma-glutamyl-phosphate reductase [Bacillus tequilensis]	0	RMVO01P001405
MUG00906.1	476	FAD-binding oxidoreductase	FAD-binding oxidoreductase [Bacillus tequilensis]	0	RMVO01P001406
MUG00907.1	56	YqaE/Pmp3 family membrane protein	YqaE/Pmp3 family membrane protein [Bacillus tequilensis]	0	RMVO01P001407
MUG00908.1	102	metal-sulfur cluster assembly factor	metal-sulfur cluster assembly factor [Bacillus tequilensis]	0	RMVO01P001408
MUG00909.1	255	esterase	esterase [Bacillus tequilensis]	0	RMVO01P001409
MUG00910.1	270	HAD family phosphatase	HAD family phosphatase [Bacillus tequilensis]	0	RMVO01P001410
MUG00911.1	65	DUF3813 domain-containing protein	DUF3813 domain-containing protein [Bacillus tequilensis]	0	RMVO01P001411
MUG00913.1	280	YitT family protein	YitT family protein [Bacillus tequilensis]	0	RMVO01P001412
MUG00914.1	283	DegV family protein	DegV family protein [Bacillus tequilensis]	0	RMVO01P001413
MUG00915.1	538	peptidase M4 family protein	peptidase M4 family protein [Bacillus tequilensis]	0	RMVO01P001414
MUG00916.1	97	DUF3784 domain-containing protein	DUF3784 domain-containing protein [Bacillus tequilensis]	0	RMVO01P001415
MUG00917.1	193	hypothetical protein	hypothetical protein ECC01_07525 [Bacillus tequilensis]	0	RMVO01P001416
MUG00918.1	115	PadR family transcriptional regulator	PadR family transcriptional regulator [Bacillus tequilensis]	0	RMVO01P001417
MUG00919.1	178	SdpA family antimicrobial peptide system protein	SdpA family antimicrobial peptide system protein [Bacillus tequilensis]	0	RMVO01P001418
MUG00920.1	309	hypothetical protein	hypothetical protein ECC01_07540 [Bacillus tequilensis]	0	RMVO01P001419
MUG00921.1	194	sporulation delaying protein family toxin	sporulation delaying protein family toxin [Bacillus tequilensis]	0	RMVO01P001420
MUG00922.1	298	S1 RNA-binding domain-containing protein	S1 RNA-binding domain-containing protein [Bacillus tequilensis]	0	RMVO01P001421
MUG00923.1	163	YajQ family cyclic di-GMP-binding protein	YajQ family cyclic di-GMP-binding protein [Bacillus tequilensis]	0	RMVO01P001422
MUG00924.1	612	bifunctional homocysteine S-methyltransferase/methylenetetrahydrofolate reductase	bifunctional homocysteine S-methyltransferase/methylenetetrahydrofolate reductase [Bacillus tequilensis]	0	RMVO01P001423
MUG00925.1	149	GNAT family N-acetyltransferase	GNAT family N-acetyltransferase [Bacillus tequilensis]	0	RMVO01P001424
MUG00926.1	282	GNAT family N-acetyltransferase	GNAT family N-acetyltransferase [Bacillus tequilensis]	0	RMVO01P001425
MUG00927.1	422	MFS transporter	MFS transporter [Bacillus tequilensis]	0	RMVO01P001426
MUG00928.1	371	mandelate racemase/muconate lactonizing enzyme family protein	mandelate racemase/muconate lactonizing enzyme family protein [Bacillus tequilensis]	0	RMVO01P001427
MUG00929.1	209	YitT family protein	YitT family protein [Bacillus tequilensis]	0	RMVO01P001428
MUG00930.1	252	phosphosulfolactate synthase	phosphosulfolactate synthase [Bacillus tequilensis]	0	RMVO01P001429
MUG00931.1	228	2-phosphosulfolactate phosphatase	2-phosphosulfolactate phosphatase [Bacillus tequilensis]	0	RMVO01P001430
MUG00932.1	236	phosphoadenylyl-sulfate reductase	phosphoadenylyl-sulfate reductase [Bacillus tequilensis]	0	RMVO01P001431
MUG00933.1	389	sulfate adenylyltransferase	sulfate adenylyltransferase [Bacillus tequilensis]	0	RMVO01P001432
MUG00934.1	199	adenylyl-sulfate kinase	adenylyl-sulfate kinase [Bacillus tequilensis]	0	RMVO01P001433
MUG00935.1	268	alpha/beta hydrolase	alpha/beta hydrolase [Bacillus tequilensis]	0	RMVO01P001434
MUG00936.1	212	pentapeptide repeat-containing protein	pentapeptide repeat-containing protein [Bacillus tequilensis]	0	RMVO01P001435
MUG00937.1	484	PLP-dependent aminotransferase family protein	PLP-dependent aminotransferase family protein [Bacillus tequilensis]	0	RMVO01P001436
MUG00938.1	203	amino acid transporter	amino acid transporter [Bacillus tequilensis]	0	RMVO01P001437
MUG00939.1	169	damage-inducible protein DinB	damage-inducible protein DinB [Bacillus tequilensis]	0	RMVO01P001438
MUG00940.1	334	oxidoreductase	oxidoreductase [Bacillus tequilensis]	0	RMVO01P001439
MUG00941.1	337	LacI family transcriptional regulator	LacI family transcriptional regulator [Bacillus tequilensis]	0	RMVO01P001440
MUG00943.1	455	MATE family efflux transporter	MATE family efflux transporter [Bacillus tequilensis]	0	RMVO01P001441
MUG00944.1	267	phytoene/squalene synthase family protein	phytoene/squalene synthase family protein [Bacillus tequilensis]	0	RMVO01P001442
MUG00945.1	159	DUF664 domain-containing protein	DUF664 domain-containing protein [Bacillus tequilensis]	0	RMVO01P001443
MUG00946.1	614	asparagine synthase (glutamine-hydrolyzing)	asparagine synthase (glutamine-hydrolyzing) [Bacillus tequilensis]	0	RMVO01P001444
MUG00948.1	900	peptidase S8	peptidase S8 [Bacillus tequilensis]	0	RMVO01P001445
MUG00949.1	118	DUF1516 family protein	DUF1516 family protein [Bacillus tequilensis]	0	RMVO01P001446
MUG00950.1	301	fumarylacetoacetate hydrolase family protein	fumarylacetoacetate hydrolase family protein [Bacillus tequilensis]	0	RMVO01P001447
MUG00951.1	307	spore coat protein	spore coat protein [Bacillus tequilensis]	0	RMVO01P001448
MUG00952.1	56	aspartyl-phosphate phosphatase Spo0E family protein	aspartyl-phosphate phosphatase Spo0E family protein [Bacillus tequilensis]	0	RMVO01P001449
MUG00953.1	73	spore germination protein	spore germination protein [Bacillus tequilensis]	0	RMVO01P001450
MUG00954.1	77	spore germination protein GerPB	spore germination protein GerPB [Bacillus tequilensis]	0	RMVO01P001451
MUG00955.1	205	spore gernimation protein GerPC	spore gernimation protein GerPC [Bacillus tequilensis]	0	RMVO01P001452
MUG00956.1	58	spore gernimation protein GerPD	spore gernimation protein GerPD [Bacillus tequilensis]	0	RMVO01P001453
MUG00957.1	133	spore germination protein GerPE	spore germination protein GerPE [Bacillus tequilensis]	0	RMVO01P001454
MUG00958.1	72	spore germination protein	spore germination protein [Bacillus tequilensis]	0	RMVO01P001455
MUG00959.1	100	HNH endonuclease	HNH endonuclease [Bacillus tequilensis]	0	RMVO01P001456
MUG00960.1	1130	SMC family ATPase	SMC family ATPase [Bacillus tequilensis]	0	RMVO01P001457
MUG00961.1	391	exonuclease SbcCD subunit D	exonuclease SbcCD subunit D [Bacillus tequilensis]	0	RMVO01P001458
MUG00962.1	1232	helicase-exonuclease AddAB subunit AddA	helicase-exonuclease AddAB subunit AddA [Bacillus tequilensis]	0	RMVO01P001459
MUG00963.1	1166	helicase-exonuclease AddAB subunit AddB	helicase-exonuclease AddAB subunit AddB [Bacillus tequilensis]	0	RMVO01P001460
MUG00964.1	145	rubrerythrin family protein	rubrerythrin family protein [Bacillus tequilensis]	0	RMVO01P001461
MUG00965.1	108	four-helix bundle copper-binding protein	four-helix bundle copper-binding protein [Bacillus tequilensis]	0	RMVO01P001462
MUG00966.1	575	SgrR family transcriptional regulator	SgrR family transcriptional regulator [Bacillus tequilensis]	0	RMVO01P001463
MUG00967.1	401	MFS transporter	MFS transporter [Bacillus tequilensis]	0	RMVO01P001464
MUG00968.1	384	AbrB family transcriptional regulator	AbrB family transcriptional regulator [Bacillus tequilensis]	0	RMVO01P001465
MUG00969.1	329	LacI family DNA-binding transcriptional regulator	LacI family DNA-binding transcriptional regulator [Bacillus tequilensis]	0	RMVO01P001466
MUG00970.1	441	DegT/DnrJ/EryC1/StrS family aminotransferase	DegT/DnrJ/EryC1/StrS family aminotransferase [Bacillus tequilensis]	0	RMVO01P001467
MUG00971.1	282	HAD-IIB family hydrolase	HAD-IIB family hydrolase [Bacillus tequilensis]	0	RMVO01P001468
MUG00972.1	350	Gfo/Idh/MocA family oxidoreductase	Gfo/Idh/MocA family oxidoreductase [Bacillus tequilensis]	0	RMVO01P001469
MUG00973.1	406	sugar MFS transporter	sugar MFS transporter [Bacillus tequilensis]	0	RMVO01P001470
MUG00974.1	65	hypothetical protein	hypothetical protein ECC01_07810 [Bacillus tequilensis]	0	RMVO01P001471
MUG00975.1	175	MarR family transcriptional regulator	MarR family transcriptional regulator [Bacillus tequilensis]	0	RMVO01P001472
MUG00976.1	499	monooxygenase	monooxygenase [Bacillus tequilensis]	0	RMVO01P001473
MUG00977.1	168	Signal peptidase I V	Signal peptidase I V [Bacillus tequilensis]	0	RMVO01P001474
MUG00978.1	207	TVP38/TMEM64 family protein	TVP38/TMEM64 family protein [Bacillus tequilensis]	0	RMVO01P001475
MUG00979.1	123	hypothetical protein	hypothetical protein ECC01_07835 [Bacillus tequilensis]	0	RMVO01P001476
MUG00980.1	66	DUF3311 domain-containing protein	DUF3311 domain-containing protein [Bacillus tequilensis]	0	RMVO01P001477
MUG00981.1	489	sodium:solute symporter family protein	sodium:solute symporter family protein [Bacillus tequilensis]	0	RMVO01P001478
MUG00982.1	89	excalibur calcium-binding domain-containing protein	excalibur calcium-binding domain-containing protein [Bacillus tequilensis]	0	RMVO01P001479
MUG00983.1	299	SDR family oxidoreductase	SDR family oxidoreductase [Bacillus tequilensis]	0	RMVO01P001480
MUG00984.1	192	competence transcription factor	competence transcription factor [Bacillus tequilensis]	0	RMVO01P001481
MUG00985.1	77	IDEAL domain-containing protein	IDEAL domain-containing protein [Bacillus tequilensis]	0	RMVO01P001482
MUG00986.1	285	NAD(P)-dependent oxidoreductase	NAD(P)-dependent oxidoreductase [Bacillus tequilensis]	0	RMVO01P001483
MUG00987.1	509	FAD-dependent oxidoreductase	FAD-dependent oxidoreductase [Bacillus tequilensis]	0	RMVO01P001484
MUG00988.1	432	globin-coupled sensor protein	globin-coupled sensor protein [Bacillus tequilensis]	0	RMVO01P001485
MUG00989.1	186	biotin transporter BioY	biotin transporter BioY [Bacillus tequilensis]	0	RMVO01P001486
MUG00990.1	479	acyl-CoA synthetase	acyl-CoA synthetase [Bacillus tequilensis]	0	RMVO01P001487
MUG00991.1	364	acetyl-CoA C-acyltransferase	acetyl-CoA C-acyltransferase [Bacillus tequilensis]	0	RMVO01P001488
MUG00992.1	193	histidine phosphatase family protein	histidine phosphatase family protein [Bacillus tequilensis]	0	RMVO01P001489
MUG00993.1	323	iron-dicitrate ABC transporter substrate-binding protein	iron-dicitrate ABC transporter substrate-binding protein [Bacillus tequilensis]	0	RMVO01P001490
MUG00994.1	330	acryloyl-CoA reductase	acryloyl-CoA reductase [Bacillus tequilensis]	0	RMVO01P001491
MUG00995.1	149	GNAT family N-acetyltransferase	GNAT family N-acetyltransferase [Bacillus tequilensis]	0	RMVO01P001492
MUG00996.1	381	subtilisin E	subtilisin E [Bacillus tequilensis]	0	RMVO01P001493
MUG00997.1	426	M48 family metallopeptidase	M48 family metallopeptidase [Bacillus tequilensis]	0	RMVO01P001494
MUG00998.1	131	hypothetical protein	hypothetical protein ECC01_07930 [Bacillus tequilensis]	0	RMVO01P001495
MUG00999.1	513	fatty acid--CoA ligase family protein	fatty acid--CoA ligase family protein [Bacillus tequilensis]	0	RMVO01P001496
MUG01000.1	214	SDR family oxidoreductase	SDR family oxidoreductase [Bacillus tequilensis]	0	RMVO01P001497
MUG01001.1	331	lipoate--protein ligase	lipoate--protein ligase [Bacillus tequilensis]	0	RMVO01P001498
MUG01002.1	244	MBL fold metallo-hydrolase	MBL fold metallo-hydrolase [Bacillus tequilensis]	0	RMVO01P001499
MUG01003.1	46	YhfH family protein	YhfH family protein [Bacillus tequilensis]	0	RMVO01P001500
MUG01004.1	429	cation:dicarboxylase symporter family transporter	cation:dicarboxylase symporter family transporter [Bacillus tequilensis]	0	RMVO01P001501
MUG01005.1	135	ASCH domain-containing protein	ASCH domain-containing protein [Bacillus tequilensis]	0	RMVO01P001502
MUG01006.1	346	M42 family metallopeptidase	M42 family metallopeptidase [Bacillus tequilensis]	0	RMVO01P001503
MUG01007.1	68	hypothetical protein	hypothetical protein ECC01_07975 [Bacillus tequilensis]	0	RMVO01P001504
MUG01008.1	258	YhfC family intramembrane metalloprotease	YhfC family intramembrane metalloprotease [Bacillus tequilensis]	0	RMVO01P001505
MUG01009.1	325	ketoacyl-ACP synthase III	ketoacyl-ACP synthase III [Bacillus tequilensis]	0	RMVO01P001506
MUG01010.1	775	YhgE/Pip domain-containing protein	YhgE/Pip domain-containing protein [Bacillus tequilensis]	0	RMVO01P001507
MUG01011.1	191	TetR/AcrR family transcriptional regulator	TetR/AcrR family transcriptional regulator [Bacillus tequilensis]	0	RMVO01P001508
MUG01012.1	470	protoporphyrinogen oxidase	protoporphyrinogen oxidase [Bacillus tequilensis]	0	RMVO01P001509
MUG01013.1	310	ferrochelatase	ferrochelatase [Bacillus tequilensis]	0	RMVO01P001510
MUG01014.1	353	uroporphyrinogen decarboxylase	uroporphyrinogen decarboxylase [Bacillus tequilensis]	0	RMVO01P001511
MUG01015.1	714	penicillin-binding protein	penicillin-binding protein [Bacillus tequilensis]	0	RMVO01P001512
MUG01016.1	166	heme-degrading oxygenase HmoB	heme-degrading oxygenase HmoB [Bacillus tequilensis]	0	RMVO01P001513
MUG01017.1	463	hypothetical protein	hypothetical protein ECC01_08030 [Bacillus tequilensis]	0	RMVO01P001514
MUG01018.1	396	amidohydrolase	amidohydrolase [Bacillus tequilensis]	0	RMVO01P001515
MUG01019.1	236	EcsC family protein	EcsC family protein [Bacillus tequilensis]	0	RMVO01P001516
MUG01020.1	408	ABC transporter permease	ABC transporter permease [Bacillus tequilensis]	0	RMVO01P001517
MUG01021.1	247	ABC transporter ATP-binding protein	ABC transporter ATP-binding protein [Bacillus tequilensis]	0	RMVO01P001518
MUG01022.1	145	HIT family protein	HIT family protein [Bacillus tequilensis]	0	RMVO01P001519
MUG01023.1	359	3-phosphoserine/phosphohydroxythreonine transaminase	3-phosphoserine/phosphohydroxythreonine transaminase [Bacillus tequilensis]	0	RMVO01P001520
MUG01024.1	172	tryptophan transporter	tryptophan transporter [Bacillus tequilensis]	0	RMVO01P001521
MUG01025.1	63	hypothetical protein	hypothetical protein ECC01_08070 [Bacillus tequilensis]	0	RMVO01P001522
MUG01026.1	118	YtxH domain-containing protein	YtxH domain-containing protein [Bacillus tequilensis]	0	RMVO01P001523
MUG01027.1	203	HTH-type transcriptional regulator Hpr	HTH-type transcriptional regulator Hpr [Bacillus tequilensis]	0	RMVO01P001524
MUG01028.1	113	DUF1878 family protein	DUF1878 family protein [Bacillus tequilensis]	0	RMVO01P001525
MUG01029.1	172	DUF3267 domain-containing protein	DUF3267 domain-containing protein [Bacillus tequilensis]	0	RMVO01P001526
MUG01033.1	291	peptidylprolyl isomerase PrsA	peptidylprolyl isomerase PrsA [Bacillus tequilensis]	0	RMVO01P001527
MUG01034.1	70	sporulation protein YhaL	sporulation protein YhaL [Bacillus tequilensis]	0	RMVO01P001528
MUG01035.1	314	3'-5' exoribonuclease YhaM	3'-5' exoribonuclease YhaM [Bacillus tequilensis]	0	RMVO01P001529
MUG01036.1	963	hypothetical protein	hypothetical protein ECC01_08125 [Bacillus tequilensis]	0	RMVO01P001530
MUG01037.1	408	exonuclease SbcCD subunit D	exonuclease SbcCD subunit D [Bacillus tequilensis]	0	RMVO01P001531
MUG01038.1	419	ABC transporter permease	ABC transporter permease [Bacillus tequilensis]	0	RMVO01P001532
MUG01039.1	298	ABC transporter ATP-binding protein	ABC transporter ATP-binding protein [Bacillus tequilensis]	0	RMVO01P001533
MUG01040.1	61	hypothetical protein	hypothetical protein ECC01_08145 [Bacillus tequilensis]	0	RMVO01P001534
MUG01041.1	255	enoyl-CoA hydratase	enoyl-CoA hydratase [Bacillus tequilensis]	0	RMVO01P001535
MUG01043.1	165	K+/H+ antiporter subunit KhtT	K+/H+ antiporter subunit KhtT [Bacillus tequilensis]	0	RMVO01P001536
MUG01044.1	405	cation:proton antiporter	cation:proton antiporter [Bacillus tequilensis]	0	RMVO01P001537
MUG01045.1	501	coproporphyrinogen III oxidase	coproporphyrinogen III oxidase [Bacillus tequilensis]	0	RMVO01P001538
MUG01046.1	288	HAD family phosphatase	HAD family phosphatase [Bacillus tequilensis]	0	RMVO01P001539
MUG01047.1	357	hypothetical protein	hypothetical protein ECC01_08180 [Bacillus tequilensis]	0	RMVO01P001540
MUG01048.1	117	YlbF family regulator	YlbF family regulator [Bacillus tequilensis]	0	RMVO01P001541
MUG01049.1	377	DUF445 family protein	DUF445 family protein [Bacillus tequilensis]	0	RMVO01P001542
MUG01050.1	363	YheC/YheD family protein	YheC/YheD family protein [Bacillus tequilensis]	0	RMVO01P001543
MUG01051.1	453	YheC/YheD family protein	YheC/YheD family protein [Bacillus tequilensis]	0	RMVO01P001544
MUG01052.1	72	hypothetical protein	hypothetical protein ECC01_08205 [Bacillus tequilensis]	0	RMVO01P001545
MUG01053.1	67	alpha/beta-type small acid-soluble spore protein	alpha/beta-type small acid-soluble spore protein [Bacillus tequilensis]	0	RMVO01P001546
MUG01054.1	41	hypothetical protein	hypothetical protein ECC01_08215 [Bacillus tequilensis]	0	RMVO01P001547
MUG01055.1	206	SDR family oxidoreductase	SDR family oxidoreductase [Bacillus tequilensis]	0	RMVO01P001548
MUG01056.1	673	ABC transporter ATP-binding protein	ABC transporter ATP-binding protein [Bacillus tequilensis]	0	RMVO01P001549
MUG01057.1	585	ABC transporter ATP-binding protein	ABC transporter ATP-binding protein [Bacillus tequilensis]	0	RMVO01P001550
MUG01058.1	68	hypothetical protein	hypothetical protein ECC01_08235 [Bacillus tequilensis]	0	RMVO01P001551
MUG01059.1	166	universal stress protein	universal stress protein [Bacillus tequilensis]	0	RMVO01P001552
MUG01060.1	453	Na+/H+ antiporter NhaC	Na+/H+ antiporter NhaC [Bacillus tequilensis]	0	RMVO01P001553
MUG01061.1	282	D-amino-acid transaminase	D-amino-acid transaminase [Bacillus tequilensis]	0	RMVO01P001554
MUG01062.1	282	polysaccharide deacetylase	polysaccharide deacetylase [Bacillus tequilensis]	0	RMVO01P001555
MUG01063.1	247	NAD-dependent protein deacylase	NAD-dependent protein deacylase [Bacillus tequilensis]	0	RMVO01P001556
MUG01064.1	371	mechanosensitive ion channel family protein	mechanosensitive ion channel family protein [Bacillus tequilensis]	0	RMVO01P001557
MUG01065.1	35	hypothetical protein	hypothetical protein ECC01_08270 [Bacillus tequilensis]	0	RMVO01P001558
MUG01066.1	243	glycerophosphodiester phosphodiesterase	glycerophosphodiester phosphodiesterase [Bacillus tequilensis]	0	RMVO01P001559
MUG01067.1	131	CrcB family protein	CrcB family protein [Bacillus tequilensis]	0	RMVO01P001560
MUG01068.1	118	fluoride efflux transporter CrcB	fluoride efflux transporter CrcB [Bacillus tequilensis]	0	RMVO01P001561
MUG01069.1	461	HlyC/CorC family transporter	HlyC/CorC family transporter [Bacillus tequilensis]	0	RMVO01P001562
MUG01070.1	393	pyridoxal phosphate-dependent aminotransferase	pyridoxal phosphate-dependent aminotransferase [Bacillus tequilensis]	0	RMVO01P001563
MUG01072.1	444	HlyC/CorC family transporter	HlyC/CorC family transporter [Bacillus tequilensis]	0	RMVO01P001564
MUG01073.1	199	1-acylglycerol-3-phosphate O-acyltransferase	1-acylglycerol-3-phosphate O-acyltransferase [Bacillus tequilensis]	0	RMVO01P001565
MUG01074.1	331	aldo/keto reductase	aldo/keto reductase [Bacillus tequilensis]	0	RMVO01P001566
MUG01075.1	163	ECF RNA polymerase sigma factor SigM	ECF RNA polymerase sigma factor SigM [Bacillus tequilensis]	0	RMVO01P001567
MUG01076.1	358	anti-sigma-M factor	anti-sigma-M factor [Bacillus tequilensis]	0	RMVO01P001568
MUG01077.1	96	anti-sigma-M factor	anti-sigma-M factor [Bacillus tequilensis]	0	RMVO01P001569
MUG01078.1	142	GNAT family N-acetyltransferase	GNAT family N-acetyltransferase [Bacillus tequilensis]	0	RMVO01P001570
MUG01079.1	469	PLP-dependent aminotransferase family protein	PLP-dependent aminotransferase family protein [Bacillus tequilensis]	0	RMVO01P001571
MUG01080.1	451	sodium-dependent transporter	sodium-dependent transporter [Bacillus tequilensis]	0	RMVO01P001572
MUG01081.1	465	amino acid permease	amino acid permease [Bacillus tequilensis]	0	RMVO01P001573
MUG01082.1	289	glucose 1-dehydrogenase	glucose 1-dehydrogenase [Bacillus tequilensis]	0	RMVO01P001574
MUG01083.1	366	citrate synthase/methylcitrate synthase	citrate synthase/methylcitrate synthase [Bacillus tequilensis]	0	RMVO01P001575
MUG01084.1	291	LysR family transcriptional regulator	LysR family transcriptional regulator [Bacillus tequilensis]	0	RMVO01P001576
MUG01085.1	334	LysM peptidoglycan-binding domain-containing protein	LysM peptidoglycan-binding domain-containing protein [Bacillus tequilensis]	0	RMVO01P001577
MUG01086.1	458	alkaline phosphatase	alkaline phosphatase [Bacillus tequilensis]	0	RMVO01P001578
MUG01087.1	468	stage V sporulation protein SpoVR	stage V sporulation protein SpoVR [Bacillus tequilensis]	0	RMVO01P001579
MUG01088.1	552	hypothetical protein	hypothetical protein ECC01_08385 [Bacillus tequilensis]	0	RMVO01P001580
MUG01089.1	146	nitric oxide-sensing transcriptional repressor NsrR	nitric oxide-sensing transcriptional repressor NsrR [Bacillus tequilensis]	0	RMVO01P001581
MUG01090.1	486	LysM peptidoglycan-binding domain-containing protein	LysM peptidoglycan-binding domain-containing protein [Bacillus tequilensis]	0	RMVO01P001582
MUG01091.1	107	DUF3889 domain-containing protein	DUF3889 domain-containing protein [Bacillus tequilensis]	0	RMVO01P001583
MUG01092.1	80	hypothetical protein	hypothetical protein ECC01_08405 [Bacillus tequilensis]	0	RMVO01P001584
MUG01093.1	174	NAD(P)H-dependent oxidoreductase	NAD(P)H-dependent oxidoreductase [Bacillus tequilensis]	0	RMVO01P001585
MUG01094.1	215	response regulator transcription factor	response regulator transcription factor [Bacillus tequilensis]	0	RMVO01P001586
MUG01095.1	379	GAF domain-containing sensor histidine kinase	GAF domain-containing sensor histidine kinase [Bacillus tequilensis]	0	RMVO01P001587
MUG01096.1	581	phospho-sugar mutase	phospho-sugar mutase [Bacillus tequilensis]	0	RMVO01P001588
MUG01097.1	555	glycerol-3-phosphate dehydrogenase/oxidase	glycerol-3-phosphate dehydrogenase/oxidase [Bacillus tequilensis]	0	RMVO01P001589
MUG01098.1	496	glycerol kinase GlpK	glycerol kinase GlpK [Bacillus tequilensis]	0	RMVO01P001590
MUG01099.1	274	glycerol uptake facilitator protein GlpF	glycerol uptake facilitator protein GlpF [Bacillus tequilensis]	0	RMVO01P001591
MUG01100.1	450	aspartate aminotransferase family protein	aspartate aminotransferase family protein [Bacillus tequilensis]	0	RMVO01P001592
MUG01101.1	513	GNAT family N-acetyltransferase	GNAT family N-acetyltransferase [Bacillus tequilensis]	0	RMVO01P001593
MUG01102.1	220	HAD family hydrolase	HAD family hydrolase [Bacillus tequilensis]	0	RMVO01P001594
MUG01103.1	140	CBS domain-containing protein	CBS domain-containing protein [Bacillus tequilensis]	0	RMVO01P001595
MUG01104.1	131	hypothetical protein	hypothetical protein ECC01_08470 [Bacillus tequilensis]	0	RMVO01P001596
MUG01105.1	302	RluA family pseudouridine synthase	RluA family pseudouridine synthase [Bacillus tequilensis]	0	RMVO01P001597
MUG01106.1	198	sortase	sortase [Bacillus tequilensis]	0	RMVO01P001598
MUG01107.1	1218	LPXTG cell wall anchor domain-containing protein	LPXTG cell wall anchor domain-containing protein [Bacillus tequilensis]	0	RMVO01P001599
MUG01108.1	217	spore coat protein	spore coat protein [Bacillus tequilensis]	0	RMVO01P001600
MUG01109.1	322	hypothetical protein	hypothetical protein ECC01_08495 [Bacillus tequilensis]	0	RMVO01P001601
MUG01110.1	191	YhcN/YlaJ family sporulation lipoprotein	YhcN/YlaJ family sporulation lipoprotein [Bacillus tequilensis]	0	RMVO01P001602
MUG01111.1	148	hypothetical protein	hypothetical protein ECC01_08505 [Bacillus tequilensis]	0	RMVO01P001603
MUG01112.1	105	PadR family transcriptional regulator	PadR family transcriptional regulator [Bacillus tequilensis]	0	RMVO01P001604
MUG01113.1	189	DUF2812 domain-containing protein	DUF2812 domain-containing protein [Bacillus tequilensis]	0	RMVO01P001605
MUG01114.1	463	L-cystine uptake protein TcyP	L-cystine uptake protein TcyP [Bacillus tequilensis]	0	RMVO01P001606
MUG01115.1	359	diguanylate cyclase	diguanylate cyclase [Bacillus tequilensis]	0	RMVO01P001607
MUG01116.1	276	MetQ/NlpA family ABC transporter substrate-binding protein	MetQ/NlpA family ABC transporter substrate-binding protein [Bacillus tequilensis]	0	RMVO01P001608
MUG01117.1	68	hypothetical protein	hypothetical protein ECC01_08535 [Bacillus tequilensis]	0	RMVO01P001609
MUG01118.1	67	cold-shock protein	cold-shock protein [Bacillus tequilensis]	0	RMVO01P001610
MUG01119.1	313	ABC transporter permease	ABC transporter permease [Bacillus tequilensis]	0	RMVO01P001611
MUG01120.1	305	ABC transporter ATP-binding protein	ABC transporter ATP-binding protein [Bacillus tequilensis]	0	RMVO01P001612
MUG01121.1	232	ABC transporter ATP-binding protein	ABC transporter ATP-binding protein [Bacillus tequilensis]	0	RMVO01P001613
MUG01122.1	121	GntR family transcriptional regulator	GntR family transcriptional regulator [Bacillus tequilensis]	0	RMVO01P001614
MUG01123.1	253	hypothetical protein	hypothetical protein ECC01_08565 [Bacillus tequilensis]	0	RMVO01P001615
MUG01124.1	51	hypothetical protein	hypothetical protein ECC01_08570 [Bacillus tequilensis]	0	RMVO01P001616
MUG01125.1	124	hypothetical protein	hypothetical protein ECC01_08575 [Bacillus tequilensis]	0	RMVO01P001617
MUG01126.1	176	flavodoxin family protein	flavodoxin family protein [Bacillus tequilensis]	0	RMVO01P001618
MUG01127.1	532	MFS transporter	MFS transporter [Bacillus tequilensis]	0	RMVO01P001619
MUG01128.1	221	HlyD family secretion protein	HlyD family secretion protein [Bacillus tequilensis]	0	RMVO01P001620
MUG01129.1	154	MarR family transcriptional regulator	MarR family transcriptional regulator [Bacillus tequilensis]	0	RMVO01P001621
MUG01130.1	392	sporulation protein YhbH	sporulation protein YhbH [Bacillus tequilensis]	0	RMVO01P001622
MUG01131.1	631	PrkA family serine protein kinase	PrkA family serine protein kinase [Bacillus tequilensis]	0	RMVO01P001623
MUG01132.1	235	hypothetical protein	hypothetical protein ECC01_08610 [Bacillus tequilensis]	0	RMVO01P001624
MUG01133.1	237	hypothetical protein	hypothetical protein ECC01_08615 [Bacillus tequilensis]	0	RMVO01P001625
MUG01134.1	238	DUF4004 family protein	DUF4004 family protein [Bacillus tequilensis]	0	RMVO01P001626
MUG01135.1	160	tRNA (uridine(34)/cytosine(34)/5-carboxymethylaminomethyluridine(34)-2'-O)-methyltransferase TrmL	tRNA (uridine(34)/cytosine(34)/5-carboxymethylaminomethyluridine(34)-2'-O)-methyltransferase TrmL [Bacillus tequilensis]	0	RMVO01P001627
MUG01136.1	311	amidase domain-containing protein	amidase domain-containing protein [Bacillus tequilensis]	0	RMVO01P001628
MUG01137.1	386	tRNA epoxyqueuosine(34) reductase QueG	tRNA epoxyqueuosine(34) reductase QueG [Bacillus tequilensis]	0	RMVO01P001629
MUG01138.1	207	hypothetical protein	hypothetical protein ECC01_08640 [Bacillus tequilensis]	0	RMVO01P001630
MUG01140.1	157	hypothetical protein	hypothetical protein ECC01_08655 [Bacillus tequilensis]	0	RMVO01P001631
MUG01141.1	89	30S ribosomal protein S14	30S ribosomal protein S14 [Bacillus tequilensis]	0	RMVO01P001632
MUG01143.1	376	FMNH2-dependent alkanesulfonate monooxygenase	FMNH2-dependent alkanesulfonate monooxygenase [Bacillus tequilensis]	0	RMVO01P001633
MUG01144.1	276	ABC transporter permease	ABC transporter permease [Bacillus tequilensis]	0	RMVO01P001634
MUG01145.1	332	aliphatic sulfonate ABC transporter substrate-binding protein	aliphatic sulfonate ABC transporter substrate-binding protein [Bacillus tequilensis]	0	RMVO01P001635
MUG01146.1	255	ABC transporter ATP-binding protein	ABC transporter ATP-binding protein [Bacillus tequilensis]	0	RMVO01P001636
MUG01147.1	483	catalase	catalase [Bacillus tequilensis]	0	RMVO01P001637
MUG01148.1	65	FbpB family small basic protein	FbpB family small basic protein [Bacillus tequilensis]	0	RMVO01P001638
MUG01149.1	590	phosphomethylpyrimidine synthase ThiC	phosphomethylpyrimidine synthase ThiC [Bacillus tequilensis]	0	RMVO01P001639
MUG01151.1	90	spore coat protein	spore coat protein [Bacillus tequilensis]	0	RMVO01P001640
MUG01152.1	67	hypothetical protein	hypothetical protein ECC01_08720 [Bacillus tequilensis]	0	RMVO01P001641
MUG01153.1	258	sporulation control protein Spo0M	sporulation control protein Spo0M [Bacillus tequilensis]	0	RMVO01P001642
MUF99445.1	361	glycosyltransferase	glycosyltransferase [Bacillus tequilensis]	0	RMVO01P001643
MUF99449.1	153	sigma-70 family RNA polymerase sigma factor	sigma-70 family RNA polymerase sigma factor [Bacillus tequilensis]	0	RMVO01P001644
MUF99470.1	37	hypothetical protein	hypothetical protein ECC01_00145 [Bacillus tequilensis]	0	RMVO01P001645
MUF99510.1	229	tRNA (adenine-N(1))-methyltransferase	tRNA (adenine-N(1))-methyltransferase [Bacillus tequilensis]	0	RMVO01P001646
MUF99544.1	376	hypothetical protein	hypothetical protein ECC01_00515 [Bacillus tequilensis]	0	RMVO01P001647
MUF99565.1	190	signal peptidase I	signal peptidase I [Bacillus tequilensis]	0	RMVO01P001648
MUF99567.1	111	helix-turn-helix domain-containing protein	helix-turn-helix domain-containing protein [Bacillus tequilensis]	0	RMVO01P001649
MUF99638.1	507	acyl-CoA carboxylase subunit beta	acyl-CoA carboxylase subunit beta [Bacillus tequilensis]	0	RMVO01P001650
MUF99640.1	242	DUF2071 domain-containing protein	DUF2071 domain-containing protein [Bacillus tequilensis]	0	RMVO01P001651
MUF99642.1	95	membrane protein insertion/folding monitor MifM	membrane protein insertion/folding monitor MifM [Bacillus tequilensis]	0	RMVO01P001652
MUF99658.1	68	hypothetical protein	hypothetical protein ECC01_01090 [Bacillus tequilensis]	0	RMVO01P001653
MUF99666.1	305	alpha/beta hydrolase	alpha/beta hydrolase [Bacillus tequilensis]	0	RMVO01P001654
MUF99688.1	206	stage V sporulation protein AA	stage V sporulation protein AA [Bacillus tequilensis]	0	RMVO01P001655
MUF99695.1	439	diaminopimelate decarboxylase	diaminopimelate decarboxylase [Bacillus tequilensis]	0	RMVO01P001656
MUF99708.1	251	segregation/condensation protein A	segregation/condensation protein A [Bacillus tequilensis]	0	RMVO01P001657
MUF99726.1	352	hypothetical protein	hypothetical protein ECC01_01435 [Bacillus tequilensis]	0	RMVO01P001658
MUF99778.1	185	DUF1405 domain-containing protein	DUF1405 domain-containing protein [Bacillus tequilensis]	0	RMVO01P001659
MUF99795.1	430	asparagine--tRNA ligase	asparagine--tRNA ligase [Bacillus tequilensis]	0	RMVO01P001660
MUF99808.1	168	PTS glucose transporter subunit IIA	PTS glucose transporter subunit IIA [Bacillus tequilensis]	0	RMVO01P001661
MUF99813.1	195	DUF1273 domain-containing protein	DUF1273 domain-containing protein [Bacillus tequilensis]	0	RMVO01P001662
MUF99817.1	63	hypothetical protein	hypothetical protein ECC01_01895 [Bacillus tequilensis]	0	RMVO01P001663
MUF99828.1	371	type III polyketide synthase	type III polyketide synthase [Bacillus tequilensis]	0	RMVO01P001664
MUF99885.1	63	hypothetical protein	hypothetical protein ECC01_02235 [Bacillus tequilensis]	0	RMVO01P001665
MUF99913.1	207	diadenylate cyclase	diadenylate cyclase [Bacillus tequilensis]	0	RMVO01P001666
MUF99953.1	241	AraC family transcriptional regulator	AraC family transcriptional regulator [Bacillus tequilensis]	0	RMVO01P001667
MUF99965.1	82	helix-turn-helix transcriptional regulator	helix-turn-helix transcriptional regulator [Bacillus tequilensis]	0	RMVO01P001668
MUF99966.1	65	permease	permease [Bacillus tequilensis]	0	RMVO01P001669
MUG00014.1	122	replication termination protein	replication termination protein [Bacillus tequilensis]	0	RMVO01P001670
MUG00029.1	755	non-ribosomal peptide synthetase	non-ribosomal peptide synthetase, partial [Bacillus tequilensis]	0	RMVO01P001671
MUG00030.1	1683	amino acid adenylation domain-containing protein	amino acid adenylation domain-containing protein, partial [Bacillus tequilensis]	0	RMVO01P001672
MUG00031.1	1279	amino acid adenylation domain-containing protein	amino acid adenylation domain-containing protein [Bacillus tequilensis]	0	RMVO01P001673
MUG00034.1	60	hypothetical protein	hypothetical protein ECC01_03025 [Bacillus tequilensis]	0	RMVO01P001674
MUG00064.1	48	acid-soluble spore protein SspO	acid-soluble spore protein SspO [Bacillus tequilensis]	0	RMVO01P001675
MUG00071.1	57	aspartyl-phosphate phosphatase Spo0E family protein	aspartyl-phosphate phosphatase Spo0E family protein [Bacillus tequilensis]	0	RMVO01P001676
MUG00112.1	117	hypothetical protein	hypothetical protein ECC01_03440 [Bacillus tequilensis]	0	RMVO01P001677
MUG00115.1	144	SMI1/KNR4 family protein	SMI1/KNR4 family protein [Bacillus tequilensis]	0	RMVO01P001678
MUG00146.1	5488	amino acid adenylation domain-containing protein	amino acid adenylation domain-containing protein [Bacillus tequilensis]	0	RMVO01P001679
MUG00162.1	151	hypothetical protein	hypothetical protein ECC01_03705 [Bacillus tequilensis]	0	RMVO01P001680
MUG00286.1	26	stage V sporulation protein SpoVM	stage V sporulation protein SpoVM [Bacillus tequilensis]	0	RMVO01P001681
MUG00336.1	309	sigma-E processing peptidase SpoIIGA	sigma-E processing peptidase SpoIIGA [Bacillus tequilensis]	0	RMVO01P001682
MUG00354.1	143	transcriptional regulator MraZ	transcriptional regulator MraZ [Bacillus tequilensis]	0	RMVO01P001683
MUG00401.1	142	GNAT family N-acetyltransferase	GNAT family N-acetyltransferase [Bacillus tequilensis]	0	RMVO01P001684
MUG00465.1	164	L,D-transpeptidase	L,D-transpeptidase [Bacillus tequilensis]	0	RMVO01P001685
MUG00477.1	233	GNAT family N-acetyltransferase	GNAT family N-acetyltransferase [Bacillus tequilensis]	0	RMVO01P001686
MUG00491.1	64	hypothetical protein	hypothetical protein ECC01_05355 [Bacillus tequilensis]	0	RMVO01P001687
MUG00582.1	549	peptide ABC transporter substrate-binding protein	peptide ABC transporter substrate-binding protein [Bacillus tequilensis]	0	RMVO01P001688
MUG00588.1	452	serine protease	serine protease [Bacillus tequilensis]	0	RMVO01P001689
MUG00611.1	325	phage-like element PBSX protein XkdQ	phage-like element PBSX protein XkdQ [Bacillus tequilensis]	0	RMVO01P001690
MUG00698.1	66	hypothetical protein	hypothetical protein ECC01_06415 [Bacillus tequilensis]	0	RMVO01P001691
MUG00765.1	1756	phage tail tape measure protein	phage tail tape measure protein [Bacillus tequilensis]	0	RMVO01P001692
MUG00782.1	82	hypothetical protein	hypothetical protein ECC01_06835 [Bacillus tequilensis]	0	RMVO01P001693
MUG00825.1	307	DNA polymerase I	DNA polymerase I [Bacillus tequilensis]	0	RMVO01P001694
MUG00832.1	373	cystathionine gamma-synthase/O-acetylhomoserine thiolyase	cystathionine gamma-synthase/O-acetylhomoserine thiolyase [Bacillus tequilensis]	0	RMVO01P001695
MUG00852.1	66	sulfur carrier protein ThiS	sulfur carrier protein ThiS [Bacillus tequilensis]	0	RMVO01P001696
MUG00858.1	283	RluA family pseudouridine synthase	RluA family pseudouridine synthase [Bacillus tequilensis]	0	RMVO01P001697
MUG00863.1	181	lytic transglycosylase domain-containing protein	lytic transglycosylase domain-containing protein [Bacillus tequilensis]	0	RMVO01P001698
MUG00897.1	59	YjzC family protein	YjzC family protein [Bacillus tequilensis]	0	RMVO01P001699
MUG00905.1	164	MFS transporter	MFS transporter [Bacillus tequilensis]	0	RMVO01P001700
MUG00912.1	119	proteinase inhibitor	proteinase inhibitor [Bacillus tequilensis]	0	RMVO01P001701
MUG00942.1	287	AraC family transcriptional regulator	AraC family transcriptional regulator [Bacillus tequilensis]	0	RMVO01P001702
MUG00947.1	193	DUF2777 domain-containing protein	DUF2777 domain-containing protein [Bacillus tequilensis]	0	RMVO01P001703
MUG01030.1	60	hypothetical protein	hypothetical protein ECC01_08095 [Bacillus tequilensis]	0	RMVO01P001704
MUG01032.1	28	sporulation protein YhzE1	sporulation protein YhzE1 [Bacillus tequilensis]	0	RMVO01P001705
MUG01031.1	28	sporulation protein YhzE2	sporulation protein YhzE2 [Bacillus tequilensis]	0	RMVO01P001706
MUG01042.1	112	K(+)/H(+) antiporter modulator KhtS	K(+)/H(+) antiporter modulator KhtS [Bacillus tequilensis]	0	RMVO01P001707
MUG01071.1	143	MerR family transcriptional regulator	MerR family transcriptional regulator [Bacillus tequilensis]	0	RMVO01P001708
MUG01139.1	66	helix-turn-helix transcriptional regulator	helix-turn-helix transcriptional regulator [Bacillus tequilensis]	0	RMVO01P001709
MUG01142.1	178	hypothetical protein	hypothetical protein ECC01_08665 [Bacillus tequilensis]	0	RMVO01P001710
MUG01150.1	230	peptidase E	peptidase E [Bacillus tequilensis]	0	RMVO01P001711
MUG01154.1	821	DNA gyrase subunit A	DNA gyrase subunit A [Bacillus tequilensis]	0	RMVO01P001712
MUG01156.1	81	DUF370 domain-containing protein	DUF370 domain-containing protein [Bacillus tequilensis]	0	RMVO01P001713
MUG01157.1	370	DNA replication/repair protein RecF	DNA replication/repair protein RecF [Bacillus tequilensis]	0	RMVO01P001714
MUG01158.1	71	S4 domain-containing protein YaaA	S4 domain-containing protein YaaA [Bacillus tequilensis]	0	RMVO01P001715
MUG01159.1	378	DNA polymerase III subunit beta	DNA polymerase III subunit beta [Bacillus tequilensis]	0	RMVO01P001716
MUG01160.1	446	chromosomal replication initiator protein DnaA	chromosomal replication initiator protein DnaA [Bacillus tequilensis]	0	RMVO01P001717
MUG01161.1	44	50S ribosomal protein L34	50S ribosomal protein L34 [Bacillus tequilensis]	0	RMVO01P001718
MUG01162.1	116	ribonuclease P protein component	ribonuclease P protein component [Bacillus tequilensis]	0	RMVO01P001719
MUG01163.1	261	YidC family membrane integrase SpoIIIJ	YidC family membrane integrase SpoIIIJ [Bacillus tequilensis]	0	RMVO01P001720
MUG01164.1	208	protein jag	protein jag [Bacillus tequilensis]	0	RMVO01P001721
MUG01165.1	459	tRNA uridine-5-carboxymethylaminomethyl(34) synthesis GTPase MnmE	tRNA uridine-5-carboxymethylaminomethyl(34) synthesis GTPase MnmE [Bacillus tequilensis]	0	RMVO01P001722
MUG01166.1	628	tRNA uridine-5-carboxymethylaminomethyl(34) synthesis enzyme MnmG	tRNA uridine-5-carboxymethylaminomethyl(34) synthesis enzyme MnmG [Bacillus tequilensis]	0	RMVO01P001723
MUG01167.1	239	16S rRNA (guanine(527)-N(7))-methyltransferase RsmG	16S rRNA (guanine(527)-N(7))-methyltransferase RsmG [Bacillus tequilensis]	0	RMVO01P001724
MUG01168.1	283	nucleoid occlusion protein	nucleoid occlusion protein [Bacillus tequilensis]	0	RMVO01P001725
MUG01169.1	146	hypothetical protein	hypothetical protein ECC01_08905 [Bacillus tequilensis]	0	RMVO01P001726
MUG01170.1	253	sporulation initiation inhibitor protein Soj	sporulation initiation inhibitor protein Soj [Bacillus tequilensis]	0	RMVO01P001727
MUG01171.1	282	stage 0 sporulation protein Spo0J	stage 0 sporulation protein Spo0J [Bacillus tequilensis]	0	RMVO01P001728
MUG01172.1	205	spore protease YyaC	spore protease YyaC [Bacillus tequilensis]	0	RMVO01P001729
MUG01173.1	338	hypothetical protein	hypothetical protein ECC01_08925 [Bacillus tequilensis]	0	RMVO01P001730
MUG01174.1	68	DUF951 domain-containing protein	DUF951 domain-containing protein [Bacillus tequilensis]	0	RMVO01P001731
MUG01175.1	667	oxidoreductase	oxidoreductase [Bacillus tequilensis]	0	RMVO01P001732
MUG01176.1	366	redox-regulated ATPase YchF	redox-regulated ATPase YchF [Bacillus tequilensis]	0	RMVO01P001733
MUG01177.1	95	30S ribosomal protein S6	30S ribosomal protein S6 [Bacillus tequilensis]	0	RMVO01P001734
MUG01178.1	172	single-stranded DNA-binding protein	single-stranded DNA-binding protein [Bacillus tequilensis]	0	RMVO01P001735
MUG01179.1	79	30S ribosomal protein S18	30S ribosomal protein S18 [Bacillus tequilensis]	0	RMVO01P001736
MUG01180.1	252	exodeoxyribonuclease III	exodeoxyribonuclease III [Bacillus tequilensis]	0	RMVO01P001737
MUG01181.1	311	LacI family DNA-binding transcriptional regulator	LacI family DNA-binding transcriptional regulator [Bacillus tequilensis]	0	RMVO01P001738
MUG01182.1	126	glyoxalase/bleomycin resistance/extradiol dioxygenase family protein	glyoxalase/bleomycin resistance/extradiol dioxygenase family protein [Bacillus tequilensis]	0	RMVO01P001739
MUG01183.1	184	sugar O-acetyltransferase	sugar O-acetyltransferase [Bacillus tequilensis]	0	RMVO01P001740
MUG01184.1	451	MFS transporter	MFS transporter [Bacillus tequilensis]	0	RMVO01P001741
MUG01185.1	299	CPBP family intramembrane metalloprotease	CPBP family intramembrane metalloprotease [Bacillus tequilensis]	0	RMVO01P001742
MUG01186.1	689	thioredoxin domain-containing protein	thioredoxin domain-containing protein [Bacillus tequilensis]	0	RMVO01P001743
MUG01187.1	305	EamA/RhaT family transporter	EamA/RhaT family transporter [Bacillus tequilensis]	0	RMVO01P001744
MUG01189.1	66	hypothetical protein	hypothetical protein ECC01_09010 [Bacillus tequilensis]	0	RMVO01P001745
MUG01190.1	61	DUF255 domain-containing protein	DUF255 domain-containing protein [Bacillus tequilensis]	0	RMVO01P001746
MUG01191.1	188	dihydrofolate reductase	dihydrofolate reductase [Bacillus tequilensis]	0	RMVO01P001747
MUG01192.1	118	MmcQ/YjbR family DNA-binding protein	MmcQ/YjbR family DNA-binding protein [Bacillus tequilensis]	0	RMVO01P001748
MUG01193.1	173	streptothricin N-acetyltransferase SatA	streptothricin N-acetyltransferase SatA [Bacillus tequilensis]	0	RMVO01P001749
MUG01194.1	200	YitT family protein	YitT family protein [Bacillus tequilensis]	0	RMVO01P001750
MUG01195.1	148	GNAT family N-acetyltransferase	GNAT family N-acetyltransferase [Bacillus tequilensis]	0	RMVO01P001751
MUG01196.1	150	MarR family transcriptional regulator	MarR family transcriptional regulator [Bacillus tequilensis]	0	RMVO01P001752
MUG01197.1	220	MBL fold metallo-hydrolase	MBL fold metallo-hydrolase [Bacillus tequilensis]	0	RMVO01P001753
MUG01198.1	129	DUF4440 domain-containing protein	DUF4440 domain-containing protein [Bacillus tequilensis]	0	RMVO01P001754
MUG01199.1	262	hypothetical protein	hypothetical protein ECC01_09065 [Bacillus tequilensis]	0	RMVO01P001755
MUG01200.1	245	MerR family transcriptional regulator	MerR family transcriptional regulator [Bacillus tequilensis]	0	RMVO01P001756
MUG01201.1	436	MFS transporter	MFS transporter [Bacillus tequilensis]	0	RMVO01P001757
MUG01202.1	148	hypothetical protein	hypothetical protein ECC01_09080 [Bacillus tequilensis]	0	RMVO01P001758
MUG01203.1	309	manganese-dependent inorganic pyrophosphatase	manganese-dependent inorganic pyrophosphatase [Bacillus tequilensis]	0	RMVO01P001759
MUG01204.1	125	winged helix-turn-helix transcriptional regulator	winged helix-turn-helix transcriptional regulator [Bacillus tequilensis]	0	RMVO01P001760
MUG01205.1	160	spore coat protein CotF	spore coat protein CotF [Bacillus tequilensis]	0	RMVO01P001761
MUG01206.1	49	hypothetical protein	hypothetical protein ECC01_09100 [Bacillus tequilensis]	0	RMVO01P001762
MUG01207.1	309	DUF2232 domain-containing protein	DUF2232 domain-containing protein [Bacillus tequilensis]	0	RMVO01P001763
MUG01208.1	659	DHH family phosphoesterase	DHH family phosphoesterase [Bacillus tequilensis]	0	RMVO01P001764
MUG01209.1	149	50S ribosomal protein L9	50S ribosomal protein L9 [Bacillus tequilensis]	0	RMVO01P001765
MUG01210.1	683	glycosyltransferase family 39 protein	glycosyltransferase family 39 protein [Bacillus tequilensis]	0	RMVO01P001766
MUG01211.1	402	CynX/NimT family MFS transporter	CynX/NimT family MFS transporter [Bacillus tequilensis]	0	RMVO01P001767
MUG01212.1	46	YycC family protein	YycC family protein [Bacillus tequilensis]	0	RMVO01P001768
MUG01213.1	67	hypothetical protein	hypothetical protein ECC01_09135 [Bacillus tequilensis]	0	RMVO01P001769
MUG01214.1	66	DUF2188 domain-containing protein	DUF2188 domain-containing protein [Bacillus tequilensis]	0	RMVO01P001770
MUG01215.1	454	replicative DNA helicase	replicative DNA helicase [Bacillus tequilensis]	0	RMVO01P001771
MUG01216.1	139	VOC family protein	VOC family protein [Bacillus tequilensis]	0	RMVO01P001772
MUG01217.1	430	adenylosuccinate synthase	adenylosuccinate synthase [Bacillus tequilensis]	0	RMVO01P001773
MUG01219.1	611	cell wall metabolism sensor histidine kinase WalK	cell wall metabolism sensor histidine kinase WalK [Bacillus tequilensis]	0	RMVO01P001774
MUG01220.1	455	hypothetical protein	hypothetical protein ECC01_09190 [Bacillus tequilensis]	0	RMVO01P001775
MUG01221.1	280	two-component system YycFG regulatory protein	two-component system YycFG regulatory protein [Bacillus tequilensis]	0	RMVO01P001776
MUG01222.1	264	MBL fold metallo-hydrolase	MBL fold metallo-hydrolase [Bacillus tequilensis]	0	RMVO01P001777
MUG01223.1	400	serine protease	serine protease [Bacillus tequilensis]	0	RMVO01P001778
MUG01224.1	42	hypothetical protein	hypothetical protein ECC01_09210 [Bacillus tequilensis]	0	RMVO01P001779
MUG01225.1	461	arginine utilization regulatory protein RocR	arginine utilization regulatory protein RocR [Bacillus tequilensis]	0	RMVO01P001780
MUG01226.1	401	ornithine aminotransferase	ornithine aminotransferase [Bacillus tequilensis]	0	RMVO01P001781
MUG01227.1	467	amino acid permease	amino acid permease [Bacillus tequilensis]	0	RMVO01P001782
MUG01228.1	296	arginase	arginase [Bacillus tequilensis]	0	RMVO01P001783
MUG01229.1	38	Phr family secreted Rap phosphatase inhibitor	Phr family secreted Rap phosphatase inhibitor [Bacillus tequilensis]	0	RMVO01P001784
MUG01230.1	365	tetratricopeptide repeat protein	tetratricopeptide repeat protein [Bacillus tequilensis]	0	RMVO01P001785
MUG01231.1	156	GNAT family N-acetyltransferase	GNAT family N-acetyltransferase [Bacillus tequilensis]	0	RMVO01P001786
MUG01232.1	245	hypothetical protein	hypothetical protein ECC01_09255 [Bacillus tequilensis]	0	RMVO01P001787
MUG01233.1	387	hypothetical protein	hypothetical protein ECC01_09260 [Bacillus tequilensis]	0	RMVO01P001788
MUG01234.1	82	DUF2651 domain-containing protein	DUF2651 domain-containing protein [Bacillus tequilensis]	0	RMVO01P001789
MUG01235.1	56	hypothetical protein	hypothetical protein ECC01_09270 [Bacillus tequilensis]	0	RMVO01P001790
MUG01236.1	408	formaldehyde dehydrogenase, glutathione-independent	formaldehyde dehydrogenase, glutathione-independent [Bacillus tequilensis]	0	RMVO01P001791
MUG01237.1	137	hypothetical protein	hypothetical protein ECC01_09280 [Bacillus tequilensis]	0	RMVO01P001792
MUG01238.1	56	CxxH/CxxC protein	CxxH/CxxC protein [Bacillus tequilensis]	0	RMVO01P001793
MUG01239.1	159	23S rRNA (pseudouridine(1915)-N(3))-methyltransferase RlmH	23S rRNA (pseudouridine(1915)-N(3))-methyltransferase RlmH [Bacillus tequilensis]	0	RMVO01P001794
MUG01240.1	1188	SIR2 family protein	SIR2 family protein [Bacillus tequilensis]	0	RMVO01P001795
MUG01241.1	674	hypothetical protein	hypothetical protein ECC01_09300 [Bacillus tequilensis]	0	RMVO01P001796
MUG01242.1	641	fructose-bisphosphatase class III	fructose-bisphosphatase class III [Bacillus tequilensis]	0	RMVO01P001797
MUG01243.1	49	YydF family exported signaling peptide	YydF family exported signaling peptide [Bacillus tequilensis]	0	RMVO01P001798
MUG01244.1	319	YydG family peptide radical SAM peptide maturase	YydG family peptide radical SAM peptide maturase [Bacillus tequilensis]	0	RMVO01P001799
MUG01245.1	252	peptidase	peptidase [Bacillus tequilensis]	0	RMVO01P001800
MUG01246.1	209	ATP-binding cassette domain-containing protein	ATP-binding cassette domain-containing protein [Bacillus tequilensis]	0	RMVO01P001801
MUG01247.1	240	peptide ABC transporter permease	peptide ABC transporter permease [Bacillus tequilensis]	0	RMVO01P001802
MUG01248.1	53	hypothetical protein	hypothetical protein ECC01_09335 [Bacillus tequilensis]	0	RMVO01P001803
MUG01249.1	236	GntR family transcriptional regulator	GntR family transcriptional regulator [Bacillus tequilensis]	0	RMVO01P001804
MUG01250.1	479	6-phospho-beta-glucosidase	6-phospho-beta-glucosidase [Bacillus tequilensis]	0	RMVO01P001805
MUG01251.1	450	polysaccharide pyruvyl transferase family protein	polysaccharide pyruvyl transferase family protein [Bacillus tequilensis]	0	RMVO01P001806
MUG01252.1	509	alkyl hydroperoxide reductase subunit F	alkyl hydroperoxide reductase subunit F [Bacillus tequilensis]	0	RMVO01P001807
MUG01253.1	187	peroxiredoxin	peroxiredoxin [Bacillus tequilensis]	0	RMVO01P001808
MUG01254.1	468	decarboxylating NADP(+)-dependent phosphogluconate dehydrogenase	decarboxylating NADP(+)-dependent phosphogluconate dehydrogenase [Bacillus tequilensis]	0	RMVO01P001809
MUG01255.1	448	gluconate permease GntP	gluconate permease GntP [Bacillus tequilensis]	0	RMVO01P001810
MUG01256.1	513	gluconokinase	gluconokinase [Bacillus tequilensis]	0	RMVO01P001811
MUG01257.1	243	gluconate operon transcriptional repressor GntR	gluconate operon transcriptional repressor GntR [Bacillus tequilensis]	0	RMVO01P001812
MUG01258.1	382	glycerate kinase	glycerate kinase [Bacillus tequilensis]	0	RMVO01P001813
MUG01259.1	343	general stress protein	general stress protein [Bacillus tequilensis]	0	RMVO01P001814
MUG01260.1	230	LrgB family protein	LrgB family protein [Bacillus tequilensis]	0	RMVO01P001815
MUG01261.1	134	CidA/LrgA family holin-like protein	CidA/LrgA family holin-like protein [Bacillus tequilensis]	0	RMVO01P001816
MUG01262.1	143	MarR family transcriptional regulator	MarR family transcriptional regulator [Bacillus tequilensis]	0	RMVO01P001817
MUG01263.1	356	SDR family oxidoreductase	SDR family oxidoreductase [Bacillus tequilensis]	0	RMVO01P001818
MUG01264.1	191	TetR/AcrR family transcriptional regulator	TetR/AcrR family transcriptional regulator [Bacillus tequilensis]	0	RMVO01P001819
MUG01265.1	337	cupin domain-containing protein	cupin domain-containing protein [Bacillus tequilensis]	0	RMVO01P001820
MUG01266.1	402	DUF418 domain-containing protein	DUF418 domain-containing protein [Bacillus tequilensis]	0	RMVO01P001821
MUG01267.1	151	RDD family protein	RDD family protein [Bacillus tequilensis]	0	RMVO01P001822
MUG01268.1	141	hypothetical protein	hypothetical protein ECC01_09445 [Bacillus tequilensis]	0	RMVO01P001823
MUG01270.1	155	RDD family protein	RDD family protein [Bacillus tequilensis]	0	RMVO01P001824
MUG01271.1	445	aldehyde dehydrogenase family protein	aldehyde dehydrogenase family protein [Bacillus tequilensis]	0	RMVO01P001825
MUG01272.1	380	TetR family transcriptional regulator	TetR family transcriptional regulator [Bacillus tequilensis]	0	RMVO01P001826
MUG01273.1	62	hypothetical protein	hypothetical protein ECC01_09470 [Bacillus tequilensis]	0	RMVO01P001827
MUG01274.1	489	HlyD family efflux transporter periplasmic adaptor subunit	HlyD family efflux transporter periplasmic adaptor subunit [Bacillus tequilensis]	0	RMVO01P001828
MUG01275.1	727	peptide cleavage/export ABC transporter	peptide cleavage/export ABC transporter [Bacillus tequilensis]	0	RMVO01P001829
MUG01276.1	81	bacteriocin, lactobin A family protein	bacteriocin, lactobin A family protein [Bacillus tequilensis]	0	RMVO01P001830
MUG01277.1	65	bacteriocin, lactococcin A1 family protein	bacteriocin, lactococcin A1 family protein [Bacillus tequilensis]	0	RMVO01P001831
MUG01278.1	269	SDR family oxidoreductase	SDR family oxidoreductase [Bacillus tequilensis]	0	RMVO01P001832
MUG01279.1	83	hypothetical protein	hypothetical protein ECC01_09500 [Bacillus tequilensis]	0	RMVO01P001833
MUG01280.1	626	molecular chaperone HtpG	molecular chaperone HtpG [Bacillus tequilensis]	0	RMVO01P001834
MUG01281.1	461	sugar porter family MFS transporter	sugar porter family MFS transporter [Bacillus tequilensis]	0	RMVO01P001835
MUG01282.1	102	DUF2653 family protein	DUF2653 family protein [Bacillus tequilensis]	0	RMVO01P001836
MUG01283.1	216	hypothetical protein	hypothetical protein ECC01_09520 [Bacillus tequilensis]	0	RMVO01P001837
MUG01284.1	310	aldo/keto reductase	aldo/keto reductase [Bacillus tequilensis]	0	RMVO01P001838
MUG01285.1	251	DeoR/GlpR transcriptional regulator	DeoR/GlpR transcriptional regulator [Bacillus tequilensis]	0	RMVO01P001839
MUG01286.1	487	CoA-acylating methylmalonate-semialdehyde dehydrogenase	CoA-acylating methylmalonate-semialdehyde dehydrogenase [Bacillus tequilensis]	0	RMVO01P001840
MUG01287.1	271	5-deoxy-glucuronate isomerase	5-deoxy-glucuronate isomerase [Bacillus tequilensis]	0	RMVO01P001841
MUG01288.1	325	5-dehydro-2-deoxygluconokinase	5-dehydro-2-deoxygluconokinase [Bacillus tequilensis]	0	RMVO01P001842
MUG01289.1	637	3D-(3,5/4)-trihydroxycyclohexane-1,2-dione acylhydrolase (decyclizing)	3D-(3,5/4)-trihydroxycyclohexane-1,2-dione acylhydrolase (decyclizing) [Bacillus tequilensis]	0	RMVO01P001843
MUG01290.1	297	myo-inosose-2 dehydratase	myo-inosose-2 dehydratase [Bacillus tequilensis]	0	RMVO01P001844
MUG01291.1	438	MFS transporter	MFS transporter [Bacillus tequilensis]	0	RMVO01P001845
MUG01292.1	344	Gfo/Idh/MocA family oxidoreductase	Gfo/Idh/MocA family oxidoreductase [Bacillus tequilensis]	0	RMVO01P001846
MUG01293.1	289	sugar phosphate isomerase/epimerase	sugar phosphate isomerase/epimerase [Bacillus tequilensis]	0	RMVO01P001847
MUG01294.1	278	2-keto-myo-inositol isomerase	2-keto-myo-inositol isomerase [Bacillus tequilensis]	0	RMVO01P001848
MUG01295.1	290	class II fructose-1,6-bisphosphate aldolase	class II fructose-1,6-bisphosphate aldolase [Bacillus tequilensis]	0	RMVO01P001849
MUG01296.1	229	response regulator transcription factor	response regulator transcription factor [Bacillus tequilensis]	0	RMVO01P001850
MUG01297.1	325	HAMP domain-containing histidine kinase	HAMP domain-containing histidine kinase [Bacillus tequilensis]	0	RMVO01P001851
MUG01298.1	257	ABC transporter ATP-binding protein	ABC transporter ATP-binding protein [Bacillus tequilensis]	0	RMVO01P001852
MUG01299.1	622	ABC transporter permease	ABC transporter permease [Bacillus tequilensis]	0	RMVO01P001853
MUG01300.1	115	YxeA family protein	YxeA family protein [Bacillus tequilensis]	0	RMVO01P001854
MUG01301.1	321	iron-hydroxamate ABC transporter substrate-binding protein	iron-hydroxamate ABC transporter substrate-binding protein [Bacillus tequilensis]	0	RMVO01P001855
MUG01302.1	132	hypothetical protein	hypothetical protein ECC01_09615 [Bacillus tequilensis]	0	RMVO01P001856
MUG01303.1	117	hypothetical protein	hypothetical protein ECC01_09620 [Bacillus tequilensis]	0	RMVO01P001857
MUG01304.1	121	hypothetical protein	hypothetical protein ECC01_09625 [Bacillus tequilensis]	0	RMVO01P001858
MUG01305.1	144	DUF3255 domain-containing protein	DUF3255 domain-containing protein [Bacillus tequilensis]	0	RMVO01P001859
MUG01306.1	185	hypothetical protein	hypothetical protein ECC01_09635 [Bacillus tequilensis]	0	RMVO01P001860
MUG01307.1	270	sugar-phosphatase	sugar-phosphatase [Bacillus tequilensis]	0	RMVO01P001861
MUG01308.1	328	choloylglycine hydrolase family protein	choloylglycine hydrolase family protein [Bacillus tequilensis]	0	RMVO01P001862
MUG01309.1	441	LLM class flavin-dependent oxidoreductase	LLM class flavin-dependent oxidoreductase [Bacillus tequilensis]	0	RMVO01P001863
MUG01310.1	165	GNAT family N-acetyltransferase	GNAT family N-acetyltransferase [Bacillus tequilensis]	0	RMVO01P001864
MUG01311.1	264	amino acid ABC transporter substrate-binding protein	amino acid ABC transporter substrate-binding protein [Bacillus tequilensis]	0	RMVO01P001865
MUG01312.1	224	amino acid ABC transporter permease	amino acid ABC transporter permease [Bacillus tequilensis]	0	RMVO01P001866
MUG01313.1	249	amino acid ABC transporter ATP-binding protein	amino acid ABC transporter ATP-binding protein [Bacillus tequilensis]	0	RMVO01P001867
MUG01314.1	380	amidohydrolase	amidohydrolase [Bacillus tequilensis]	0	RMVO01P001868
MUG01315.1	445	MmgE/PrpD family protein	MmgE/PrpD family protein [Bacillus tequilensis]	0	RMVO01P001869
MUG01316.1	370	ethanolamine utilization protein EutH	ethanolamine utilization protein EutH [Bacillus tequilensis]	0	RMVO01P001870
MUG01317.1	275	DUF1206 domain-containing protein	DUF1206 domain-containing protein [Bacillus tequilensis]	0	RMVO01P001871
MUG01318.1	313	sugar-binding transcriptional regulator	sugar-binding transcriptional regulator [Bacillus tequilensis]	0	RMVO01P001872
MUG01319.1	223	deoxyribose-phosphate aldolase	deoxyribose-phosphate aldolase [Bacillus tequilensis]	0	RMVO01P001873
MUG01320.1	393	NupC/NupG family nucleoside CNT transporter	NupC/NupG family nucleoside CNT transporter [Bacillus tequilensis]	0	RMVO01P001874
MUG01321.1	433	pyrimidine-nucleoside phosphorylase	pyrimidine-nucleoside phosphorylase [Bacillus tequilensis]	0	RMVO01P001875
MUG01322.1	475	amino acid permease	amino acid permease [Bacillus tequilensis]	0	RMVO01P001876
MUG01323.1	319	formimidoylglutamase	formimidoylglutamase [Bacillus tequilensis]	0	RMVO01P001877
MUG01324.1	421	imidazolonepropionase	imidazolonepropionase [Bacillus tequilensis]	0	RMVO01P001878
MUG01325.1	552	urocanate hydratase	urocanate hydratase [Bacillus tequilensis]	0	RMVO01P001879
MUG01326.1	508	histidine ammonia-lyase	histidine ammonia-lyase [Bacillus tequilensis]	0	RMVO01P001880
MUG01327.1	148	hut operon transcriptional regulator HutP	hut operon transcriptional regulator HutP [Bacillus tequilensis]	0	RMVO01P001881
MUG01328.1	469	glycoside hydrolase family 43 protein	glycoside hydrolase family 43 protein [Bacillus tequilensis]	0	RMVO01P001882
MUG01329.1	121	DUF5082 domain-containing protein	DUF5082 domain-containing protein [Bacillus tequilensis]	0	RMVO01P001883
MUG01330.1	89	hypothetical protein	hypothetical protein ECC01_09760 [Bacillus tequilensis]	0	RMVO01P001884
MUG01332.1	92	DUF4176 domain-containing protein	DUF4176 domain-containing protein [Bacillus tequilensis]	0	RMVO01P001885
MUG01333.1	68	hypothetical protein	hypothetical protein ECC01_09780 [Bacillus tequilensis]	0	RMVO01P001886
MUG01334.1	112	hypothetical protein	hypothetical protein ECC01_09790 [Bacillus tequilensis]	0	RMVO01P001887
MUG01335.1	609	PTS beta-glucoside transporter subunit EIIBCA	PTS beta-glucoside transporter subunit EIIBCA [Bacillus tequilensis]	0	RMVO01P001888
MUG01336.1	469	glycoside hydrolase family 1 protein	glycoside hydrolase family 1 protein [Bacillus tequilensis]	0	RMVO01P001889
MUG01337.1	148	universal stress protein	universal stress protein [Bacillus tequilensis]	0	RMVO01P001890
MUG01339.1	2343	RHS repeat protein	RHS repeat protein [Bacillus tequilensis]	0	RMVO01P001891
MUG01340.1	159	hypothetical protein	hypothetical protein ECC01_09820 [Bacillus tequilensis]	0	RMVO01P001892
MUG01341.1	128	hypothetical protein	hypothetical protein ECC01_09825 [Bacillus tequilensis]	0	RMVO01P001893
MUG01343.1	162	DUF2716 domain-containing protein	DUF2716 domain-containing protein [Bacillus tequilensis]	0	RMVO01P001894
MUG01344.1	98	hypothetical protein	hypothetical protein ECC01_09845 [Bacillus tequilensis]	0	RMVO01P001895
MUG01345.1	150	hypothetical protein	hypothetical protein ECC01_09850 [Bacillus tequilensis]	0	RMVO01P001896
MUG01346.1	116	hypothetical protein	hypothetical protein ECC01_09855 [Bacillus tequilensis]	0	RMVO01P001897
MUG01347.1	382	esterase	esterase [Bacillus tequilensis]	0	RMVO01P001898
MUG01348.1	479	ATP-dependent RNA helicase DbpA	ATP-dependent RNA helicase DbpA [Bacillus tequilensis]	0	RMVO01P001899
MUG01349.1	478	ATP-binding protein	ATP-binding protein [Bacillus tequilensis]	0	RMVO01P001900
MUG01351.1	316	PD-(D/E)XK motif protein	PD-(D/E)XK motif protein [Bacillus tequilensis]	0	RMVO01P001901
MUG01352.1	680	AIPR family protein	AIPR family protein [Bacillus tequilensis]	0	RMVO01P001902
MUG01353.1	547	DNA cytosine methyltransferase	DNA cytosine methyltransferase [Bacillus tequilensis]	0	RMVO01P001903
MUG01354.1	417	MFS transporter	MFS transporter [Bacillus tequilensis]	0	RMVO01P001904
MUG01355.1	226	hypothetical protein	hypothetical protein ECC01_09900 [Bacillus tequilensis]	0	RMVO01P001905
MUG01356.1	277	PRD domain-containing protein	PRD domain-containing protein [Bacillus tequilensis]	0	RMVO01P001906
MUG01357.1	686	catalase	catalase [Bacillus tequilensis]	0	RMVO01P001907
MUG01358.1	96	hypothetical protein	hypothetical protein ECC01_09925 [Bacillus tequilensis]	0	RMVO01P001908
MUG01359.1	223	DUF3298 and DUF4163 domain-containing protein	DUF3298 and DUF4163 domain-containing protein [Bacillus tequilensis]	0	RMVO01P001909
MUG01360.1	397	NupC/NupG family nucleoside CNT transporter	NupC/NupG family nucleoside CNT transporter [Bacillus tequilensis]	0	RMVO01P001910
MUG01361.1	282	methyltransferase domain-containing protein	methyltransferase domain-containing protein [Bacillus tequilensis]	0	RMVO01P001911
MUG01362.1	472	GntP family permease	GntP family permease [Bacillus tequilensis]	0	RMVO01P001912
MUG01363.1	238	succinyl-CoA--3-ketoacid CoA transferase subunit A	succinyl-CoA--3-ketoacid CoA transferase subunit A [Bacillus tequilensis]	0	RMVO01P001913
MUG01364.1	216	CoA transferase subunit B	CoA transferase subunit B [Bacillus tequilensis]	0	RMVO01P001914
MUG01365.1	257	3-hydroxybutyrate dehydrogenase	3-hydroxybutyrate dehydrogenase [Bacillus tequilensis]	0	RMVO01P001915
MUG01366.1	378	5-methyltetrahydropteroyltriglutamate--homocysteine S-methyltransferase	5-methyltetrahydropteroyltriglutamate--homocysteine S-methyltransferase [Bacillus tequilensis]	0	RMVO01P001916
MUG01367.1	377	5-methyltetrahydropteroyltriglutamate--homocysteine S-methyltransferase	5-methyltetrahydropteroyltriglutamate--homocysteine S-methyltransferase [Bacillus tequilensis]	0	RMVO01P001917
MUG01368.1	162	hypothetical protein	hypothetical protein ECC01_09975 [Bacillus tequilensis]	0	RMVO01P001918
MUG01369.1	84	hypothetical protein	hypothetical protein ECC01_09980 [Bacillus tequilensis]	0	RMVO01P001919
MUG01370.1	410	peptidase T	peptidase T [Bacillus tequilensis]	0	RMVO01P001920
MUG01371.1	218	response regulator transcription factor	response regulator transcription factor [Bacillus tequilensis]	0	RMVO01P001921
MUG01372.1	407	sensor histidine kinase	sensor histidine kinase [Bacillus tequilensis]	0	RMVO01P001922
MUG01373.1	157	DUF1453 family protein	DUF1453 family protein [Bacillus tequilensis]	0	RMVO01P001923
MUG01374.1	291	LysR family transcriptional regulator	LysR family transcriptional regulator [Bacillus tequilensis]	0	RMVO01P001924
MUG01375.1	168	YbhB/YbcL family Raf kinase inhibitor-like protein	YbhB/YbcL family Raf kinase inhibitor-like protein [Bacillus tequilensis]	0	RMVO01P001925
MUG01376.1	339	UDP-glucose 4-epimerase	UDP-glucose 4-epimerase [Bacillus tequilensis]	0	RMVO01P001926
MUG01378.1	278	YitT family protein	YitT family protein [Bacillus tequilensis]	0	RMVO01P001927
MUG01379.1	485	aldehyde dehydrogenase family protein	aldehyde dehydrogenase family protein [Bacillus tequilensis]	0	RMVO01P001928
MUG01380.1	297	PucR family transcriptional regulator	PucR family transcriptional regulator [Bacillus tequilensis]	0	RMVO01P001929
MUG01381.1	365	sn-glycerol-3-phosphate ABC transporter ATP-binding protein UgpC	sn-glycerol-3-phosphate ABC transporter ATP-binding protein UgpC [Bacillus tequilensis]	0	RMVO01P001930
MUG01382.1	121	hypothetical protein	hypothetical protein ECC01_10050 [Bacillus tequilensis]	0	RMVO01P001931
MUG01383.1	279	polysaccharide deacetylase family protein	polysaccharide deacetylase family protein [Bacillus tequilensis]	0	RMVO01P001932
MUG01384.1	66	hypothetical protein	hypothetical protein ECC01_10060 [Bacillus tequilensis]	0	RMVO01P001933
MUG01385.1	562	peptidase	peptidase [Bacillus tequilensis]	0	RMVO01P001934
MUG01386.1	450	malate permease	malate permease [Bacillus tequilensis]	0	RMVO01P001935
MUG01387.1	468	cytochrome ubiquinol oxidase subunit I	cytochrome ubiquinol oxidase subunit I [Bacillus tequilensis]	0	RMVO01P001936
MUG01388.1	338	cytochrome d ubiquinol oxidase subunit II	cytochrome d ubiquinol oxidase subunit II [Bacillus tequilensis]	0	RMVO01P001937
MUG01389.1	564	thiol reductant ABC exporter subunit CydD	thiol reductant ABC exporter subunit CydD [Bacillus tequilensis]	0	RMVO01P001938
MUG01390.1	575	thiol reductant ABC exporter subunit CydC	thiol reductant ABC exporter subunit CydC [Bacillus tequilensis]	0	RMVO01P001939
MUG01391.1	276	NAD(P)H-hydrate dehydratase	NAD(P)H-hydrate dehydratase [Bacillus tequilensis]	0	RMVO01P001940
MUG01392.1	457	cytosine permease	cytosine permease [Bacillus tequilensis]	0	RMVO01P001941
MUG01393.1	178	RNA polymerase sigma factor SigY	RNA polymerase sigma factor SigY [Bacillus tequilensis]	0	RMVO01P001942
MUG01394.1	106	hypothetical protein	hypothetical protein ECC01_10110 [Bacillus tequilensis]	0	RMVO01P001943
MUG01395.1	68	transcriptional regulator	transcriptional regulator [Bacillus tequilensis]	0	RMVO01P001944
MUG01396.1	62	negative regulatory protein YxlE	negative regulatory protein YxlE [Bacillus tequilensis]	0	RMVO01P001945
MUG01397.1	295	ABC transporter ATP-binding protein	ABC transporter ATP-binding protein [Bacillus tequilensis]	0	RMVO01P001946
MUG01398.1	258	ABC transporter permease	ABC transporter permease [Bacillus tequilensis]	0	RMVO01P001947
MUG01399.1	400	MFS transporter	MFS transporter [Bacillus tequilensis]	0	RMVO01P001948
MUG01400.1	547	catalase	catalase [Bacillus tequilensis]	0	RMVO01P001949
MUG01401.1	196	DNA-3-methyladenine glycosylase	DNA-3-methyladenine glycosylase [Bacillus tequilensis]	0	RMVO01P001950
MUG01403.1	641	transcription antiterminator	transcription antiterminator [Bacillus tequilensis]	0	RMVO01P001951
MUG01404.1	102	PTS sugar transporter subunit IIB	PTS sugar transporter subunit IIB [Bacillus tequilensis]	0	RMVO01P001952
MUG01405.1	452	PTS cellobiose transporter subunit IIC	PTS cellobiose transporter subunit IIC [Bacillus tequilensis]	0	RMVO01P001953
MUG01406.1	110	PTS lactose/cellobiose transporter subunit IIA	PTS lactose/cellobiose transporter subunit IIA [Bacillus tequilensis]	0	RMVO01P001954
MUG01407.1	442	6-phospho-beta-glucosidase	6-phospho-beta-glucosidase [Bacillus tequilensis]	0	RMVO01P001955
MUG01408.1	363	branched-chain amino acid aminotransferase	branched-chain amino acid aminotransferase [Bacillus tequilensis]	0	RMVO01P001956
MUG01409.1	252	SDR family NAD(P)-dependent oxidoreductase	SDR family NAD(P)-dependent oxidoreductase [Bacillus tequilensis]	0	RMVO01P001957
MUG01410.1	392	D-alanyl-lipoteichoic acid biosynthesis protein DltD	D-alanyl-lipoteichoic acid biosynthesis protein DltD [Bacillus tequilensis]	0	RMVO01P001958
MUG01411.1	78	D-alanine--poly(phosphoribitol) ligase subunit DltC	D-alanine--poly(phosphoribitol) ligase subunit DltC [Bacillus tequilensis]	0	RMVO01P001959
MUG01412.1	395	D-alanyl-lipoteichoic acid biosynthesis protein DltB	D-alanyl-lipoteichoic acid biosynthesis protein DltB [Bacillus tequilensis]	0	RMVO01P001960
MUG01413.1	503	D-alanine--poly(phosphoribitol) ligase subunit DltA	D-alanine--poly(phosphoribitol) ligase subunit DltA [Bacillus tequilensis]	0	RMVO01P001961
MUG01414.1	49	teichoic acid D-Ala incorporation-associated protein DltX	teichoic acid D-Ala incorporation-associated protein DltX [Bacillus tequilensis]	0	RMVO01P001962
MUG01415.1	44	hypothetical protein	hypothetical protein ECC01_10215 [Bacillus tequilensis]	0	RMVO01P001963
MUG01416.1	311	1,4-dihydroxy-2-naphthoate octaprenyltransferase	1,4-dihydroxy-2-naphthoate octaprenyltransferase [Bacillus tequilensis]	0	RMVO01P001964
MUG01417.1	210	GTP pyrophosphokinase YwaC	GTP pyrophosphokinase YwaC [Bacillus tequilensis]	0	RMVO01P001965
MUG01418.1	397	MFS transporter	MFS transporter [Bacillus tequilensis]	0	RMVO01P001966
MUG01419.1	127	carboxymuconolactone decarboxylase family protein	carboxymuconolactone decarboxylase family protein [Bacillus tequilensis]	0	RMVO01P001967
MUG01420.1	279	helix-turn-helix domain-containing protein	helix-turn-helix domain-containing protein [Bacillus tequilensis]	0	RMVO01P001968
MUG01421.1	455	aminopeptidase YwaD	aminopeptidase YwaD [Bacillus tequilensis]	0	RMVO01P001969
MUG01422.1	413	tyrosine--tRNA ligase	tyrosine--tRNA ligase [Bacillus tequilensis]	0	RMVO01P001970
MUG01423.1	171	MarR family transcriptional regulator	MarR family transcriptional regulator [Bacillus tequilensis]	0	RMVO01P001971
MUG01424.1	237	TIGR02206 family membrane protein	TIGR02206 family membrane protein [Bacillus tequilensis]	0	RMVO01P001972
MUG01425.1	286	glycosyltransferase family 8 protein	glycosyltransferase family 8 protein [Bacillus tequilensis]	0	RMVO01P001973
MUG01426.1	280	transcription antiterminator	transcription antiterminator [Bacillus tequilensis]	0	RMVO01P001974
MUG01427.1	459	negative regulator of SacY activity	negative regulator of SacY activity [Bacillus tequilensis]	0	RMVO01P001975
MUG01428.1	645	peptidase S8	peptidase S8 [Bacillus tequilensis]	0	RMVO01P001976
MUG01429.1	444	PTS cellobiose transporter subunit IIC	PTS cellobiose transporter subunit IIC [Bacillus tequilensis]	0	RMVO01P001977
MUG01430.1	225	DUF2711 family protein	DUF2711 family protein [Bacillus tequilensis]	0	RMVO01P001978
MUG01431.1	126	VOC family protein	VOC family protein [Bacillus tequilensis]	0	RMVO01P001979
MUG01432.1	395	class I SAM-dependent rRNA methyltransferase	class I SAM-dependent rRNA methyltransferase [Bacillus tequilensis]	0	RMVO01P001980
MUG01433.1	65	YwbE family protein	YwbE family protein [Bacillus tequilensis]	0	RMVO01P001981
MUG01434.1	400	MFS transporter	MFS transporter [Bacillus tequilensis]	0	RMVO01P001982
MUG01435.1	225	CidB/LrgB family autolysis modulator	CidB/LrgB family autolysis modulator [Bacillus tequilensis]	0	RMVO01P001983
MUG01436.1	128	CidA/LrgA family holin-like protein	CidA/LrgA family holin-like protein [Bacillus tequilensis]	0	RMVO01P001984
MUG01437.1	301	LysR family transcriptional regulator	LysR family transcriptional regulator [Bacillus tequilensis]	0	RMVO01P001985
MUG01438.1	272	hydroxyethylthiazole kinase	hydroxyethylthiazole kinase [Bacillus tequilensis]	0	RMVO01P001986
MUG01439.1	222	thiamine phosphate synthase	thiamine phosphate synthase [Bacillus tequilensis]	0	RMVO01P001987
MUG01440.1	481	iron transporter	iron transporter [Bacillus tequilensis]	0	RMVO01P001988
MUG01441.1	385	Efem/EfeO family lipoprotein	Efem/EfeO family lipoprotein [Bacillus tequilensis]	0	RMVO01P001989
MUG01442.1	416	deferrochelatase/peroxidase EfeB	deferrochelatase/peroxidase EfeB [Bacillus tequilensis]	0	RMVO01P001990
MUG01443.1	206	DsbA family protein	DsbA family protein [Bacillus tequilensis]	0	RMVO01P001991
MUG01444.1	513	cation acetate symporter	cation acetate symporter [Bacillus tequilensis]	0	RMVO01P001992
MUG01445.1	102	DUF485 domain-containing protein	DUF485 domain-containing protein [Bacillus tequilensis]	0	RMVO01P001993
MUG01446.1	52	DNA-binding anti-repressor SinI	DNA-binding anti-repressor SinI [Bacillus tequilensis]	0	RMVO01P001994
MUG01447.1	223	helix-turn-helix transcriptional regulator	helix-turn-helix transcriptional regulator [Bacillus tequilensis]	0	RMVO01P001995
MUG01448.1	127	GtrA family protein	GtrA family protein [Bacillus tequilensis]	0	RMVO01P001996
MUG01449.1	390	galactokinase	galactokinase [Bacillus tequilensis]	0	RMVO01P001997
MUG01450.1	513	UDP-glucose--hexose-1-phosphate uridylyltransferase	UDP-glucose--hexose-1-phosphate uridylyltransferase [Bacillus tequilensis]	0	RMVO01P001998
MUG01453.1	649	cytochrome aa3 quinol oxidase subunit I	cytochrome aa3 quinol oxidase subunit I [Bacillus tequilensis]	0	RMVO01P001999
[truncated: 2,494 more rows]
