# Supplementary material for: Whole Genome Sequence of Biosurfactant Producing Bacillus Tequilensis
Source: Research Square preprint supplement (doi:10.21203/rs.3.rs-115961/v2), 2021-04-30
Supplement: Supplementary file 2 [file f7c703d50a6e5e97e91c2e6c.docx]

**Whole Genome Sequence of biosurfactant producing *Bacillus tequilensis***

**Title for the supplementary files**

Supplementary Table 1 :*Bacillus tequilensis* Genome annotation data

Supplementary table 2 : *Bacillus tequilensis* CDS data

Supplementary table 3 : *Bacillus tequilensis* subsystem classification

Supplementary table 4 : Variant calling of *Bacillus tequilensis* ANSKLAB04 by comparing *Bacillus tequilensis* KCTC 13622

Supplementary table 5 : Variant calling of *Bacillus tequilensis* ANSKLAB04 by comparing *Bacillus subtilis*

Supplementary table 6 : Variant calling *of Bacillus tequilensis* ANSKLAB04 by comparing *Bacillus vallismortis*

Supplementary table 7 : Variant calling of *Bacillus tequilensis* ANSKLAB04 by comparing *Bacillus halotolerans*

Supplementary table 8 : Variant calling of *Bacillus tequilensis* ANSKLAB04 by comparing *Bacillus mojavensis*
